# Supplementary material
Source: PubMed Central journal article supplement (PMC4029416)
Supplement: NIHMS583393-supplement-Online_Only_Supplement_parts_A-M.pdf [file NIHMS583393-supplement-Online_Only_Supplement_parts_A-M.pdf]

# Harmonizing the Classification of Age-related Macular Degeneration in the Three-Continent AMD Consortium

Online-Only Supplement

Table of Contents

| <b>Section</b> | <b>Title</b>                                                                                      | <b>Page</b> |
|----------------|---------------------------------------------------------------------------------------------------|-------------|
| A              | Descriptions of study populations, photography and grading                                        | 2           |
| B              | Beaver Dam Eye Study preliminary grading form                                                     | 6           |
| C              | Beaver Dam Eye Study detail grading form                                                          | 8           |
| D              | Beaver Dam Eye Study and Los Angeles Latino Eye Study 3-step AMD severity scale                   | 12          |
| E              | Beaver Dam Eye Study 6-step AMD severity scale                                                    | 13          |
| F              | Blue Mountains Eye Study AMD grading form                                                         | 14          |
| G              | Blue Mountains Eye Study 3-step AMD severity scale                                                | 16          |
| H              | Los Angeles Latino Eye Study preliminary grading form                                             | 17          |
| I              | Los Angeles Latino Eye Study detail grading form                                                  | 19          |
| J              | Age-Related Eye Disease Study 11-step AMD severity scale used in the Los Angeles Latino Eye Study | 20          |
| K              | Rotterdam Study AMD grading form                                                                  | 21          |
| L              | Rotterdam Study 4-step AMD severity scale                                                         | 24          |
| M              | Members of the Three Continent AMD Consortium and their affiliations                              | 25          |

AMD, age-related macular degeneration.

## A. Descriptions of Study Populations, Photography and Grading

### Beaver Dam Eye Study (BDES)

In 1987-1988, 5,924 persons aged 43 to 84 years and living in Beaver Dam, Wisconsin were identified by a private census.<sup>14</sup> From March 1988 to May 1990, 4,926 persons (83.1%) were examined at baseline and 4,778 (97.0%) had gradable retinal photographs for AMD.<sup>15</sup> There have been four follow-up examinations spaced five years apart, in which 3,722 persons (3,556 with gradable photographs) were examined in March 1993 to June 1995, 2,962 persons (2,831 with gradable photographs) were examined in March 1998 to June 2000, 2,375 persons (2,260 with gradable photographs) were examined in March 2003 to June 2005, and 1,913 persons (1,790 with gradable photographs) were examined between November 2008 and November 2010.<sup>16-19</sup>

Methods were unchanged across examinations except for additions to the examination protocol. Participants' pupils were pharmacologically dilated and color stereoscopic fundus photographs of Diabetic Retinopathy Study [DRS] Standard Field 1 centered on the disc, Field 2 centered on the fovea, and a non-stereoscopic photograph of Field 3 centered temporal to the fovea were taken of each eye using a Zeiss 30° FF4 film fundus camera (Carl Zeiss Inc., Oberkochen, Germany). Color photographic film was used at all examinations and it was processed at the same laboratory each time.

Prior to grading, a clear plastic grid consisting of three circles concentric with the macula and four radial lines was superimposed over one member of the stereoscopic pair of Field 2 to define nine subfields (Figure 1A). A second clear plastic grid consisting of different sized circles was used to estimate the size of lesions and area of involvement (Figure 1B).

The photographs of each eye were graded in a masked fashion for AMD and other retinal diseases.<sup>20-22</sup> A multiple-step grading system was used. First, a grader examined the photographs of each eye and assigned an overall score for each AMD lesion in the grid (Online Supplement part B). Next, the photographs were graded in detail by a different grader, who was masked to the first grader's assessment (Online Supplement part C). This grader performed a finer evaluation of each lesion across each subfield within the grading grid according to the Wisconsin Age-Related Maculopathy Grading System (WARMGS).<sup>20,21</sup> A comparison for agreement between the first and second grading for all lesions was then made. If there was a predefined clinically meaningful disagreement between the gradings (e.g., absence/presence of a lesion, small/medium/large size area of drusen present, most severe type of drusen present), the photographs were re-evaluated by another grader for the lesions in disagreement. For comparisons between AMD gradings across visits, a longitudinal review was performed. During the process, the grader was asked to review the photographs from two visits (masked to which visit came first in time) when the grading suggested there was a change (progression, regression, or incidence) of a lesion. This was to confirm that the change (no matter the direction) was real and not a result of difference in photograph quality or grader variability. A subset of eyes with no change between two visits also underwent longitudinal review to evaluate possible false negative changes in these eyes. Finally, the co-principal investigator (RK) reviewed photographs of all incident late AMD cases and confounding conditions such as macular

dystrophy, pathologic myopia, or chloroquine retinopathy.<sup>23-27</sup> A 3-step and a 6-step AMD severity scale were developed from this grading system (Online Supplement parts D-E).<sup>28</sup>

### Blue Mountains Eye Study (BMES)

In 1992, 4,433 eligible permanent residents aged 49 years and older were identified in two postcode areas near Sydney, Australia. From January 1992 to January 1994 (baseline survey), 3,654 persons (82.4%) were examined and 3,568 (97.6%) or 3,583 (98%) had gradable retinal photographs of both eyes or at least one eye, respectively.<sup>29</sup> There have been three follow-up examinations spaced approximately 5 years apart. In the most recent study phase, 1,149 persons (56.1% of survivors) were examined between 2007 and 2010.

Methods were unchanged across examinations except for additions to the protocol and a change from a film to a digital fundus camera at the most recent examination. At the first three visits, 30° stereoscopic color retinal photographs of the macula and five other retinal fields of both eyes were taken using a film fundus camera (Zeiss FF3, Carl Zeiss, Oberkochen, Germany).<sup>29-31</sup> A 40° digital camera (Canon CF-60 DSi with a Canon EoS 1DS Mark II camera body, Canon Inc., Tokyo, Japan) was used at the fourth visit.

Similar masked photographic grading for AMD lesions was performed following a modification of the WARMGS<sup>20</sup> and the International Age-Related Maculopathy Grading System (IARMGS)<sup>32</sup> (Online Supplement part F). However, modifications were made to the grading scheme that had been used in the BDES. Lesions were grouped into three zones of the grid (the center, inner, and outer zones) instead of nine subfields. Additionally, the BMES grader employed a hierarchy for grading lesions; the end-stage lesions were graded first, then retinal pigment epithelium (RPE) abnormalities, and finally drusen. RPE abnormalities and drusen were not assessed in persons with signs of late AMD. A single grader performed a detailed grading for all AMD lesions in all persons. If the grader had questions about the lesions graded, confirmation was obtained from the principal investigator (PM, confirming all late AMD cases) or other senior researcher (JJW, confirming questionable early AMD lesions and all incident AMD cases).

After the initial grading, side-by-side comparisons of the baseline and each of three follow-up examination photographs (5-, 10- and 15-year) were performed for any new AMD lesions identified at any follow-up examination. A 3-step AMD severity scale was developed from this grading system (Online Supplement part G).

### Los Angeles Latino Eye Study (LALES)

The cohort consisted of 7,789 self-identified Latinos aged 40 years and older identified from lists of households living in six census tracts in and around the city of La Puente, Los Angeles County, California.<sup>33,34</sup> At the baseline examination from 2000 to 2003, 6,357 persons (82%) were examined, of whom 5,875 (92.4%) had gradable retinal photographs for AMD. One follow-up study cycle was completed in which 4,658 persons were examined from 2004 to 2008.<sup>35</sup> A second follow-up cycle started in 2010 and is scheduled to be completed in late 2013 or early 2014.

Methods were unchanged across all examinations except for additions to the protocol and a change from film to digital fundus camera at the current follow-up examination. At the first two examinations, 30° stereoscopic color retinal photographs of the macula and other retinal fields of both eyes were taken using a film fundus camera (Zeiss FF450+, Carl Zeiss, Oberkochen, Germany).<sup>34</sup> During the current follow-up examination phase, 30° digital stereoscopic color retinal photographs of the macula and other retinal fields of both eyes were taken with a with an 11 megapixel digital fundus camera back (TRC-50DX, Topcon America Corporation, Paramus, NJ).

Modified WARMGS<sup>20</sup> photographic and grading protocols were adapted by the University of Wisconsin Ocular Epidemiology Group (UWOEG) in Madison, Wisconsin, United States to grade AMD and other retinal conditions in the LALES. The LALES used the same grids as the other three studies (Figure 1) to define the macular subfields and measure the size and area of the lesions. The BDES grading form was simplified to provide evaluation of the most severe size, type, or area of each AMD lesion within the grid and to provide a count of the number of subfields affected by each lesion. This simplification of the BDES AMD grading form still allowed for direct comparison of lesions and severity across studies. Masked photographic grading for AMD lesions was performed as described for the BDES except when the gradings differed among the preliminary graders (Online Supplement part H), detail graders (Online Supplement part I), and edit graders; if they differed, an adjudication was performed by the co-principal investigator (RK) of the UWOEG.<sup>34</sup> A 3-step AMD severity scale and the Age-Related Eye Diseases Study (AREDS) AMD severity scale have been used to define the prevalence and incidence and progression of AMD in publications from the LALES (Online Supplement parts D and J).<sup>36</sup>

### Rotterdam Study (RS)

The RS cohort consisted of 7,983 of the 10,275 eligible residents identified in January 1989 aged 55 to 106 years living in Ommoord, a suburb of Rotterdam, the Netherlands.<sup>37</sup> Of the 7,983 participants, 6,780 underwent an ophthalmologic examination from July 1989 to September 1993, and 6,419 (94.7%) had retinal photographs gradable for AMD. There have been four follow-up examination cycles. In the most recent study phase, 1,658 persons were examined between 2009 and 2011.<sup>38,39</sup>

Methods were unchanged across all examinations except for additions to the examination protocol and change from a film fundus camera to a digital one at the third follow-up examination. For the first three examinations, stereoscopic 35° fundus photographs of fields 1 and 2 were taken with a film fundus camera (Topcon TRV-50VT, Topcon Optical Company, Tokyo, Japan), while for the last two examinations a Topcon digital 35° fundus camera (Topcon TRC 50EX with a Sony DXC-950P digital camera; 0.44 megapixel) was used with the Wisconsin grid supplied with Topcon's Imagenet.

Modifications of the WARMGS and IARMGS were used.<sup>21,32</sup> The same two graders evaluated AMD lesions at all examinations: two graders for the first three phases and one grader for the last two examinations (Online Supplement part K). At baseline, fundus transparencies of the entire cohort were graded in a detailed manner to identify all features of AMD in the macular grid area (radius 3000 µm). At follow-up, all fundus transparencies of the entire cohort were graded for presence of AMD using

side-by-side grading with the transparencies of the baseline phase. Graders were not masked to date of examination. Consensus sessions and between-grader comparisons were performed regularly. Weighted kappa values ranged from 0.60 for hard drusen (<63  $\mu\text{m}$ ) to 0.88 for drusen area. All photographs with suspected late AMD were referred to principal investigators (PTDJ, JRV, CCWK) at the time of each examination phase to confirm the grading. A 4-step mutually exclusive AMD severity scale was developed from this grading system (Online Supplement part L).<sup>40</sup>

B. Beaver Dam Eye Study preliminary grading form

ID # \_\_\_\_\_ NAME CODE \_\_\_\_\_

The Beaver Dam Eye Study V  
Preliminary Grading Form

6000 Grader \_\_\_\_\_

6002 Date \_\_\_\_/\_\_\_\_/\_\_\_\_

NAME \_\_\_\_\_

| OD - FUNDUS PHOTO                                                                                                                                                                                                                                                                                                                                                                                                                                                                                                                                                                                                                                                     |                                     |       |          |      |      |    |      |    |            |   |   |                  |              |            |   |      |    |     |             |              |   |   |   |            |   |   |              |   |                                                                                                                                                            |                                                                                                                                                                                |                                                                                                                                                                                                     |      |        |           |   |   |  |   |   |   |                                                                                                                                                                               |                                                                                                                                             |                                                                                                                                                                                                                                                                                                                                                                                             |      |      |    |    |   |   |   |   |   |   |   |   |   |   |   |   |   |   |                                                                                                                                                                                                                                                                                                                                                                                                                              |      |      |    |    |   |   |   |   |   |   |   |   |   |   |   |   |   |   |   |   |                                                                         |                                                                                                                                                                                                                                                                                                                                                            |      |      |    |    |   |   |   |   |   |   |   |   |   |   |   |   |                                                                                                                              |                                                                                                                                                                                                                                                                   |             |               |   |                                     |   |                       |                                                                                                                      |                                                            |                                                                                                                                                                                                                           |               |  |  |      |        |       |  |  |  |
|-----------------------------------------------------------------------------------------------------------------------------------------------------------------------------------------------------------------------------------------------------------------------------------------------------------------------------------------------------------------------------------------------------------------------------------------------------------------------------------------------------------------------------------------------------------------------------------------------------------------------------------------------------------------------|-------------------------------------|-------|----------|------|------|----|------|----|------------|---|---|------------------|--------------|------------|---|------|----|-----|-------------|--------------|---|---|---|------------|---|---|--------------|---|------------------------------------------------------------------------------------------------------------------------------------------------------------|--------------------------------------------------------------------------------------------------------------------------------------------------------------------------------|-----------------------------------------------------------------------------------------------------------------------------------------------------------------------------------------------------|------|--------|-----------|---|---|--|---|---|---|-------------------------------------------------------------------------------------------------------------------------------------------------------------------------------|---------------------------------------------------------------------------------------------------------------------------------------------|---------------------------------------------------------------------------------------------------------------------------------------------------------------------------------------------------------------------------------------------------------------------------------------------------------------------------------------------------------------------------------------------|------|------|----|----|---|---|---|---|---|---|---|---|---|---|---|---|---|---|------------------------------------------------------------------------------------------------------------------------------------------------------------------------------------------------------------------------------------------------------------------------------------------------------------------------------------------------------------------------------------------------------------------------------|------|------|----|----|---|---|---|---|---|---|---|---|---|---|---|---|---|---|---|---|-------------------------------------------------------------------------|------------------------------------------------------------------------------------------------------------------------------------------------------------------------------------------------------------------------------------------------------------------------------------------------------------------------------------------------------------|------|------|----|----|---|---|---|---|---|---|---|---|---|---|---|---|------------------------------------------------------------------------------------------------------------------------------|-------------------------------------------------------------------------------------------------------------------------------------------------------------------------------------------------------------------------------------------------------------------|-------------|---------------|---|-------------------------------------|---|-----------------------|----------------------------------------------------------------------------------------------------------------------|------------------------------------------------------------|---------------------------------------------------------------------------------------------------------------------------------------------------------------------------------------------------------------------------|---------------|--|--|------|--------|-------|--|--|--|
| <b>OD</b><br>ZEISS PHOTO QUALITY<br><table border="1" style="width:100%; border-collapse: collapse;"> <tr> <th colspan="3">OD</th> <th colspan="3">GRAD</th> </tr> <tr> <th>Ab</th> <th>Pr</th> <th>Dig</th> <th>N</th> <th>Y</th> <th>G/F</th> </tr> <tr> <td>6020 Field 1</td> <td>0</td> <td>2</td> <td>3</td> <td>0</td> <td>1</td> <td>2</td> </tr> <tr> <td>6030 Field 2</td> <td>0</td> <td>2</td> <td>3</td> <td>0</td> <td>1</td> <td>2</td> </tr> <tr> <td>6040 Field 3</td> <td>0</td> <td>2</td> <td></td> <td>0</td> <td>1</td> <td>2</td> </tr> <tr> <td>6050 Iris</td> <td>0</td> <td>2</td> <td></td> <td>0</td> <td>1</td> <td>2</td> </tr> </table> | OD                                  |       |          | GRAD |      |    | Ab   | Pr | Dig        | N | Y | G/F              | 6020 Field 1 | 0          | 2 | 3    | 0  | 1   | 2           | 6030 Field 2 | 0 | 2 | 3 | 0          | 1 | 2 | 6040 Field 3 | 0 | 2                                                                                                                                                          |                                                                                                                                                                                | 0                                                                                                                                                                                                   | 1    | 2      | 6050 Iris | 0 | 2 |  | 0 | 1 | 2 | <b>6085 C/D</b> 0.____<br>(CG = ~)<br>None<br>Quest/Stip<br><b>6100 Diab-Ret-Lev*</b><br><div style="border: 1px solid black; width: 50px; height: 30px; margin: 5px;"></div> | <b>DRU-SIZE</b><br>None<br>Quest/Stip<br>< Std C <sub>0</sub><br>< Std C <sub>1</sub><br>< Std C <sub>2</sub><br>≥ Std C <sub>2</sub><br>CG | <table border="1" style="width:100%; border-collapse: collapse;"> <tr> <th>6170</th> <th>6180</th> </tr> <tr> <th>F2</th> <th>OG</th> </tr> <tr> <td>0</td> <td>0</td> </tr> <tr> <td>1</td> <td>1</td> </tr> <tr> <td>2</td> <td>2</td> </tr> <tr> <td>3</td> <td>3</td> </tr> <tr> <td>4</td> <td>4</td> </tr> <tr> <td>5</td> <td>5</td> </tr> <tr> <td>8</td> <td>8</td> </tr> </table> | 6170 | 6180 | F2 | OG | 0 | 0 | 1 | 1 | 2 | 2 | 3 | 3 | 4 | 4 | 5 | 5 | 8 | 8 | <table border="1" style="width:100%; border-collapse: collapse;"> <tr> <th>6175</th> <th>6185</th> </tr> <tr> <th>F2</th> <th>OG</th> </tr> <tr> <td>0</td> <td>0</td> </tr> <tr> <td>1</td> <td>1</td> </tr> <tr> <td>2</td> <td>2</td> </tr> <tr> <td>3</td> <td>3</td> </tr> <tr> <td>4</td> <td>4</td> </tr> <tr> <td>5</td> <td>5</td> </tr> <tr> <td>6</td> <td>6</td> </tr> <tr> <td>8</td> <td>8</td> </tr> </table> | 6175 | 6185 | F2 | OG | 0 | 0 | 1 | 1 | 2 | 2 | 3 | 3 | 4 | 4 | 5 | 5 | 6 | 6 | 8 | 8 | <b>SOFT</b><br>Absent<br>Quest<br>Dist only<br>Indis only<br>Both<br>CG | <table border="1" style="width:100%; border-collapse: collapse;"> <tr> <th>6190</th> <th>6195</th> </tr> <tr> <th>F2</th> <th>OG</th> </tr> <tr> <td>0</td> <td>0</td> </tr> <tr> <td>1</td> <td>1</td> </tr> <tr> <td>2</td> <td>2</td> </tr> <tr> <td>3</td> <td>3</td> </tr> <tr> <td>4</td> <td>4</td> </tr> <tr> <td>8</td> <td>8</td> </tr> </table> | 6190 | 6195 | F2 | OG | 0 | 0 | 1 | 1 | 2 | 2 | 3 | 3 | 4 | 4 | 8 | 8 | <b>6210 HYP-PIG</b><br>Absent<br>Quest<br>< C <sub>0</sub><br>< C <sub>1</sub><br>< C <sub>2</sub><br>≥ C <sub>2</sub><br>CG | <table border="1" style="width:100%; border-collapse: collapse;"> <tr> <th>6215 ARM SC</th> <th>6220 ARM PROG</th> </tr> <tr> <td>0</td> <td>Better<br/>Same<br/>Worse<br/>CG<br/>NA</td> </tr> <tr> <td>0</td> <td>0<br/>1<br/>2<br/>8<br/>9</td> </tr> </table> | 6215 ARM SC | 6220 ARM PROG | 0 | Better<br>Same<br>Worse<br>CG<br>NA | 0 | 0<br>1<br>2<br>8<br>9 | <b>6200 RPE-DEP</b><br>Absent<br>Quest<br>< Std C <sub>2</sub><br>< Std O <sub>2</sub><br>≥ Std O <sub>2</sub><br>CG | <b>6205 RPE-DEP-CC</b><br>Absent<br>Quest<br>Present<br>CG | <table border="1" style="width:100%; border-collapse: collapse;"> <tr> <th colspan="3">6225 ARM FLAG</th> </tr> <tr> <th>0 No</th> <th>1 Qual</th> <th>2 Oth</th> </tr> <tr> <td></td> <td></td> <td></td> </tr> </table> | 6225 ARM FLAG |  |  | 0 No | 1 Qual | 2 Oth |  |  |  |
| OD                                                                                                                                                                                                                                                                                                                                                                                                                                                                                                                                                                                                                                                                    |                                     |       | GRAD     |      |      |    |      |    |            |   |   |                  |              |            |   |      |    |     |             |              |   |   |   |            |   |   |              |   |                                                                                                                                                            |                                                                                                                                                                                |                                                                                                                                                                                                     |      |        |           |   |   |  |   |   |   |                                                                                                                                                                               |                                                                                                                                             |                                                                                                                                                                                                                                                                                                                                                                                             |      |      |    |    |   |   |   |   |   |   |   |   |   |   |   |   |   |   |                                                                                                                                                                                                                                                                                                                                                                                                                              |      |      |    |    |   |   |   |   |   |   |   |   |   |   |   |   |   |   |   |   |                                                                         |                                                                                                                                                                                                                                                                                                                                                            |      |      |    |    |   |   |   |   |   |   |   |   |   |   |   |   |                                                                                                                              |                                                                                                                                                                                                                                                                   |             |               |   |                                     |   |                       |                                                                                                                      |                                                            |                                                                                                                                                                                                                           |               |  |  |      |        |       |  |  |  |
| Ab                                                                                                                                                                                                                                                                                                                                                                                                                                                                                                                                                                                                                                                                    | Pr                                  | Dig   | N        | Y    | G/F  |    |      |    |            |   |   |                  |              |            |   |      |    |     |             |              |   |   |   |            |   |   |              |   |                                                                                                                                                            |                                                                                                                                                                                |                                                                                                                                                                                                     |      |        |           |   |   |  |   |   |   |                                                                                                                                                                               |                                                                                                                                             |                                                                                                                                                                                                                                                                                                                                                                                             |      |      |    |    |   |   |   |   |   |   |   |   |   |   |   |   |   |   |                                                                                                                                                                                                                                                                                                                                                                                                                              |      |      |    |    |   |   |   |   |   |   |   |   |   |   |   |   |   |   |   |   |                                                                         |                                                                                                                                                                                                                                                                                                                                                            |      |      |    |    |   |   |   |   |   |   |   |   |   |   |   |   |                                                                                                                              |                                                                                                                                                                                                                                                                   |             |               |   |                                     |   |                       |                                                                                                                      |                                                            |                                                                                                                                                                                                                           |               |  |  |      |        |       |  |  |  |
| 6020 Field 1                                                                                                                                                                                                                                                                                                                                                                                                                                                                                                                                                                                                                                                          | 0                                   | 2     | 3        | 0    | 1    | 2  |      |    |            |   |   |                  |              |            |   |      |    |     |             |              |   |   |   |            |   |   |              |   |                                                                                                                                                            |                                                                                                                                                                                |                                                                                                                                                                                                     |      |        |           |   |   |  |   |   |   |                                                                                                                                                                               |                                                                                                                                             |                                                                                                                                                                                                                                                                                                                                                                                             |      |      |    |    |   |   |   |   |   |   |   |   |   |   |   |   |   |   |                                                                                                                                                                                                                                                                                                                                                                                                                              |      |      |    |    |   |   |   |   |   |   |   |   |   |   |   |   |   |   |   |   |                                                                         |                                                                                                                                                                                                                                                                                                                                                            |      |      |    |    |   |   |   |   |   |   |   |   |   |   |   |   |                                                                                                                              |                                                                                                                                                                                                                                                                   |             |               |   |                                     |   |                       |                                                                                                                      |                                                            |                                                                                                                                                                                                                           |               |  |  |      |        |       |  |  |  |
| 6030 Field 2                                                                                                                                                                                                                                                                                                                                                                                                                                                                                                                                                                                                                                                          | 0                                   | 2     | 3        | 0    | 1    | 2  |      |    |            |   |   |                  |              |            |   |      |    |     |             |              |   |   |   |            |   |   |              |   |                                                                                                                                                            |                                                                                                                                                                                |                                                                                                                                                                                                     |      |        |           |   |   |  |   |   |   |                                                                                                                                                                               |                                                                                                                                             |                                                                                                                                                                                                                                                                                                                                                                                             |      |      |    |    |   |   |   |   |   |   |   |   |   |   |   |   |   |   |                                                                                                                                                                                                                                                                                                                                                                                                                              |      |      |    |    |   |   |   |   |   |   |   |   |   |   |   |   |   |   |   |   |                                                                         |                                                                                                                                                                                                                                                                                                                                                            |      |      |    |    |   |   |   |   |   |   |   |   |   |   |   |   |                                                                                                                              |                                                                                                                                                                                                                                                                   |             |               |   |                                     |   |                       |                                                                                                                      |                                                            |                                                                                                                                                                                                                           |               |  |  |      |        |       |  |  |  |
| 6040 Field 3                                                                                                                                                                                                                                                                                                                                                                                                                                                                                                                                                                                                                                                          | 0                                   | 2     |          | 0    | 1    | 2  |      |    |            |   |   |                  |              |            |   |      |    |     |             |              |   |   |   |            |   |   |              |   |                                                                                                                                                            |                                                                                                                                                                                |                                                                                                                                                                                                     |      |        |           |   |   |  |   |   |   |                                                                                                                                                                               |                                                                                                                                             |                                                                                                                                                                                                                                                                                                                                                                                             |      |      |    |    |   |   |   |   |   |   |   |   |   |   |   |   |   |   |                                                                                                                                                                                                                                                                                                                                                                                                                              |      |      |    |    |   |   |   |   |   |   |   |   |   |   |   |   |   |   |   |   |                                                                         |                                                                                                                                                                                                                                                                                                                                                            |      |      |    |    |   |   |   |   |   |   |   |   |   |   |   |   |                                                                                                                              |                                                                                                                                                                                                                                                                   |             |               |   |                                     |   |                       |                                                                                                                      |                                                            |                                                                                                                                                                                                                           |               |  |  |      |        |       |  |  |  |
| 6050 Iris                                                                                                                                                                                                                                                                                                                                                                                                                                                                                                                                                                                                                                                             | 0                                   | 2     |          | 0    | 1    | 2  |      |    |            |   |   |                  |              |            |   |      |    |     |             |              |   |   |   |            |   |   |              |   |                                                                                                                                                            |                                                                                                                                                                                |                                                                                                                                                                                                     |      |        |           |   |   |  |   |   |   |                                                                                                                                                                               |                                                                                                                                             |                                                                                                                                                                                                                                                                                                                                                                                             |      |      |    |    |   |   |   |   |   |   |   |   |   |   |   |   |   |   |                                                                                                                                                                                                                                                                                                                                                                                                                              |      |      |    |    |   |   |   |   |   |   |   |   |   |   |   |   |   |   |   |   |                                                                         |                                                                                                                                                                                                                                                                                                                                                            |      |      |    |    |   |   |   |   |   |   |   |   |   |   |   |   |                                                                                                                              |                                                                                                                                                                                                                                                                   |             |               |   |                                     |   |                       |                                                                                                                      |                                                            |                                                                                                                                                                                                                           |               |  |  |      |        |       |  |  |  |
| 6170                                                                                                                                                                                                                                                                                                                                                                                                                                                                                                                                                                                                                                                                  | 6180                                |       |          |      |      |    |      |    |            |   |   |                  |              |            |   |      |    |     |             |              |   |   |   |            |   |   |              |   |                                                                                                                                                            |                                                                                                                                                                                |                                                                                                                                                                                                     |      |        |           |   |   |  |   |   |   |                                                                                                                                                                               |                                                                                                                                             |                                                                                                                                                                                                                                                                                                                                                                                             |      |      |    |    |   |   |   |   |   |   |   |   |   |   |   |   |   |   |                                                                                                                                                                                                                                                                                                                                                                                                                              |      |      |    |    |   |   |   |   |   |   |   |   |   |   |   |   |   |   |   |   |                                                                         |                                                                                                                                                                                                                                                                                                                                                            |      |      |    |    |   |   |   |   |   |   |   |   |   |   |   |   |                                                                                                                              |                                                                                                                                                                                                                                                                   |             |               |   |                                     |   |                       |                                                                                                                      |                                                            |                                                                                                                                                                                                                           |               |  |  |      |        |       |  |  |  |
| F2                                                                                                                                                                                                                                                                                                                                                                                                                                                                                                                                                                                                                                                                    | OG                                  |       |          |      |      |    |      |    |            |   |   |                  |              |            |   |      |    |     |             |              |   |   |   |            |   |   |              |   |                                                                                                                                                            |                                                                                                                                                                                |                                                                                                                                                                                                     |      |        |           |   |   |  |   |   |   |                                                                                                                                                                               |                                                                                                                                             |                                                                                                                                                                                                                                                                                                                                                                                             |      |      |    |    |   |   |   |   |   |   |   |   |   |   |   |   |   |   |                                                                                                                                                                                                                                                                                                                                                                                                                              |      |      |    |    |   |   |   |   |   |   |   |   |   |   |   |   |   |   |   |   |                                                                         |                                                                                                                                                                                                                                                                                                                                                            |      |      |    |    |   |   |   |   |   |   |   |   |   |   |   |   |                                                                                                                              |                                                                                                                                                                                                                                                                   |             |               |   |                                     |   |                       |                                                                                                                      |                                                            |                                                                                                                                                                                                                           |               |  |  |      |        |       |  |  |  |
| 0                                                                                                                                                                                                                                                                                                                                                                                                                                                                                                                                                                                                                                                                     | 0                                   |       |          |      |      |    |      |    |            |   |   |                  |              |            |   |      |    |     |             |              |   |   |   |            |   |   |              |   |                                                                                                                                                            |                                                                                                                                                                                |                                                                                                                                                                                                     |      |        |           |   |   |  |   |   |   |                                                                                                                                                                               |                                                                                                                                             |                                                                                                                                                                                                                                                                                                                                                                                             |      |      |    |    |   |   |   |   |   |   |   |   |   |   |   |   |   |   |                                                                                                                                                                                                                                                                                                                                                                                                                              |      |      |    |    |   |   |   |   |   |   |   |   |   |   |   |   |   |   |   |   |                                                                         |                                                                                                                                                                                                                                                                                                                                                            |      |      |    |    |   |   |   |   |   |   |   |   |   |   |   |   |                                                                                                                              |                                                                                                                                                                                                                                                                   |             |               |   |                                     |   |                       |                                                                                                                      |                                                            |                                                                                                                                                                                                                           |               |  |  |      |        |       |  |  |  |
| 1                                                                                                                                                                                                                                                                                                                                                                                                                                                                                                                                                                                                                                                                     | 1                                   |       |          |      |      |    |      |    |            |   |   |                  |              |            |   |      |    |     |             |              |   |   |   |            |   |   |              |   |                                                                                                                                                            |                                                                                                                                                                                |                                                                                                                                                                                                     |      |        |           |   |   |  |   |   |   |                                                                                                                                                                               |                                                                                                                                             |                                                                                                                                                                                                                                                                                                                                                                                             |      |      |    |    |   |   |   |   |   |   |   |   |   |   |   |   |   |   |                                                                                                                                                                                                                                                                                                                                                                                                                              |      |      |    |    |   |   |   |   |   |   |   |   |   |   |   |   |   |   |   |   |                                                                         |                                                                                                                                                                                                                                                                                                                                                            |      |      |    |    |   |   |   |   |   |   |   |   |   |   |   |   |                                                                                                                              |                                                                                                                                                                                                                                                                   |             |               |   |                                     |   |                       |                                                                                                                      |                                                            |                                                                                                                                                                                                                           |               |  |  |      |        |       |  |  |  |
| 2                                                                                                                                                                                                                                                                                                                                                                                                                                                                                                                                                                                                                                                                     | 2                                   |       |          |      |      |    |      |    |            |   |   |                  |              |            |   |      |    |     |             |              |   |   |   |            |   |   |              |   |                                                                                                                                                            |                                                                                                                                                                                |                                                                                                                                                                                                     |      |        |           |   |   |  |   |   |   |                                                                                                                                                                               |                                                                                                                                             |                                                                                                                                                                                                                                                                                                                                                                                             |      |      |    |    |   |   |   |   |   |   |   |   |   |   |   |   |   |   |                                                                                                                                                                                                                                                                                                                                                                                                                              |      |      |    |    |   |   |   |   |   |   |   |   |   |   |   |   |   |   |   |   |                                                                         |                                                                                                                                                                                                                                                                                                                                                            |      |      |    |    |   |   |   |   |   |   |   |   |   |   |   |   |                                                                                                                              |                                                                                                                                                                                                                                                                   |             |               |   |                                     |   |                       |                                                                                                                      |                                                            |                                                                                                                                                                                                                           |               |  |  |      |        |       |  |  |  |
| 3                                                                                                                                                                                                                                                                                                                                                                                                                                                                                                                                                                                                                                                                     | 3                                   |       |          |      |      |    |      |    |            |   |   |                  |              |            |   |      |    |     |             |              |   |   |   |            |   |   |              |   |                                                                                                                                                            |                                                                                                                                                                                |                                                                                                                                                                                                     |      |        |           |   |   |  |   |   |   |                                                                                                                                                                               |                                                                                                                                             |                                                                                                                                                                                                                                                                                                                                                                                             |      |      |    |    |   |   |   |   |   |   |   |   |   |   |   |   |   |   |                                                                                                                                                                                                                                                                                                                                                                                                                              |      |      |    |    |   |   |   |   |   |   |   |   |   |   |   |   |   |   |   |   |                                                                         |                                                                                                                                                                                                                                                                                                                                                            |      |      |    |    |   |   |   |   |   |   |   |   |   |   |   |   |                                                                                                                              |                                                                                                                                                                                                                                                                   |             |               |   |                                     |   |                       |                                                                                                                      |                                                            |                                                                                                                                                                                                                           |               |  |  |      |        |       |  |  |  |
| 4                                                                                                                                                                                                                                                                                                                                                                                                                                                                                                                                                                                                                                                                     | 4                                   |       |          |      |      |    |      |    |            |   |   |                  |              |            |   |      |    |     |             |              |   |   |   |            |   |   |              |   |                                                                                                                                                            |                                                                                                                                                                                |                                                                                                                                                                                                     |      |        |           |   |   |  |   |   |   |                                                                                                                                                                               |                                                                                                                                             |                                                                                                                                                                                                                                                                                                                                                                                             |      |      |    |    |   |   |   |   |   |   |   |   |   |   |   |   |   |   |                                                                                                                                                                                                                                                                                                                                                                                                                              |      |      |    |    |   |   |   |   |   |   |   |   |   |   |   |   |   |   |   |   |                                                                         |                                                                                                                                                                                                                                                                                                                                                            |      |      |    |    |   |   |   |   |   |   |   |   |   |   |   |   |                                                                                                                              |                                                                                                                                                                                                                                                                   |             |               |   |                                     |   |                       |                                                                                                                      |                                                            |                                                                                                                                                                                                                           |               |  |  |      |        |       |  |  |  |
| 5                                                                                                                                                                                                                                                                                                                                                                                                                                                                                                                                                                                                                                                                     | 5                                   |       |          |      |      |    |      |    |            |   |   |                  |              |            |   |      |    |     |             |              |   |   |   |            |   |   |              |   |                                                                                                                                                            |                                                                                                                                                                                |                                                                                                                                                                                                     |      |        |           |   |   |  |   |   |   |                                                                                                                                                                               |                                                                                                                                             |                                                                                                                                                                                                                                                                                                                                                                                             |      |      |    |    |   |   |   |   |   |   |   |   |   |   |   |   |   |   |                                                                                                                                                                                                                                                                                                                                                                                                                              |      |      |    |    |   |   |   |   |   |   |   |   |   |   |   |   |   |   |   |   |                                                                         |                                                                                                                                                                                                                                                                                                                                                            |      |      |    |    |   |   |   |   |   |   |   |   |   |   |   |   |                                                                                                                              |                                                                                                                                                                                                                                                                   |             |               |   |                                     |   |                       |                                                                                                                      |                                                            |                                                                                                                                                                                                                           |               |  |  |      |        |       |  |  |  |
| 8                                                                                                                                                                                                                                                                                                                                                                                                                                                                                                                                                                                                                                                                     | 8                                   |       |          |      |      |    |      |    |            |   |   |                  |              |            |   |      |    |     |             |              |   |   |   |            |   |   |              |   |                                                                                                                                                            |                                                                                                                                                                                |                                                                                                                                                                                                     |      |        |           |   |   |  |   |   |   |                                                                                                                                                                               |                                                                                                                                             |                                                                                                                                                                                                                                                                                                                                                                                             |      |      |    |    |   |   |   |   |   |   |   |   |   |   |   |   |   |   |                                                                                                                                                                                                                                                                                                                                                                                                                              |      |      |    |    |   |   |   |   |   |   |   |   |   |   |   |   |   |   |   |   |                                                                         |                                                                                                                                                                                                                                                                                                                                                            |      |      |    |    |   |   |   |   |   |   |   |   |   |   |   |   |                                                                                                                              |                                                                                                                                                                                                                                                                   |             |               |   |                                     |   |                       |                                                                                                                      |                                                            |                                                                                                                                                                                                                           |               |  |  |      |        |       |  |  |  |
| 6175                                                                                                                                                                                                                                                                                                                                                                                                                                                                                                                                                                                                                                                                  | 6185                                |       |          |      |      |    |      |    |            |   |   |                  |              |            |   |      |    |     |             |              |   |   |   |            |   |   |              |   |                                                                                                                                                            |                                                                                                                                                                                |                                                                                                                                                                                                     |      |        |           |   |   |  |   |   |   |                                                                                                                                                                               |                                                                                                                                             |                                                                                                                                                                                                                                                                                                                                                                                             |      |      |    |    |   |   |   |   |   |   |   |   |   |   |   |   |   |   |                                                                                                                                                                                                                                                                                                                                                                                                                              |      |      |    |    |   |   |   |   |   |   |   |   |   |   |   |   |   |   |   |   |                                                                         |                                                                                                                                                                                                                                                                                                                                                            |      |      |    |    |   |   |   |   |   |   |   |   |   |   |   |   |                                                                                                                              |                                                                                                                                                                                                                                                                   |             |               |   |                                     |   |                       |                                                                                                                      |                                                            |                                                                                                                                                                                                                           |               |  |  |      |        |       |  |  |  |
| F2                                                                                                                                                                                                                                                                                                                                                                                                                                                                                                                                                                                                                                                                    | OG                                  |       |          |      |      |    |      |    |            |   |   |                  |              |            |   |      |    |     |             |              |   |   |   |            |   |   |              |   |                                                                                                                                                            |                                                                                                                                                                                |                                                                                                                                                                                                     |      |        |           |   |   |  |   |   |   |                                                                                                                                                                               |                                                                                                                                             |                                                                                                                                                                                                                                                                                                                                                                                             |      |      |    |    |   |   |   |   |   |   |   |   |   |   |   |   |   |   |                                                                                                                                                                                                                                                                                                                                                                                                                              |      |      |    |    |   |   |   |   |   |   |   |   |   |   |   |   |   |   |   |   |                                                                         |                                                                                                                                                                                                                                                                                                                                                            |      |      |    |    |   |   |   |   |   |   |   |   |   |   |   |   |                                                                                                                              |                                                                                                                                                                                                                                                                   |             |               |   |                                     |   |                       |                                                                                                                      |                                                            |                                                                                                                                                                                                                           |               |  |  |      |        |       |  |  |  |
| 0                                                                                                                                                                                                                                                                                                                                                                                                                                                                                                                                                                                                                                                                     | 0                                   |       |          |      |      |    |      |    |            |   |   |                  |              |            |   |      |    |     |             |              |   |   |   |            |   |   |              |   |                                                                                                                                                            |                                                                                                                                                                                |                                                                                                                                                                                                     |      |        |           |   |   |  |   |   |   |                                                                                                                                                                               |                                                                                                                                             |                                                                                                                                                                                                                                                                                                                                                                                             |      |      |    |    |   |   |   |   |   |   |   |   |   |   |   |   |   |   |                                                                                                                                                                                                                                                                                                                                                                                                                              |      |      |    |    |   |   |   |   |   |   |   |   |   |   |   |   |   |   |   |   |                                                                         |                                                                                                                                                                                                                                                                                                                                                            |      |      |    |    |   |   |   |   |   |   |   |   |   |   |   |   |                                                                                                                              |                                                                                                                                                                                                                                                                   |             |               |   |                                     |   |                       |                                                                                                                      |                                                            |                                                                                                                                                                                                                           |               |  |  |      |        |       |  |  |  |
| 1                                                                                                                                                                                                                                                                                                                                                                                                                                                                                                                                                                                                                                                                     | 1                                   |       |          |      |      |    |      |    |            |   |   |                  |              |            |   |      |    |     |             |              |   |   |   |            |   |   |              |   |                                                                                                                                                            |                                                                                                                                                                                |                                                                                                                                                                                                     |      |        |           |   |   |  |   |   |   |                                                                                                                                                                               |                                                                                                                                             |                                                                                                                                                                                                                                                                                                                                                                                             |      |      |    |    |   |   |   |   |   |   |   |   |   |   |   |   |   |   |                                                                                                                                                                                                                                                                                                                                                                                                                              |      |      |    |    |   |   |   |   |   |   |   |   |   |   |   |   |   |   |   |   |                                                                         |                                                                                                                                                                                                                                                                                                                                                            |      |      |    |    |   |   |   |   |   |   |   |   |   |   |   |   |                                                                                                                              |                                                                                                                                                                                                                                                                   |             |               |   |                                     |   |                       |                                                                                                                      |                                                            |                                                                                                                                                                                                                           |               |  |  |      |        |       |  |  |  |
| 2                                                                                                                                                                                                                                                                                                                                                                                                                                                                                                                                                                                                                                                                     | 2                                   |       |          |      |      |    |      |    |            |   |   |                  |              |            |   |      |    |     |             |              |   |   |   |            |   |   |              |   |                                                                                                                                                            |                                                                                                                                                                                |                                                                                                                                                                                                     |      |        |           |   |   |  |   |   |   |                                                                                                                                                                               |                                                                                                                                             |                                                                                                                                                                                                                                                                                                                                                                                             |      |      |    |    |   |   |   |   |   |   |   |   |   |   |   |   |   |   |                                                                                                                                                                                                                                                                                                                                                                                                                              |      |      |    |    |   |   |   |   |   |   |   |   |   |   |   |   |   |   |   |   |                                                                         |                                                                                                                                                                                                                                                                                                                                                            |      |      |    |    |   |   |   |   |   |   |   |   |   |   |   |   |                                                                                                                              |                                                                                                                                                                                                                                                                   |             |               |   |                                     |   |                       |                                                                                                                      |                                                            |                                                                                                                                                                                                                           |               |  |  |      |        |       |  |  |  |
| 3                                                                                                                                                                                                                                                                                                                                                                                                                                                                                                                                                                                                                                                                     | 3                                   |       |          |      |      |    |      |    |            |   |   |                  |              |            |   |      |    |     |             |              |   |   |   |            |   |   |              |   |                                                                                                                                                            |                                                                                                                                                                                |                                                                                                                                                                                                     |      |        |           |   |   |  |   |   |   |                                                                                                                                                                               |                                                                                                                                             |                                                                                                                                                                                                                                                                                                                                                                                             |      |      |    |    |   |   |   |   |   |   |   |   |   |   |   |   |   |   |                                                                                                                                                                                                                                                                                                                                                                                                                              |      |      |    |    |   |   |   |   |   |   |   |   |   |   |   |   |   |   |   |   |                                                                         |                                                                                                                                                                                                                                                                                                                                                            |      |      |    |    |   |   |   |   |   |   |   |   |   |   |   |   |                                                                                                                              |                                                                                                                                                                                                                                                                   |             |               |   |                                     |   |                       |                                                                                                                      |                                                            |                                                                                                                                                                                                                           |               |  |  |      |        |       |  |  |  |
| 4                                                                                                                                                                                                                                                                                                                                                                                                                                                                                                                                                                                                                                                                     | 4                                   |       |          |      |      |    |      |    |            |   |   |                  |              |            |   |      |    |     |             |              |   |   |   |            |   |   |              |   |                                                                                                                                                            |                                                                                                                                                                                |                                                                                                                                                                                                     |      |        |           |   |   |  |   |   |   |                                                                                                                                                                               |                                                                                                                                             |                                                                                                                                                                                                                                                                                                                                                                                             |      |      |    |    |   |   |   |   |   |   |   |   |   |   |   |   |   |   |                                                                                                                                                                                                                                                                                                                                                                                                                              |      |      |    |    |   |   |   |   |   |   |   |   |   |   |   |   |   |   |   |   |                                                                         |                                                                                                                                                                                                                                                                                                                                                            |      |      |    |    |   |   |   |   |   |   |   |   |   |   |   |   |                                                                                                                              |                                                                                                                                                                                                                                                                   |             |               |   |                                     |   |                       |                                                                                                                      |                                                            |                                                                                                                                                                                                                           |               |  |  |      |        |       |  |  |  |
| 5                                                                                                                                                                                                                                                                                                                                                                                                                                                                                                                                                                                                                                                                     | 5                                   |       |          |      |      |    |      |    |            |   |   |                  |              |            |   |      |    |     |             |              |   |   |   |            |   |   |              |   |                                                                                                                                                            |                                                                                                                                                                                |                                                                                                                                                                                                     |      |        |           |   |   |  |   |   |   |                                                                                                                                                                               |                                                                                                                                             |                                                                                                                                                                                                                                                                                                                                                                                             |      |      |    |    |   |   |   |   |   |   |   |   |   |   |   |   |   |   |                                                                                                                                                                                                                                                                                                                                                                                                                              |      |      |    |    |   |   |   |   |   |   |   |   |   |   |   |   |   |   |   |   |                                                                         |                                                                                                                                                                                                                                                                                                                                                            |      |      |    |    |   |   |   |   |   |   |   |   |   |   |   |   |                                                                                                                              |                                                                                                                                                                                                                                                                   |             |               |   |                                     |   |                       |                                                                                                                      |                                                            |                                                                                                                                                                                                                           |               |  |  |      |        |       |  |  |  |
| 6                                                                                                                                                                                                                                                                                                                                                                                                                                                                                                                                                                                                                                                                     | 6                                   |       |          |      |      |    |      |    |            |   |   |                  |              |            |   |      |    |     |             |              |   |   |   |            |   |   |              |   |                                                                                                                                                            |                                                                                                                                                                                |                                                                                                                                                                                                     |      |        |           |   |   |  |   |   |   |                                                                                                                                                                               |                                                                                                                                             |                                                                                                                                                                                                                                                                                                                                                                                             |      |      |    |    |   |   |   |   |   |   |   |   |   |   |   |   |   |   |                                                                                                                                                                                                                                                                                                                                                                                                                              |      |      |    |    |   |   |   |   |   |   |   |   |   |   |   |   |   |   |   |   |                                                                         |                                                                                                                                                                                                                                                                                                                                                            |      |      |    |    |   |   |   |   |   |   |   |   |   |   |   |   |                                                                                                                              |                                                                                                                                                                                                                                                                   |             |               |   |                                     |   |                       |                                                                                                                      |                                                            |                                                                                                                                                                                                                           |               |  |  |      |        |       |  |  |  |
| 8                                                                                                                                                                                                                                                                                                                                                                                                                                                                                                                                                                                                                                                                     | 8                                   |       |          |      |      |    |      |    |            |   |   |                  |              |            |   |      |    |     |             |              |   |   |   |            |   |   |              |   |                                                                                                                                                            |                                                                                                                                                                                |                                                                                                                                                                                                     |      |        |           |   |   |  |   |   |   |                                                                                                                                                                               |                                                                                                                                             |                                                                                                                                                                                                                                                                                                                                                                                             |      |      |    |    |   |   |   |   |   |   |   |   |   |   |   |   |   |   |                                                                                                                                                                                                                                                                                                                                                                                                                              |      |      |    |    |   |   |   |   |   |   |   |   |   |   |   |   |   |   |   |   |                                                                         |                                                                                                                                                                                                                                                                                                                                                            |      |      |    |    |   |   |   |   |   |   |   |   |   |   |   |   |                                                                                                                              |                                                                                                                                                                                                                                                                   |             |               |   |                                     |   |                       |                                                                                                                      |                                                            |                                                                                                                                                                                                                           |               |  |  |      |        |       |  |  |  |
| 6190                                                                                                                                                                                                                                                                                                                                                                                                                                                                                                                                                                                                                                                                  | 6195                                |       |          |      |      |    |      |    |            |   |   |                  |              |            |   |      |    |     |             |              |   |   |   |            |   |   |              |   |                                                                                                                                                            |                                                                                                                                                                                |                                                                                                                                                                                                     |      |        |           |   |   |  |   |   |   |                                                                                                                                                                               |                                                                                                                                             |                                                                                                                                                                                                                                                                                                                                                                                             |      |      |    |    |   |   |   |   |   |   |   |   |   |   |   |   |   |   |                                                                                                                                                                                                                                                                                                                                                                                                                              |      |      |    |    |   |   |   |   |   |   |   |   |   |   |   |   |   |   |   |   |                                                                         |                                                                                                                                                                                                                                                                                                                                                            |      |      |    |    |   |   |   |   |   |   |   |   |   |   |   |   |                                                                                                                              |                                                                                                                                                                                                                                                                   |             |               |   |                                     |   |                       |                                                                                                                      |                                                            |                                                                                                                                                                                                                           |               |  |  |      |        |       |  |  |  |
| F2                                                                                                                                                                                                                                                                                                                                                                                                                                                                                                                                                                                                                                                                    | OG                                  |       |          |      |      |    |      |    |            |   |   |                  |              |            |   |      |    |     |             |              |   |   |   |            |   |   |              |   |                                                                                                                                                            |                                                                                                                                                                                |                                                                                                                                                                                                     |      |        |           |   |   |  |   |   |   |                                                                                                                                                                               |                                                                                                                                             |                                                                                                                                                                                                                                                                                                                                                                                             |      |      |    |    |   |   |   |   |   |   |   |   |   |   |   |   |   |   |                                                                                                                                                                                                                                                                                                                                                                                                                              |      |      |    |    |   |   |   |   |   |   |   |   |   |   |   |   |   |   |   |   |                                                                         |                                                                                                                                                                                                                                                                                                                                                            |      |      |    |    |   |   |   |   |   |   |   |   |   |   |   |   |                                                                                                                              |                                                                                                                                                                                                                                                                   |             |               |   |                                     |   |                       |                                                                                                                      |                                                            |                                                                                                                                                                                                                           |               |  |  |      |        |       |  |  |  |
| 0                                                                                                                                                                                                                                                                                                                                                                                                                                                                                                                                                                                                                                                                     | 0                                   |       |          |      |      |    |      |    |            |   |   |                  |              |            |   |      |    |     |             |              |   |   |   |            |   |   |              |   |                                                                                                                                                            |                                                                                                                                                                                |                                                                                                                                                                                                     |      |        |           |   |   |  |   |   |   |                                                                                                                                                                               |                                                                                                                                             |                                                                                                                                                                                                                                                                                                                                                                                             |      |      |    |    |   |   |   |   |   |   |   |   |   |   |   |   |   |   |                                                                                                                                                                                                                                                                                                                                                                                                                              |      |      |    |    |   |   |   |   |   |   |   |   |   |   |   |   |   |   |   |   |                                                                         |                                                                                                                                                                                                                                                                                                                                                            |      |      |    |    |   |   |   |   |   |   |   |   |   |   |   |   |                                                                                                                              |                                                                                                                                                                                                                                                                   |             |               |   |                                     |   |                       |                                                                                                                      |                                                            |                                                                                                                                                                                                                           |               |  |  |      |        |       |  |  |  |
| 1                                                                                                                                                                                                                                                                                                                                                                                                                                                                                                                                                                                                                                                                     | 1                                   |       |          |      |      |    |      |    |            |   |   |                  |              |            |   |      |    |     |             |              |   |   |   |            |   |   |              |   |                                                                                                                                                            |                                                                                                                                                                                |                                                                                                                                                                                                     |      |        |           |   |   |  |   |   |   |                                                                                                                                                                               |                                                                                                                                             |                                                                                                                                                                                                                                                                                                                                                                                             |      |      |    |    |   |   |   |   |   |   |   |   |   |   |   |   |   |   |                                                                                                                                                                                                                                                                                                                                                                                                                              |      |      |    |    |   |   |   |   |   |   |   |   |   |   |   |   |   |   |   |   |                                                                         |                                                                                                                                                                                                                                                                                                                                                            |      |      |    |    |   |   |   |   |   |   |   |   |   |   |   |   |                                                                                                                              |                                                                                                                                                                                                                                                                   |             |               |   |                                     |   |                       |                                                                                                                      |                                                            |                                                                                                                                                                                                                           |               |  |  |      |        |       |  |  |  |
| 2                                                                                                                                                                                                                                                                                                                                                                                                                                                                                                                                                                                                                                                                     | 2                                   |       |          |      |      |    |      |    |            |   |   |                  |              |            |   |      |    |     |             |              |   |   |   |            |   |   |              |   |                                                                                                                                                            |                                                                                                                                                                                |                                                                                                                                                                                                     |      |        |           |   |   |  |   |   |   |                                                                                                                                                                               |                                                                                                                                             |                                                                                                                                                                                                                                                                                                                                                                                             |      |      |    |    |   |   |   |   |   |   |   |   |   |   |   |   |   |   |                                                                                                                                                                                                                                                                                                                                                                                                                              |      |      |    |    |   |   |   |   |   |   |   |   |   |   |   |   |   |   |   |   |                                                                         |                                                                                                                                                                                                                                                                                                                                                            |      |      |    |    |   |   |   |   |   |   |   |   |   |   |   |   |                                                                                                                              |                                                                                                                                                                                                                                                                   |             |               |   |                                     |   |                       |                                                                                                                      |                                                            |                                                                                                                                                                                                                           |               |  |  |      |        |       |  |  |  |
| 3                                                                                                                                                                                                                                                                                                                                                                                                                                                                                                                                                                                                                                                                     | 3                                   |       |          |      |      |    |      |    |            |   |   |                  |              |            |   |      |    |     |             |              |   |   |   |            |   |   |              |   |                                                                                                                                                            |                                                                                                                                                                                |                                                                                                                                                                                                     |      |        |           |   |   |  |   |   |   |                                                                                                                                                                               |                                                                                                                                             |                                                                                                                                                                                                                                                                                                                                                                                             |      |      |    |    |   |   |   |   |   |   |   |   |   |   |   |   |   |   |                                                                                                                                                                                                                                                                                                                                                                                                                              |      |      |    |    |   |   |   |   |   |   |   |   |   |   |   |   |   |   |   |   |                                                                         |                                                                                                                                                                                                                                                                                                                                                            |      |      |    |    |   |   |   |   |   |   |   |   |   |   |   |   |                                                                                                                              |                                                                                                                                                                                                                                                                   |             |               |   |                                     |   |                       |                                                                                                                      |                                                            |                                                                                                                                                                                                                           |               |  |  |      |        |       |  |  |  |
| 4                                                                                                                                                                                                                                                                                                                                                                                                                                                                                                                                                                                                                                                                     | 4                                   |       |          |      |      |    |      |    |            |   |   |                  |              |            |   |      |    |     |             |              |   |   |   |            |   |   |              |   |                                                                                                                                                            |                                                                                                                                                                                |                                                                                                                                                                                                     |      |        |           |   |   |  |   |   |   |                                                                                                                                                                               |                                                                                                                                             |                                                                                                                                                                                                                                                                                                                                                                                             |      |      |    |    |   |   |   |   |   |   |   |   |   |   |   |   |   |   |                                                                                                                                                                                                                                                                                                                                                                                                                              |      |      |    |    |   |   |   |   |   |   |   |   |   |   |   |   |   |   |   |   |                                                                         |                                                                                                                                                                                                                                                                                                                                                            |      |      |    |    |   |   |   |   |   |   |   |   |   |   |   |   |                                                                                                                              |                                                                                                                                                                                                                                                                   |             |               |   |                                     |   |                       |                                                                                                                      |                                                            |                                                                                                                                                                                                                           |               |  |  |      |        |       |  |  |  |
| 8                                                                                                                                                                                                                                                                                                                                                                                                                                                                                                                                                                                                                                                                     | 8                                   |       |          |      |      |    |      |    |            |   |   |                  |              |            |   |      |    |     |             |              |   |   |   |            |   |   |              |   |                                                                                                                                                            |                                                                                                                                                                                |                                                                                                                                                                                                     |      |        |           |   |   |  |   |   |   |                                                                                                                                                                               |                                                                                                                                             |                                                                                                                                                                                                                                                                                                                                                                                             |      |      |    |    |   |   |   |   |   |   |   |   |   |   |   |   |   |   |                                                                                                                                                                                                                                                                                                                                                                                                                              |      |      |    |    |   |   |   |   |   |   |   |   |   |   |   |   |   |   |   |   |                                                                         |                                                                                                                                                                                                                                                                                                                                                            |      |      |    |    |   |   |   |   |   |   |   |   |   |   |   |   |                                                                                                                              |                                                                                                                                                                                                                                                                   |             |               |   |                                     |   |                       |                                                                                                                      |                                                            |                                                                                                                                                                                                                           |               |  |  |      |        |       |  |  |  |
| 6215 ARM SC                                                                                                                                                                                                                                                                                                                                                                                                                                                                                                                                                                                                                                                           | 6220 ARM PROG                       |       |          |      |      |    |      |    |            |   |   |                  |              |            |   |      |    |     |             |              |   |   |   |            |   |   |              |   |                                                                                                                                                            |                                                                                                                                                                                |                                                                                                                                                                                                     |      |        |           |   |   |  |   |   |   |                                                                                                                                                                               |                                                                                                                                             |                                                                                                                                                                                                                                                                                                                                                                                             |      |      |    |    |   |   |   |   |   |   |   |   |   |   |   |   |   |   |                                                                                                                                                                                                                                                                                                                                                                                                                              |      |      |    |    |   |   |   |   |   |   |   |   |   |   |   |   |   |   |   |   |                                                                         |                                                                                                                                                                                                                                                                                                                                                            |      |      |    |    |   |   |   |   |   |   |   |   |   |   |   |   |                                                                                                                              |                                                                                                                                                                                                                                                                   |             |               |   |                                     |   |                       |                                                                                                                      |                                                            |                                                                                                                                                                                                                           |               |  |  |      |        |       |  |  |  |
| 0                                                                                                                                                                                                                                                                                                                                                                                                                                                                                                                                                                                                                                                                     | Better<br>Same<br>Worse<br>CG<br>NA |       |          |      |      |    |      |    |            |   |   |                  |              |            |   |      |    |     |             |              |   |   |   |            |   |   |              |   |                                                                                                                                                            |                                                                                                                                                                                |                                                                                                                                                                                                     |      |        |           |   |   |  |   |   |   |                                                                                                                                                                               |                                                                                                                                             |                                                                                                                                                                                                                                                                                                                                                                                             |      |      |    |    |   |   |   |   |   |   |   |   |   |   |   |   |   |   |                                                                                                                                                                                                                                                                                                                                                                                                                              |      |      |    |    |   |   |   |   |   |   |   |   |   |   |   |   |   |   |   |   |                                                                         |                                                                                                                                                                                                                                                                                                                                                            |      |      |    |    |   |   |   |   |   |   |   |   |   |   |   |   |                                                                                                                              |                                                                                                                                                                                                                                                                   |             |               |   |                                     |   |                       |                                                                                                                      |                                                            |                                                                                                                                                                                                                           |               |  |  |      |        |       |  |  |  |
| 0                                                                                                                                                                                                                                                                                                                                                                                                                                                                                                                                                                                                                                                                     | 0<br>1<br>2<br>8<br>9               |       |          |      |      |    |      |    |            |   |   |                  |              |            |   |      |    |     |             |              |   |   |   |            |   |   |              |   |                                                                                                                                                            |                                                                                                                                                                                |                                                                                                                                                                                                     |      |        |           |   |   |  |   |   |   |                                                                                                                                                                               |                                                                                                                                             |                                                                                                                                                                                                                                                                                                                                                                                             |      |      |    |    |   |   |   |   |   |   |   |   |   |   |   |   |   |   |                                                                                                                                                                                                                                                                                                                                                                                                                              |      |      |    |    |   |   |   |   |   |   |   |   |   |   |   |   |   |   |   |   |                                                                         |                                                                                                                                                                                                                                                                                                                                                            |      |      |    |    |   |   |   |   |   |   |   |   |   |   |   |   |                                                                                                                              |                                                                                                                                                                                                                                                                   |             |               |   |                                     |   |                       |                                                                                                                      |                                                            |                                                                                                                                                                                                                           |               |  |  |      |        |       |  |  |  |
| 6225 ARM FLAG                                                                                                                                                                                                                                                                                                                                                                                                                                                                                                                                                                                                                                                         |                                     |       |          |      |      |    |      |    |            |   |   |                  |              |            |   |      |    |     |             |              |   |   |   |            |   |   |              |   |                                                                                                                                                            |                                                                                                                                                                                |                                                                                                                                                                                                     |      |        |           |   |   |  |   |   |   |                                                                                                                                                                               |                                                                                                                                             |                                                                                                                                                                                                                                                                                                                                                                                             |      |      |    |    |   |   |   |   |   |   |   |   |   |   |   |   |   |   |                                                                                                                                                                                                                                                                                                                                                                                                                              |      |      |    |    |   |   |   |   |   |   |   |   |   |   |   |   |   |   |   |   |                                                                         |                                                                                                                                                                                                                                                                                                                                                            |      |      |    |    |   |   |   |   |   |   |   |   |   |   |   |   |                                                                                                                              |                                                                                                                                                                                                                                                                   |             |               |   |                                     |   |                       |                                                                                                                      |                                                            |                                                                                                                                                                                                                           |               |  |  |      |        |       |  |  |  |
| 0 No                                                                                                                                                                                                                                                                                                                                                                                                                                                                                                                                                                                                                                                                  | 1 Qual                              | 2 Oth |          |      |      |    |      |    |            |   |   |                  |              |            |   |      |    |     |             |              |   |   |   |            |   |   |              |   |                                                                                                                                                            |                                                                                                                                                                                |                                                                                                                                                                                                     |      |        |           |   |   |  |   |   |   |                                                                                                                                                                               |                                                                                                                                             |                                                                                                                                                                                                                                                                                                                                                                                             |      |      |    |    |   |   |   |   |   |   |   |   |   |   |   |   |   |   |                                                                                                                                                                                                                                                                                                                                                                                                                              |      |      |    |    |   |   |   |   |   |   |   |   |   |   |   |   |   |   |   |   |                                                                         |                                                                                                                                                                                                                                                                                                                                                            |      |      |    |    |   |   |   |   |   |   |   |   |   |   |   |   |                                                                                                                              |                                                                                                                                                                                                                                                                   |             |               |   |                                     |   |                       |                                                                                                                      |                                                            |                                                                                                                                                                                                                           |               |  |  |      |        |       |  |  |  |
|                                                                                                                                                                                                                                                                                                                                                                                                                                                                                                                                                                                                                                                                       |                                     |       |          |      |      |    |      |    |            |   |   |                  |              |            |   |      |    |     |             |              |   |   |   |            |   |   |              |   |                                                                                                                                                            |                                                                                                                                                                                |                                                                                                                                                                                                     |      |        |           |   |   |  |   |   |   |                                                                                                                                                                               |                                                                                                                                             |                                                                                                                                                                                                                                                                                                                                                                                             |      |      |    |    |   |   |   |   |   |   |   |   |   |   |   |   |   |   |                                                                                                                                                                                                                                                                                                                                                                                                                              |      |      |    |    |   |   |   |   |   |   |   |   |   |   |   |   |   |   |   |   |                                                                         |                                                                                                                                                                                                                                                                                                                                                            |      |      |    |    |   |   |   |   |   |   |   |   |   |   |   |   |                                                                                                                              |                                                                                                                                                                                                                                                                   |             |               |   |                                     |   |                       |                                                                                                                      |                                                            |                                                                                                                                                                                                                           |               |  |  |      |        |       |  |  |  |
| <b>6060 F2 QUALITY</b><br>Good 1<br>Fair 2<br>Bord/Poor 3<br>CG 8<br><b>TO PROBS</b><br>CG 8<br><b>PROBS</b><br><table border="1" style="width:100%; border-collapse: collapse;"> <tr> <th>Good</th> <th>B/P</th> <th>B/P</th> <th>CG</th> </tr> <tr> <th>Fair</th> <th>Ex</th> <th>Unex</th> <th>CG</th> </tr> <tr> <td>6065 Focus</td> <td>0</td> <td>1</td> <td>2</td> <td>8</td> </tr> <tr> <td>6070 Field</td> <td>0</td> <td>--</td> <td>2</td> <td>8</td> </tr> <tr> <td>6075 Stereo</td> <td>0</td> <td>1</td> <td>2</td> <td>8</td> </tr> <tr> <td>6080 Other</td> <td>0</td> <td>1</td> <td>2</td> <td>8</td> </tr> </table>                                | Good                                | B/P   | B/P      | CG   | Fair | Ex | Unex | CG | 6065 Focus | 0 | 1 | 2                | 8            | 6070 Field | 0 | --   | 2  | 8   | 6075 Stereo | 0            | 1 | 2 | 8 | 6080 Other | 0 | 1 | 2            | 8 | <b>6160 ART-NAR</b><br>None 0<br>Quest 1<br>< Std #19 2<br>≥ Std #19 3<br>CG 8<br><b>6165 A/V-NICK</b><br>Absent 0<br>Quest 1<br>Present 2<br>CG 8<br>NA 9 | <b>AREA</b><br>N/A<br>< Std C <sub>0</sub><br>< Std C <sub>1</sub><br>< Std C <sub>2</sub><br>< Std I <sub>2</sub><br>< Std O <sub>2</sub><br>≥ Std O <sub>2</sub><br>CG<br>NA | <b>6220 ARM FLAG</b><br><table border="1" style="width:100%; border-collapse: collapse;"> <tr> <th>0 No</th> <th>1 Qual</th> <th>2 Oth</th> </tr> <tr> <td></td> <td></td> <td></td> </tr> </table> | 0 No | 1 Qual | 2 Oth     |   |   |  |   |   |   |                                                                                                                                                                               |                                                                                                                                             |                                                                                                                                                                                                                                                                                                                                                                                             |      |      |    |    |   |   |   |   |   |   |   |   |   |   |   |   |   |   |                                                                                                                                                                                                                                                                                                                                                                                                                              |      |      |    |    |   |   |   |   |   |   |   |   |   |   |   |   |   |   |   |   |                                                                         |                                                                                                                                                                                                                                                                                                                                                            |      |      |    |    |   |   |   |   |   |   |   |   |   |   |   |   |                                                                                                                              |                                                                                                                                                                                                                                                                   |             |               |   |                                     |   |                       |                                                                                                                      |                                                            |                                                                                                                                                                                                                           |               |  |  |      |        |       |  |  |  |
| Good                                                                                                                                                                                                                                                                                                                                                                                                                                                                                                                                                                                                                                                                  | B/P                                 | B/P   | CG       |      |      |    |      |    |            |   |   |                  |              |            |   |      |    |     |             |              |   |   |   |            |   |   |              |   |                                                                                                                                                            |                                                                                                                                                                                |                                                                                                                                                                                                     |      |        |           |   |   |  |   |   |   |                                                                                                                                                                               |                                                                                                                                             |                                                                                                                                                                                                                                                                                                                                                                                             |      |      |    |    |   |   |   |   |   |   |   |   |   |   |   |   |   |   |                                                                                                                                                                                                                                                                                                                                                                                                                              |      |      |    |    |   |   |   |   |   |   |   |   |   |   |   |   |   |   |   |   |                                                                         |                                                                                                                                                                                                                                                                                                                                                            |      |      |    |    |   |   |   |   |   |   |   |   |   |   |   |   |                                                                                                                              |                                                                                                                                                                                                                                                                   |             |               |   |                                     |   |                       |                                                                                                                      |                                                            |                                                                                                                                                                                                                           |               |  |  |      |        |       |  |  |  |
| Fair                                                                                                                                                                                                                                                                                                                                                                                                                                                                                                                                                                                                                                                                  | Ex                                  | Unex  | CG       |      |      |    |      |    |            |   |   |                  |              |            |   |      |    |     |             |              |   |   |   |            |   |   |              |   |                                                                                                                                                            |                                                                                                                                                                                |                                                                                                                                                                                                     |      |        |           |   |   |  |   |   |   |                                                                                                                                                                               |                                                                                                                                             |                                                                                                                                                                                                                                                                                                                                                                                             |      |      |    |    |   |   |   |   |   |   |   |   |   |   |   |   |   |   |                                                                                                                                                                                                                                                                                                                                                                                                                              |      |      |    |    |   |   |   |   |   |   |   |   |   |   |   |   |   |   |   |   |                                                                         |                                                                                                                                                                                                                                                                                                                                                            |      |      |    |    |   |   |   |   |   |   |   |   |   |   |   |   |                                                                                                                              |                                                                                                                                                                                                                                                                   |             |               |   |                                     |   |                       |                                                                                                                      |                                                            |                                                                                                                                                                                                                           |               |  |  |      |        |       |  |  |  |
| 6065 Focus                                                                                                                                                                                                                                                                                                                                                                                                                                                                                                                                                                                                                                                            | 0                                   | 1     | 2        | 8    |      |    |      |    |            |   |   |                  |              |            |   |      |    |     |             |              |   |   |   |            |   |   |              |   |                                                                                                                                                            |                                                                                                                                                                                |                                                                                                                                                                                                     |      |        |           |   |   |  |   |   |   |                                                                                                                                                                               |                                                                                                                                             |                                                                                                                                                                                                                                                                                                                                                                                             |      |      |    |    |   |   |   |   |   |   |   |   |   |   |   |   |   |   |                                                                                                                                                                                                                                                                                                                                                                                                                              |      |      |    |    |   |   |   |   |   |   |   |   |   |   |   |   |   |   |   |   |                                                                         |                                                                                                                                                                                                                                                                                                                                                            |      |      |    |    |   |   |   |   |   |   |   |   |   |   |   |   |                                                                                                                              |                                                                                                                                                                                                                                                                   |             |               |   |                                     |   |                       |                                                                                                                      |                                                            |                                                                                                                                                                                                                           |               |  |  |      |        |       |  |  |  |
| 6070 Field                                                                                                                                                                                                                                                                                                                                                                                                                                                                                                                                                                                                                                                            | 0                                   | --    | 2        | 8    |      |    |      |    |            |   |   |                  |              |            |   |      |    |     |             |              |   |   |   |            |   |   |              |   |                                                                                                                                                            |                                                                                                                                                                                |                                                                                                                                                                                                     |      |        |           |   |   |  |   |   |   |                                                                                                                                                                               |                                                                                                                                             |                                                                                                                                                                                                                                                                                                                                                                                             |      |      |    |    |   |   |   |   |   |   |   |   |   |   |   |   |   |   |                                                                                                                                                                                                                                                                                                                                                                                                                              |      |      |    |    |   |   |   |   |   |   |   |   |   |   |   |   |   |   |   |   |                                                                         |                                                                                                                                                                                                                                                                                                                                                            |      |      |    |    |   |   |   |   |   |   |   |   |   |   |   |   |                                                                                                                              |                                                                                                                                                                                                                                                                   |             |               |   |                                     |   |                       |                                                                                                                      |                                                            |                                                                                                                                                                                                                           |               |  |  |      |        |       |  |  |  |
| 6075 Stereo                                                                                                                                                                                                                                                                                                                                                                                                                                                                                                                                                                                                                                                           | 0                                   | 1     | 2        | 8    |      |    |      |    |            |   |   |                  |              |            |   |      |    |     |             |              |   |   |   |            |   |   |              |   |                                                                                                                                                            |                                                                                                                                                                                |                                                                                                                                                                                                     |      |        |           |   |   |  |   |   |   |                                                                                                                                                                               |                                                                                                                                             |                                                                                                                                                                                                                                                                                                                                                                                             |      |      |    |    |   |   |   |   |   |   |   |   |   |   |   |   |   |   |                                                                                                                                                                                                                                                                                                                                                                                                                              |      |      |    |    |   |   |   |   |   |   |   |   |   |   |   |   |   |   |   |   |                                                                         |                                                                                                                                                                                                                                                                                                                                                            |      |      |    |    |   |   |   |   |   |   |   |   |   |   |   |   |                                                                                                                              |                                                                                                                                                                                                                                                                   |             |               |   |                                     |   |                       |                                                                                                                      |                                                            |                                                                                                                                                                                                                           |               |  |  |      |        |       |  |  |  |
| 6080 Other                                                                                                                                                                                                                                                                                                                                                                                                                                                                                                                                                                                                                                                            | 0                                   | 1     | 2        | 8    |      |    |      |    |            |   |   |                  |              |            |   |      |    |     |             |              |   |   |   |            |   |   |              |   |                                                                                                                                                            |                                                                                                                                                                                |                                                                                                                                                                                                     |      |        |           |   |   |  |   |   |   |                                                                                                                                                                               |                                                                                                                                             |                                                                                                                                                                                                                                                                                                                                                                                             |      |      |    |    |   |   |   |   |   |   |   |   |   |   |   |   |   |   |                                                                                                                                                                                                                                                                                                                                                                                                                              |      |      |    |    |   |   |   |   |   |   |   |   |   |   |   |   |   |   |   |   |                                                                         |                                                                                                                                                                                                                                                                                                                                                            |      |      |    |    |   |   |   |   |   |   |   |   |   |   |   |   |                                                                                                                              |                                                                                                                                                                                                                                                                   |             |               |   |                                     |   |                       |                                                                                                                      |                                                            |                                                                                                                                                                                                                           |               |  |  |      |        |       |  |  |  |
| 0 No                                                                                                                                                                                                                                                                                                                                                                                                                                                                                                                                                                                                                                                                  | 1 Qual                              | 2 Oth |          |      |      |    |      |    |            |   |   |                  |              |            |   |      |    |     |             |              |   |   |   |            |   |   |              |   |                                                                                                                                                            |                                                                                                                                                                                |                                                                                                                                                                                                     |      |        |           |   |   |  |   |   |   |                                                                                                                                                                               |                                                                                                                                             |                                                                                                                                                                                                                                                                                                                                                                                             |      |      |    |    |   |   |   |   |   |   |   |   |   |   |   |   |   |   |                                                                                                                                                                                                                                                                                                                                                                                                                              |      |      |    |    |   |   |   |   |   |   |   |   |   |   |   |   |   |   |   |   |                                                                         |                                                                                                                                                                                                                                                                                                                                                            |      |      |    |    |   |   |   |   |   |   |   |   |   |   |   |   |                                                                                                                              |                                                                                                                                                                                                                                                                   |             |               |   |                                     |   |                       |                                                                                                                      |                                                            |                                                                                                                                                                                                                           |               |  |  |      |        |       |  |  |  |
|                                                                                                                                                                                                                                                                                                                                                                                                                                                                                                                                                                                                                                                                       |                                     |       |          |      |      |    |      |    |            |   |   |                  |              |            |   |      |    |     |             |              |   |   |   |            |   |   |              |   |                                                                                                                                                            |                                                                                                                                                                                |                                                                                                                                                                                                     |      |        |           |   |   |  |   |   |   |                                                                                                                                                                               |                                                                                                                                             |                                                                                                                                                                                                                                                                                                                                                                                             |      |      |    |    |   |   |   |   |   |   |   |   |   |   |   |   |   |   |                                                                                                                                                                                                                                                                                                                                                                                                                              |      |      |    |    |   |   |   |   |   |   |   |   |   |   |   |   |   |   |   |   |                                                                         |                                                                                                                                                                                                                                                                                                                                                            |      |      |    |    |   |   |   |   |   |   |   |   |   |   |   |   |                                                                                                                              |                                                                                                                                                                                                                                                                   |             |               |   |                                     |   |                       |                                                                                                                      |                                                            |                                                                                                                                                                                                                           |               |  |  |      |        |       |  |  |  |
| <table border="1" style="width:100%; border-collapse: collapse;"> <tr> <th colspan="4">6230 ARM EXAMPLE</th> </tr> <tr> <th>0 No</th> <th>1+</th> <th>Yes</th> <th>see list</th> </tr> <tr> <td></td> <td></td> <td></td> <td></td> </tr> </table>                                                                                                                                                                                                                                                                                                                                                                                                                    |                                     |       |          |      |      |    |      |    |            |   |   | 6230 ARM EXAMPLE |              |            |   | 0 No | 1+ | Yes | see list    |              |   |   |   |            |   |   |              |   |                                                                                                                                                            |                                                                                                                                                                                |                                                                                                                                                                                                     |      |        |           |   |   |  |   |   |   |                                                                                                                                                                               |                                                                                                                                             |                                                                                                                                                                                                                                                                                                                                                                                             |      |      |    |    |   |   |   |   |   |   |   |   |   |   |   |   |   |   |                                                                                                                                                                                                                                                                                                                                                                                                                              |      |      |    |    |   |   |   |   |   |   |   |   |   |   |   |   |   |   |   |   |                                                                         |                                                                                                                                                                                                                                                                                                                                                            |      |      |    |    |   |   |   |   |   |   |   |   |   |   |   |   |                                                                                                                              |                                                                                                                                                                                                                                                                   |             |               |   |                                     |   |                       |                                                                                                                      |                                                            |                                                                                                                                                                                                                           |               |  |  |      |        |       |  |  |  |
| 6230 ARM EXAMPLE                                                                                                                                                                                                                                                                                                                                                                                                                                                                                                                                                                                                                                                      |                                     |       |          |      |      |    |      |    |            |   |   |                  |              |            |   |      |    |     |             |              |   |   |   |            |   |   |              |   |                                                                                                                                                            |                                                                                                                                                                                |                                                                                                                                                                                                     |      |        |           |   |   |  |   |   |   |                                                                                                                                                                               |                                                                                                                                             |                                                                                                                                                                                                                                                                                                                                                                                             |      |      |    |    |   |   |   |   |   |   |   |   |   |   |   |   |   |   |                                                                                                                                                                                                                                                                                                                                                                                                                              |      |      |    |    |   |   |   |   |   |   |   |   |   |   |   |   |   |   |   |   |                                                                         |                                                                                                                                                                                                                                                                                                                                                            |      |      |    |    |   |   |   |   |   |   |   |   |   |   |   |   |                                                                                                                              |                                                                                                                                                                                                                                                                   |             |               |   |                                     |   |                       |                                                                                                                      |                                                            |                                                                                                                                                                                                                           |               |  |  |      |        |       |  |  |  |
| 0 No                                                                                                                                                                                                                                                                                                                                                                                                                                                                                                                                                                                                                                                                  | 1+                                  | Yes   | see list |      |      |    |      |    |            |   |   |                  |              |            |   |      |    |     |             |              |   |   |   |            |   |   |              |   |                                                                                                                                                            |                                                                                                                                                                                |                                                                                                                                                                                                     |      |        |           |   |   |  |   |   |   |                                                                                                                                                                               |                                                                                                                                             |                                                                                                                                                                                                                                                                                                                                                                                             |      |      |    |    |   |   |   |   |   |   |   |   |   |   |   |   |   |   |                                                                                                                                                                                                                                                                                                                                                                                                                              |      |      |    |    |   |   |   |   |   |   |   |   |   |   |   |   |   |   |   |   |                                                                         |                                                                                                                                                                                                                                                                                                                                                            |      |      |    |    |   |   |   |   |   |   |   |   |   |   |   |   |                                                                                                                              |                                                                                                                                                                                                                                                                   |             |               |   |                                     |   |                       |                                                                                                                      |                                                            |                                                                                                                                                                                                                           |               |  |  |      |        |       |  |  |  |
|                                                                                                                                                                                                                                                                                                                                                                                                                                                                                                                                                                                                                                                                       |                                     |       |          |      |      |    |      |    |            |   |   |                  |              |            |   |      |    |     |             |              |   |   |   |            |   |   |              |   |                                                                                                                                                            |                                                                                                                                                                                |                                                                                                                                                                                                     |      |        |           |   |   |  |   |   |   |                                                                                                                                                                               |                                                                                                                                             |                                                                                                                                                                                                                                                                                                                                                                                             |      |      |    |    |   |   |   |   |   |   |   |   |   |   |   |   |   |   |                                                                                                                                                                                                                                                                                                                                                                                                                              |      |      |    |    |   |   |   |   |   |   |   |   |   |   |   |   |   |   |   |   |                                                                         |                                                                                                                                                                                                                                                                                                                                                            |      |      |    |    |   |   |   |   |   |   |   |   |   |   |   |   |                                                                                                                              |                                                                                                                                                                                                                                                                   |             |               |   |                                     |   |                       |                                                                                                                      |                                                            |                                                                                                                                                                                                                           |               |  |  |      |        |       |  |  |  |

| 6240 OD Other ARM?      | No | Yes | 6290 OD Other Lesions? | No | Yes | OD Other Lesions?      | All Flds | Cent Pt |
|-------------------------|----|-----|------------------------|----|-----|------------------------|----------|---------|
|                         | 0  | 2   |                        | 0  | 2   |                        | Q        | Yes     |
|                         |    |     |                        |    |     |                        | Q        | Yes     |
| MAC DEGEN               |    |     |                        |    |     | 6340 Chorioret Scar    | 1        | 2       |
| 6241 Pseudo Temp Drusen | 1  | 2   | 6295 Peripap Atrophy   | 1  | 2   | 6345 SWR Tension Lines | 1        | 2       |
| 6245 Reticular Drusen   | 1  | 2   | 6300 Art Sheathing     | 1  | 2   | 6350 SWR Cello Reflex  | 1        | 2       |
| 6250 Calcified Drusen   | 1  | 2   | 6305 Cen Art Occlus    | 1  | 2   | 6355 Mac Hole          | -        | -       |
| 6255 ARM Rx             | 1  | 2   | 6310 Br Art Occlus     | 1  | 2   | 6360 Histoplasmosis    | 1        | 2       |
| 6260 PED/RD             | 1  | 2   | 6315 Cen Vein Occlus   | 1  | 2   | 6365 Non-Diab ME       | 1        | 2       |
| 6265 Subret Hem         | 1  | 2   | 6320 Br Vein Occlus    | 1  | 2   | 6370 Ret Detach        | 1        | 2       |
| 6270 Disciform Scar     | 1  | 2   | 6325 Hollen. Plaque*   | 1  | 2   | 6375 Focal/(ME) PC     | 1        | 2       |
| 6275 Geog Atrophy       | 1  | 2   | 6330 Ast. Hyalosis     | 1  | 2   | 6380 Scatter PC        | 1        | 2       |
| 6280 Other (comments)   | 1  | 2   | 6335 Nevus             | 1  | 2   | 6385 Thick Vit/Gual    | 1        | 2       |
|                         |    |     |                        |    |     | 6390 Other (comments)  | 1        | 2       |

| OD LENS PHOTO QUALITY                                                                                                                                                                                                                                                                                                                                                                                                                                                                                                                                                                                                                                                                                                                                                                                                                                                                                                                            | OD SLIT LAMP | OD NEITZ |          |              |    |    |   |     |              |   |   |   |   |   |            |     |     |     |     |    |  |   |   |   |   |   |    |  |     |  |     |  |    |     |   |   |   |   |              |   |   |   |   |   |   |              |   |   |   |   |   |   |                                                                                                                                                                                                                         |                                                                                                                                                                                                                                                                                                                                                                                                                                                                                                                                                                                                                                                                                                                                                                                                                                                                                                                                                                                                                                                                                                                                                                                                                      |    |    |    |    |    |             |  |  |  |  |             |  |  |  |  |             |  |  |  |  |      |      |      |      |      |      |     |      |     |           |        |   |   |   |      |      |   |   |   |       |       |   |   |   |         |    |   |   |   |              |    |   |   |   |             |
|--------------------------------------------------------------------------------------------------------------------------------------------------------------------------------------------------------------------------------------------------------------------------------------------------------------------------------------------------------------------------------------------------------------------------------------------------------------------------------------------------------------------------------------------------------------------------------------------------------------------------------------------------------------------------------------------------------------------------------------------------------------------------------------------------------------------------------------------------------------------------------------------------------------------------------------------------|--------------|----------|----------|--------------|----|----|---|-----|--------------|---|---|---|---|---|------------|-----|-----|-----|-----|----|--|---|---|---|---|---|----|--|-----|--|-----|--|----|-----|---|---|---|---|--------------|---|---|---|---|---|---|--------------|---|---|---|---|---|---|-------------------------------------------------------------------------------------------------------------------------------------------------------------------------------------------------------------------------|----------------------------------------------------------------------------------------------------------------------------------------------------------------------------------------------------------------------------------------------------------------------------------------------------------------------------------------------------------------------------------------------------------------------------------------------------------------------------------------------------------------------------------------------------------------------------------------------------------------------------------------------------------------------------------------------------------------------------------------------------------------------------------------------------------------------------------------------------------------------------------------------------------------------------------------------------------------------------------------------------------------------------------------------------------------------------------------------------------------------------------------------------------------------------------------------------------------------|----|----|----|----|----|-------------|--|--|--|--|-------------|--|--|--|--|-------------|--|--|--|--|------|------|------|------|------|------|-----|------|-----|-----------|--------|---|---|---|------|------|---|---|---|-------|-------|---|---|---|---------|----|---|---|---|--------------|----|---|---|---|-------------|
| <b>6400 LENS STATUS</b><br>No Lens 0<br>IOL 1<br>Lens Present 2<br>CG 8<br>NA - No Pix 9<br><table border="1" style="width:100%; border-collapse: collapse;"> <tr> <th colspan="2">OD</th> <th colspan="2">GRADABLE</th> </tr> <tr> <th>Ab</th> <th>Pr</th> <th>N</th> <th>G/F</th> </tr> <tr> <td>6405 Sl/Lamp</td> <td>0</td> <td>2</td> <td>0</td> <td>1</td> <td>2</td> </tr> <tr> <td>6415 Focus</td> <td>Cor</td> <td>Ant</td> <td>Nuc</td> <td>Pos</td> <td>CG</td> </tr> <tr> <td></td> <td>0</td> <td>1</td> <td>2</td> <td>3</td> <td>8</td> </tr> <tr> <th colspan="2">Ab</th> <th colspan="2">B/P</th> <th colspan="2">G/F</th> </tr> <tr> <th>Pr</th> <th>Dig</th> <th>N</th> <th>Y</th> <th>Y</th> <th>Y</th> </tr> <tr> <td>6420 Neitz/A</td> <td>0</td> <td>2</td> <td>3</td> <td>0</td> <td>1</td> <td>2</td> </tr> <tr> <td>6430 Neitz/P</td> <td>0</td> <td>2</td> <td>3</td> <td>0</td> <td>1</td> <td>2</td> </tr> </table> | OD           |          | GRADABLE |              | Ab | Pr | N | G/F | 6405 Sl/Lamp | 0 | 2 | 0 | 1 | 2 | 6415 Focus | Cor | Ant | Nuc | Pos | CG |  | 0 | 1 | 2 | 3 | 8 | Ab |  | B/P |  | G/F |  | Pr | Dig | N | Y | Y | Y | 6420 Neitz/A | 0 | 2 | 3 | 0 | 1 | 2 | 6430 Neitz/P | 0 | 2 | 3 | 0 | 1 | 2 | <b>6440 NSC</b><br>≤ STD 1 1<br>≤ STD 2 2<br>≤ STD 3 3<br>≤ STD 4 4<br>> STD 4 5<br>CG 8<br><b>6444 SL-COLOR</b><br>< STD 3 0<br>≥ STD 3 1<br>CG 8<br><b>6446 CORT-FLECKS</b><br>None 0<br>Quest 1<br>Present 2<br>CG 8 | <b>6448 Any Abnormalities Present?</b> No 0 Yes 2<br><table border="1" style="width:100%; border-collapse: collapse;"> <tr> <th>Q1</th> <th>Q2</th> <th>Q3</th> <th>Q4</th> <th>CC</th> </tr> <tr> <td>645__ CRT %</td> <td></td> <td></td> <td></td> <td></td> </tr> <tr> <td>646__ PSC %</td> <td></td> <td></td> <td></td> <td></td> </tr> <tr> <td>647__ VAC #</td> <td></td> <td></td> <td></td> <td></td> </tr> </table> <b>6480 WACO</b> NO 0 Q 1 WACO 2 TWACO+/- 3 CG 8<br><b>6482 MIT DOT</b> NO 0 Q 1 YES 2 CG 8<br><b>6484 PSEUDO-EX</b> NO 0 Q 1 YES 2 CG 8<br><table border="1" style="width:100%; border-collapse: collapse;"> <tr> <th>LENS</th> <th>6486</th> <th>6488</th> <th>6490</th> <th>6492</th> </tr> <tr> <th>PROG</th> <th>NSC</th> <th>CORT</th> <th>PSC</th> <th>LENS FLAG</th> </tr> <tr> <td>Better</td> <td>0</td> <td>0</td> <td>0</td> <td>NO 0</td> </tr> <tr> <td>Same</td> <td>1</td> <td>1</td> <td>1</td> <td>Y/Q 1</td> </tr> <tr> <td>Worse</td> <td>2</td> <td>2</td> <td>2</td> <td>Y/OTH 2</td> </tr> <tr> <td>CG</td> <td>8</td> <td>8</td> <td>8</td> <td>6495 LENS EX</td> </tr> <tr> <td>NA</td> <td>9</td> <td>9</td> <td>9</td> <td>0 No 1+ Yes</td> </tr> </table> | Q1 | Q2 | Q3 | Q4 | CC | 645__ CRT % |  |  |  |  | 646__ PSC % |  |  |  |  | 647__ VAC # |  |  |  |  | LENS | 6486 | 6488 | 6490 | 6492 | PROG | NSC | CORT | PSC | LENS FLAG | Better | 0 | 0 | 0 | NO 0 | Same | 1 | 1 | 1 | Y/Q 1 | Worse | 2 | 2 | 2 | Y/OTH 2 | CG | 8 | 8 | 8 | 6495 LENS EX | NA | 9 | 9 | 9 | 0 No 1+ Yes |
| OD                                                                                                                                                                                                                                                                                                                                                                                                                                                                                                                                                                                                                                                                                                                                                                                                                                                                                                                                               |              | GRADABLE |          |              |    |    |   |     |              |   |   |   |   |   |            |     |     |     |     |    |  |   |   |   |   |   |    |  |     |  |     |  |    |     |   |   |   |   |              |   |   |   |   |   |   |              |   |   |   |   |   |   |                                                                                                                                                                                                                         |                                                                                                                                                                                                                                                                                                                                                                                                                                                                                                                                                                                                                                                                                                                                                                                                                                                                                                                                                                                                                                                                                                                                                                                                                      |    |    |    |    |    |             |  |  |  |  |             |  |  |  |  |             |  |  |  |  |      |      |      |      |      |      |     |      |     |           |        |   |   |   |      |      |   |   |   |       |       |   |   |   |         |    |   |   |   |              |    |   |   |   |             |
| Ab                                                                                                                                                                                                                                                                                                                                                                                                                                                                                                                                                                                                                                                                                                                                                                                                                                                                                                                                               | Pr           | N        | G/F      |              |    |    |   |     |              |   |   |   |   |   |            |     |     |     |     |    |  |   |   |   |   |   |    |  |     |  |     |  |    |     |   |   |   |   |              |   |   |   |   |   |   |              |   |   |   |   |   |   |                                                                                                                                                                                                                         |                                                                                                                                                                                                                                                                                                                                                                                                                                                                                                                                                                                                                                                                                                                                                                                                                                                                                                                                                                                                                                                                                                                                                                                                                      |    |    |    |    |    |             |  |  |  |  |             |  |  |  |  |             |  |  |  |  |      |      |      |      |      |      |     |      |     |           |        |   |   |   |      |      |   |   |   |       |       |   |   |   |         |    |   |   |   |              |    |   |   |   |             |
| 6405 Sl/Lamp                                                                                                                                                                                                                                                                                                                                                                                                                                                                                                                                                                                                                                                                                                                                                                                                                                                                                                                                     | 0            | 2        | 0        | 1            | 2  |    |   |     |              |   |   |   |   |   |            |     |     |     |     |    |  |   |   |   |   |   |    |  |     |  |     |  |    |     |   |   |   |   |              |   |   |   |   |   |   |              |   |   |   |   |   |   |                                                                                                                                                                                                                         |                                                                                                                                                                                                                                                                                                                                                                                                                                                                                                                                                                                                                                                                                                                                                                                                                                                                                                                                                                                                                                                                                                                                                                                                                      |    |    |    |    |    |             |  |  |  |  |             |  |  |  |  |             |  |  |  |  |      |      |      |      |      |      |     |      |     |           |        |   |   |   |      |      |   |   |   |       |       |   |   |   |         |    |   |   |   |              |    |   |   |   |             |
| 6415 Focus                                                                                                                                                                                                                                                                                                                                                                                                                                                                                                                                                                                                                                                                                                                                                                                                                                                                                                                                       | Cor          | Ant      | Nuc      | Pos          | CG |    |   |     |              |   |   |   |   |   |            |     |     |     |     |    |  |   |   |   |   |   |    |  |     |  |     |  |    |     |   |   |   |   |              |   |   |   |   |   |   |              |   |   |   |   |   |   |                                                                                                                                                                                                                         |                                                                                                                                                                                                                                                                                                                                                                                                                                                                                                                                                                                                                                                                                                                                                                                                                                                                                                                                                                                                                                                                                                                                                                                                                      |    |    |    |    |    |             |  |  |  |  |             |  |  |  |  |             |  |  |  |  |      |      |      |      |      |      |     |      |     |           |        |   |   |   |      |      |   |   |   |       |       |   |   |   |         |    |   |   |   |              |    |   |   |   |             |
|                                                                                                                                                                                                                                                                                                                                                                                                                                                                                                                                                                                                                                                                                                                                                                                                                                                                                                                                                  | 0            | 1        | 2        | 3            | 8  |    |   |     |              |   |   |   |   |   |            |     |     |     |     |    |  |   |   |   |   |   |    |  |     |  |     |  |    |     |   |   |   |   |              |   |   |   |   |   |   |              |   |   |   |   |   |   |                                                                                                                                                                                                                         |                                                                                                                                                                                                                                                                                                                                                                                                                                                                                                                                                                                                                                                                                                                                                                                                                                                                                                                                                                                                                                                                                                                                                                                                                      |    |    |    |    |    |             |  |  |  |  |             |  |  |  |  |             |  |  |  |  |      |      |      |      |      |      |     |      |     |           |        |   |   |   |      |      |   |   |   |       |       |   |   |   |         |    |   |   |   |              |    |   |   |   |             |
| Ab                                                                                                                                                                                                                                                                                                                                                                                                                                                                                                                                                                                                                                                                                                                                                                                                                                                                                                                                               |              | B/P      |          | G/F          |    |    |   |     |              |   |   |   |   |   |            |     |     |     |     |    |  |   |   |   |   |   |    |  |     |  |     |  |    |     |   |   |   |   |              |   |   |   |   |   |   |              |   |   |   |   |   |   |                                                                                                                                                                                                                         |                                                                                                                                                                                                                                                                                                                                                                                                                                                                                                                                                                                                                                                                                                                                                                                                                                                                                                                                                                                                                                                                                                                                                                                                                      |    |    |    |    |    |             |  |  |  |  |             |  |  |  |  |             |  |  |  |  |      |      |      |      |      |      |     |      |     |           |        |   |   |   |      |      |   |   |   |       |       |   |   |   |         |    |   |   |   |              |    |   |   |   |             |
| Pr                                                                                                                                                                                                                                                                                                                                                                                                                                                                                                                                                                                                                                                                                                                                                                                                                                                                                                                                               | Dig          | N        | Y        | Y            | Y  |    |   |     |              |   |   |   |   |   |            |     |     |     |     |    |  |   |   |   |   |   |    |  |     |  |     |  |    |     |   |   |   |   |              |   |   |   |   |   |   |              |   |   |   |   |   |   |                                                                                                                                                                                                                         |                                                                                                                                                                                                                                                                                                                                                                                                                                                                                                                                                                                                                                                                                                                                                                                                                                                                                                                                                                                                                                                                                                                                                                                                                      |    |    |    |    |    |             |  |  |  |  |             |  |  |  |  |             |  |  |  |  |      |      |      |      |      |      |     |      |     |           |        |   |   |   |      |      |   |   |   |       |       |   |   |   |         |    |   |   |   |              |    |   |   |   |             |
| 6420 Neitz/A                                                                                                                                                                                                                                                                                                                                                                                                                                                                                                                                                                                                                                                                                                                                                                                                                                                                                                                                     | 0            | 2        | 3        | 0            | 1  | 2  |   |     |              |   |   |   |   |   |            |     |     |     |     |    |  |   |   |   |   |   |    |  |     |  |     |  |    |     |   |   |   |   |              |   |   |   |   |   |   |              |   |   |   |   |   |   |                                                                                                                                                                                                                         |                                                                                                                                                                                                                                                                                                                                                                                                                                                                                                                                                                                                                                                                                                                                                                                                                                                                                                                                                                                                                                                                                                                                                                                                                      |    |    |    |    |    |             |  |  |  |  |             |  |  |  |  |             |  |  |  |  |      |      |      |      |      |      |     |      |     |           |        |   |   |   |      |      |   |   |   |       |       |   |   |   |         |    |   |   |   |              |    |   |   |   |             |
| 6430 Neitz/P                                                                                                                                                                                                                                                                                                                                                                                                                                                                                                                                                                                                                                                                                                                                                                                                                                                                                                                                     | 0            | 2        | 3        | 0            | 1  | 2  |   |     |              |   |   |   |   |   |            |     |     |     |     |    |  |   |   |   |   |   |    |  |     |  |     |  |    |     |   |   |   |   |              |   |   |   |   |   |   |              |   |   |   |   |   |   |                                                                                                                                                                                                                         |                                                                                                                                                                                                                                                                                                                                                                                                                                                                                                                                                                                                                                                                                                                                                                                                                                                                                                                                                                                                                                                                                                                                                                                                                      |    |    |    |    |    |             |  |  |  |  |             |  |  |  |  |             |  |  |  |  |      |      |      |      |      |      |     |      |     |           |        |   |   |   |      |      |   |   |   |       |       |   |   |   |         |    |   |   |   |              |    |   |   |   |             |
| Q1                                                                                                                                                                                                                                                                                                                                                                                                                                                                                                                                                                                                                                                                                                                                                                                                                                                                                                                                               | Q2           | Q3       | Q4       | CC           |    |    |   |     |              |   |   |   |   |   |            |     |     |     |     |    |  |   |   |   |   |   |    |  |     |  |     |  |    |     |   |   |   |   |              |   |   |   |   |   |   |              |   |   |   |   |   |   |                                                                                                                                                                                                                         |                                                                                                                                                                                                                                                                                                                                                                                                                                                                                                                                                                                                                                                                                                                                                                                                                                                                                                                                                                                                                                                                                                                                                                                                                      |    |    |    |    |    |             |  |  |  |  |             |  |  |  |  |             |  |  |  |  |      |      |      |      |      |      |     |      |     |           |        |   |   |   |      |      |   |   |   |       |       |   |   |   |         |    |   |   |   |              |    |   |   |   |             |
| 645__ CRT %                                                                                                                                                                                                                                                                                                                                                                                                                                                                                                                                                                                                                                                                                                                                                                                                                                                                                                                                      |              |          |          |              |    |    |   |     |              |   |   |   |   |   |            |     |     |     |     |    |  |   |   |   |   |   |    |  |     |  |     |  |    |     |   |   |   |   |              |   |   |   |   |   |   |              |   |   |   |   |   |   |                                                                                                                                                                                                                         |                                                                                                                                                                                                                                                                                                                                                                                                                                                                                                                                                                                                                                                                                                                                                                                                                                                                                                                                                                                                                                                                                                                                                                                                                      |    |    |    |    |    |             |  |  |  |  |             |  |  |  |  |             |  |  |  |  |      |      |      |      |      |      |     |      |     |           |        |   |   |   |      |      |   |   |   |       |       |   |   |   |         |    |   |   |   |              |    |   |   |   |             |
| 646__ PSC %                                                                                                                                                                                                                                                                                                                                                                                                                                                                                                                                                                                                                                                                                                                                                                                                                                                                                                                                      |              |          |          |              |    |    |   |     |              |   |   |   |   |   |            |     |     |     |     |    |  |   |   |   |   |   |    |  |     |  |     |  |    |     |   |   |   |   |              |   |   |   |   |   |   |              |   |   |   |   |   |   |                                                                                                                                                                                                                         |                                                                                                                                                                                                                                                                                                                                                                                                                                                                                                                                                                                                                                                                                                                                                                                                                                                                                                                                                                                                                                                                                                                                                                                                                      |    |    |    |    |    |             |  |  |  |  |             |  |  |  |  |             |  |  |  |  |      |      |      |      |      |      |     |      |     |           |        |   |   |   |      |      |   |   |   |       |       |   |   |   |         |    |   |   |   |              |    |   |   |   |             |
| 647__ VAC #                                                                                                                                                                                                                                                                                                                                                                                                                                                                                                                                                                                                                                                                                                                                                                                                                                                                                                                                      |              |          |          |              |    |    |   |     |              |   |   |   |   |   |            |     |     |     |     |    |  |   |   |   |   |   |    |  |     |  |     |  |    |     |   |   |   |   |              |   |   |   |   |   |   |              |   |   |   |   |   |   |                                                                                                                                                                                                                         |                                                                                                                                                                                                                                                                                                                                                                                                                                                                                                                                                                                                                                                                                                                                                                                                                                                                                                                                                                                                                                                                                                                                                                                                                      |    |    |    |    |    |             |  |  |  |  |             |  |  |  |  |             |  |  |  |  |      |      |      |      |      |      |     |      |     |           |        |   |   |   |      |      |   |   |   |       |       |   |   |   |         |    |   |   |   |              |    |   |   |   |             |
| LENS                                                                                                                                                                                                                                                                                                                                                                                                                                                                                                                                                                                                                                                                                                                                                                                                                                                                                                                                             | 6486         | 6488     | 6490     | 6492         |    |    |   |     |              |   |   |   |   |   |            |     |     |     |     |    |  |   |   |   |   |   |    |  |     |  |     |  |    |     |   |   |   |   |              |   |   |   |   |   |   |              |   |   |   |   |   |   |                                                                                                                                                                                                                         |                                                                                                                                                                                                                                                                                                                                                                                                                                                                                                                                                                                                                                                                                                                                                                                                                                                                                                                                                                                                                                                                                                                                                                                                                      |    |    |    |    |    |             |  |  |  |  |             |  |  |  |  |             |  |  |  |  |      |      |      |      |      |      |     |      |     |           |        |   |   |   |      |      |   |   |   |       |       |   |   |   |         |    |   |   |   |              |    |   |   |   |             |
| PROG                                                                                                                                                                                                                                                                                                                                                                                                                                                                                                                                                                                                                                                                                                                                                                                                                                                                                                                                             | NSC          | CORT     | PSC      | LENS FLAG    |    |    |   |     |              |   |   |   |   |   |            |     |     |     |     |    |  |   |   |   |   |   |    |  |     |  |     |  |    |     |   |   |   |   |              |   |   |   |   |   |   |              |   |   |   |   |   |   |                                                                                                                                                                                                                         |                                                                                                                                                                                                                                                                                                                                                                                                                                                                                                                                                                                                                                                                                                                                                                                                                                                                                                                                                                                                                                                                                                                                                                                                                      |    |    |    |    |    |             |  |  |  |  |             |  |  |  |  |             |  |  |  |  |      |      |      |      |      |      |     |      |     |           |        |   |   |   |      |      |   |   |   |       |       |   |   |   |         |    |   |   |   |              |    |   |   |   |             |
| Better                                                                                                                                                                                                                                                                                                                                                                                                                                                                                                                                                                                                                                                                                                                                                                                                                                                                                                                                           | 0            | 0        | 0        | NO 0         |    |    |   |     |              |   |   |   |   |   |            |     |     |     |     |    |  |   |   |   |   |   |    |  |     |  |     |  |    |     |   |   |   |   |              |   |   |   |   |   |   |              |   |   |   |   |   |   |                                                                                                                                                                                                                         |                                                                                                                                                                                                                                                                                                                                                                                                                                                                                                                                                                                                                                                                                                                                                                                                                                                                                                                                                                                                                                                                                                                                                                                                                      |    |    |    |    |    |             |  |  |  |  |             |  |  |  |  |             |  |  |  |  |      |      |      |      |      |      |     |      |     |           |        |   |   |   |      |      |   |   |   |       |       |   |   |   |         |    |   |   |   |              |    |   |   |   |             |
| Same                                                                                                                                                                                                                                                                                                                                                                                                                                                                                                                                                                                                                                                                                                                                                                                                                                                                                                                                             | 1            | 1        | 1        | Y/Q 1        |    |    |   |     |              |   |   |   |   |   |            |     |     |     |     |    |  |   |   |   |   |   |    |  |     |  |     |  |    |     |   |   |   |   |              |   |   |   |   |   |   |              |   |   |   |   |   |   |                                                                                                                                                                                                                         |                                                                                                                                                                                                                                                                                                                                                                                                                                                                                                                                                                                                                                                                                                                                                                                                                                                                                                                                                                                                                                                                                                                                                                                                                      |    |    |    |    |    |             |  |  |  |  |             |  |  |  |  |             |  |  |  |  |      |      |      |      |      |      |     |      |     |           |        |   |   |   |      |      |   |   |   |       |       |   |   |   |         |    |   |   |   |              |    |   |   |   |             |
| Worse                                                                                                                                                                                                                                                                                                                                                                                                                                                                                                                                                                                                                                                                                                                                                                                                                                                                                                                                            | 2            | 2        | 2        | Y/OTH 2      |    |    |   |     |              |   |   |   |   |   |            |     |     |     |     |    |  |   |   |   |   |   |    |  |     |  |     |  |    |     |   |   |   |   |              |   |   |   |   |   |   |              |   |   |   |   |   |   |                                                                                                                                                                                                                         |                                                                                                                                                                                                                                                                                                                                                                                                                                                                                                                                                                                                                                                                                                                                                                                                                                                                                                                                                                                                                                                                                                                                                                                                                      |    |    |    |    |    |             |  |  |  |  |             |  |  |  |  |             |  |  |  |  |      |      |      |      |      |      |     |      |     |           |        |   |   |   |      |      |   |   |   |       |       |   |   |   |         |    |   |   |   |              |    |   |   |   |             |
| CG                                                                                                                                                                                                                                                                                                                                                                                                                                                                                                                                                                                                                                                                                                                                                                                                                                                                                                                                               | 8            | 8        | 8        | 6495 LENS EX |    |    |   |     |              |   |   |   |   |   |            |     |     |     |     |    |  |   |   |   |   |   |    |  |     |  |     |  |    |     |   |   |   |   |              |   |   |   |   |   |   |              |   |   |   |   |   |   |                                                                                                                                                                                                                         |                                                                                                                                                                                                                                                                                                                                                                                                                                                                                                                                                                                                                                                                                                                                                                                                                                                                                                                                                                                                                                                                                                                                                                                                                      |    |    |    |    |    |             |  |  |  |  |             |  |  |  |  |             |  |  |  |  |      |      |      |      |      |      |     |      |     |           |        |   |   |   |      |      |   |   |   |       |       |   |   |   |         |    |   |   |   |              |    |   |   |   |             |
| NA                                                                                                                                                                                                                                                                                                                                                                                                                                                                                                                                                                                                                                                                                                                                                                                                                                                                                                                                               | 9            | 9        | 9        | 0 No 1+ Yes  |    |    |   |     |              |   |   |   |   |   |            |     |     |     |     |    |  |   |   |   |   |   |    |  |     |  |     |  |    |     |   |   |   |   |              |   |   |   |   |   |   |              |   |   |   |   |   |   |                                                                                                                                                                                                                         |                                                                                                                                                                                                                                                                                                                                                                                                                                                                                                                                                                                                                                                                                                                                                                                                                                                                                                                                                                                                                                                                                                                                                                                                                      |    |    |    |    |    |             |  |  |  |  |             |  |  |  |  |             |  |  |  |  |      |      |      |      |      |      |     |      |     |           |        |   |   |   |      |      |   |   |   |       |       |   |   |   |         |    |   |   |   |              |    |   |   |   |             |
| 6                                                                                                                                                                                                                                                                                                                                                                                                                                                                                                                                                                                                                                                                                                                                                                                                                                                                                                                                                |              |          |          |              |    |    |   |     |              |   |   |   |   |   |            |     |     |     |     |    |  |   |   |   |   |   |    |  |     |  |     |  |    |     |   |   |   |   |              |   |   |   |   |   |   |              |   |   |   |   |   |   |                                                                                                                                                                                                                         |                                                                                                                                                                                                                                                                                                                                                                                                                                                                                                                                                                                                                                                                                                                                                                                                                                                                                                                                                                                                                                                                                                                                                                                                                      |    |    |    |    |    |             |  |  |  |  |             |  |  |  |  |             |  |  |  |  |      |      |      |      |      |      |     |      |     |           |        |   |   |   |      |      |   |   |   |       |       |   |   |   |         |    |   |   |   |              |    |   |   |   |             |

| OS - FUNDUS PHOTO                                                                                                                                                                                                                                                                                                                                                                                                                                                                                                                                                                                                                                                                                                                                                                                                                                                                                                                                                                                                                                                                                           |               |       |                                                                                |          |                                                                                                                                   |                                                                                                                                                                                                                                                                                                                                                                                                                                                                                                                                                                                                                                                                                                                                                                                                                                                                                                                                                                                                                                                                                                                                                                                                                                                      |                                                                                                                                                                                                                                                                                                                                                                                                                              |      |                                                                                         |      |     |                         |          |   |         |              |                       |     |   |     |                     |                       |              |     |     |                        |             |     |                                                                                                                                  |              |                                                                    |             |   |                                                                                                                                                                                  |   |               |                 |   |      |        |                     |                     |   |                                |    |                  |                                                                                                                                       |   |                                                                                                                                                                                                                                                                                                                                                                                             |   |                 |                       |    |    |   |                    |                                                                                                                                                                                                                                                                                                                                                    |              |    |                                                                                                                                                                                                                                                                                                                                                                                                                         |                 |   |   |    |                                                                                                                                                                                                                                                |                     |   |                                                                                                                                                                                                                                                                                                                                                                                                                                                                                                                                                                                                                                                                      |                                                                         |   |                                                                                                                                                                                                                                                                                                                                                            |   |      |      |    |    |    |    |    |             |   |   |   |   |   |             |   |   |                                                                                                                              |  |  |                                                                                                                                                                                                                                                                                                                                                                                                                          |  |             |               |  |  |  |  |  |  |  |  |  |  |  |  |  |  |  |  |  |  |
|-------------------------------------------------------------------------------------------------------------------------------------------------------------------------------------------------------------------------------------------------------------------------------------------------------------------------------------------------------------------------------------------------------------------------------------------------------------------------------------------------------------------------------------------------------------------------------------------------------------------------------------------------------------------------------------------------------------------------------------------------------------------------------------------------------------------------------------------------------------------------------------------------------------------------------------------------------------------------------------------------------------------------------------------------------------------------------------------------------------|---------------|-------|--------------------------------------------------------------------------------|----------|-----------------------------------------------------------------------------------------------------------------------------------|------------------------------------------------------------------------------------------------------------------------------------------------------------------------------------------------------------------------------------------------------------------------------------------------------------------------------------------------------------------------------------------------------------------------------------------------------------------------------------------------------------------------------------------------------------------------------------------------------------------------------------------------------------------------------------------------------------------------------------------------------------------------------------------------------------------------------------------------------------------------------------------------------------------------------------------------------------------------------------------------------------------------------------------------------------------------------------------------------------------------------------------------------------------------------------------------------------------------------------------------------|------------------------------------------------------------------------------------------------------------------------------------------------------------------------------------------------------------------------------------------------------------------------------------------------------------------------------------------------------------------------------------------------------------------------------|------|-----------------------------------------------------------------------------------------|------|-----|-------------------------|----------|---|---------|--------------|-----------------------|-----|---|-----|---------------------|-----------------------|--------------|-----|-----|------------------------|-------------|-----|----------------------------------------------------------------------------------------------------------------------------------|--------------|--------------------------------------------------------------------|-------------|---|----------------------------------------------------------------------------------------------------------------------------------------------------------------------------------|---|---------------|-----------------|---|------|--------|---------------------|---------------------|---|--------------------------------|----|------------------|---------------------------------------------------------------------------------------------------------------------------------------|---|---------------------------------------------------------------------------------------------------------------------------------------------------------------------------------------------------------------------------------------------------------------------------------------------------------------------------------------------------------------------------------------------|---|-----------------|-----------------------|----|----|---|--------------------|----------------------------------------------------------------------------------------------------------------------------------------------------------------------------------------------------------------------------------------------------------------------------------------------------------------------------------------------------|--------------|----|-------------------------------------------------------------------------------------------------------------------------------------------------------------------------------------------------------------------------------------------------------------------------------------------------------------------------------------------------------------------------------------------------------------------------|-----------------|---|---|----|------------------------------------------------------------------------------------------------------------------------------------------------------------------------------------------------------------------------------------------------|---------------------|---|----------------------------------------------------------------------------------------------------------------------------------------------------------------------------------------------------------------------------------------------------------------------------------------------------------------------------------------------------------------------------------------------------------------------------------------------------------------------------------------------------------------------------------------------------------------------------------------------------------------------------------------------------------------------|-------------------------------------------------------------------------|---|------------------------------------------------------------------------------------------------------------------------------------------------------------------------------------------------------------------------------------------------------------------------------------------------------------------------------------------------------------|---|------|------|----|----|----|----|----|-------------|---|---|---|---|---|-------------|---|---|------------------------------------------------------------------------------------------------------------------------------|--|--|--------------------------------------------------------------------------------------------------------------------------------------------------------------------------------------------------------------------------------------------------------------------------------------------------------------------------------------------------------------------------------------------------------------------------|--|-------------|---------------|--|--|--|--|--|--|--|--|--|--|--|--|--|--|--|--|--|--|
| <b>OS</b><br>ZEISS PHOTO QUALITY<br><table border="1" style="width:100%; border-collapse: collapse;"> <thead> <tr> <th rowspan="2"></th> <th colspan="3">OS</th> <th colspan="3">GRAD</th> </tr> <tr> <th>Ab</th> <th>Pr</th> <th>Dig</th> <th>N</th> <th>Y</th> <th>G/F</th> </tr> </thead> <tbody> <tr> <td>6520 Field 1</td> <td>0</td> <td>2</td> <td>3</td> <td>0</td> <td>1</td> <td>2</td> </tr> <tr> <td>6530 Field 2</td> <td>0</td> <td>2</td> <td>3</td> <td>0</td> <td>1</td> <td>2</td> </tr> <tr> <td>6540 Field 3</td> <td>0</td> <td>2</td> <td></td> <td>0</td> <td>1</td> <td>2</td> </tr> <tr> <td>6550 Iris</td> <td>0</td> <td>2</td> <td></td> <td>0</td> <td>1</td> <td>2</td> </tr> </tbody> </table>                                                                                                                                                                                                                                                                                                                                                                               |               |       |                                                                                | OS       |                                                                                                                                   |                                                                                                                                                                                                                                                                                                                                                                                                                                                                                                                                                                                                                                                                                                                                                                                                                                                                                                                                                                                                                                                                                                                                                                                                                                                      | GRAD                                                                                                                                                                                                                                                                                                                                                                                                                         |      |                                                                                         | Ab   | Pr  | Dig                     | N        | Y | G/F     | 6520 Field 1 | 0                     | 2   | 3 | 0   | 1                   | 2                     | 6530 Field 2 | 0   | 2   | 3                      | 0           | 1   | 2                                                                                                                                | 6540 Field 3 | 0                                                                  | 2           |   | 0                                                                                                                                                                                | 1 | 2             | 6550 Iris       | 0 | 2    |        | 0                   | 1                   | 2 | <b>6585 C/D</b> 0.<br>(CG = ~) |    |                  | <b>DRU-SIZE</b><br>None<br>Quest/Stip<br>< Std C <sub>0</sub><br>< Std C <sub>1</sub><br>< Std C <sub>2</sub><br>≥ Std C <sub>2</sub> |   | <table border="1" style="width:100%; border-collapse: collapse;"> <tr> <th>6670</th> <th>6680</th> </tr> <tr> <th>F2</th> <th>OG</th> </tr> <tr> <td>0</td> <td>0</td> </tr> <tr> <td>1</td> <td>1</td> </tr> <tr> <td>2</td> <td>2</td> </tr> <tr> <td>3</td> <td>3</td> </tr> <tr> <td>4</td> <td>4</td> </tr> <tr> <td>5</td> <td>5</td> </tr> <tr> <td>8</td> <td>8</td> </tr> </table> |   | 6670            | 6680                  | F2 | OG | 0 | 0                  | 1                                                                                                                                                                                                                                                                                                                                                  | 1            | 2  | 2                                                                                                                                                                                                                                                                                                                                                                                                                       | 3               | 3 | 4 | 4  | 5                                                                                                                                                                                                                                              | 5                   | 8 | 8                                                                                                                                                                                                                                                                                                                                                                                                                                                                                                                                                                                                                                                                    | <b>SOFT</b><br>Absent<br>Quest<br>Dist only<br>Indis only<br>Both<br>CG |   | <table border="1" style="width:100%; border-collapse: collapse;"> <tr> <th>6690</th> <th>6695</th> </tr> <tr> <th>F2</th> <th>OG</th> </tr> <tr> <td>0</td> <td>0</td> </tr> <tr> <td>1</td> <td>1</td> </tr> <tr> <td>2</td> <td>2</td> </tr> <tr> <td>3</td> <td>3</td> </tr> <tr> <td>4</td> <td>4</td> </tr> <tr> <td>8</td> <td>8</td> </tr> </table> |   | 6690 | 6695 | F2 | OG | 0  | 0  | 1  | 1           | 2 | 2 | 3 | 3 | 4 | 4           | 8 | 8 | <b>6710 HYP-PIG</b><br>Absent<br>Quest<br>< C <sub>0</sub><br>< C <sub>1</sub><br>< C <sub>2</sub><br>≥ C <sub>2</sub><br>CG |  |  | <table border="1" style="width:100%; border-collapse: collapse;"> <tr> <th>6715 ARM SC</th> <th>6720 ARM PROG</th> </tr> <tr> <td></td> <td></td> </tr> </table> |  | 6715 ARM SC | 6720 ARM PROG |  |  |  |  |  |  |  |  |  |  |  |  |  |  |  |  |  |  |
|                                                                                                                                                                                                                                                                                                                                                                                                                                                                                                                                                                                                                                                                                                                                                                                                                                                                                                                                                                                                                                                                                                             |               |       |                                                                                |          | OS                                                                                                                                |                                                                                                                                                                                                                                                                                                                                                                                                                                                                                                                                                                                                                                                                                                                                                                                                                                                                                                                                                                                                                                                                                                                                                                                                                                                      |                                                                                                                                                                                                                                                                                                                                                                                                                              | GRAD |                                                                                         |      |     |                         |          |   |         |              |                       |     |   |     |                     |                       |              |     |     |                        |             |     |                                                                                                                                  |              |                                                                    |             |   |                                                                                                                                                                                  |   |               |                 |   |      |        |                     |                     |   |                                |    |                  |                                                                                                                                       |   |                                                                                                                                                                                                                                                                                                                                                                                             |   |                 |                       |    |    |   |                    |                                                                                                                                                                                                                                                                                                                                                    |              |    |                                                                                                                                                                                                                                                                                                                                                                                                                         |                 |   |   |    |                                                                                                                                                                                                                                                |                     |   |                                                                                                                                                                                                                                                                                                                                                                                                                                                                                                                                                                                                                                                                      |                                                                         |   |                                                                                                                                                                                                                                                                                                                                                            |   |      |      |    |    |    |    |    |             |   |   |   |   |   |             |   |   |                                                                                                                              |  |  |                                                                                                                                                                                                                                                                                                                                                                                                                          |  |             |               |  |  |  |  |  |  |  |  |  |  |  |  |  |  |  |  |  |  |
| Ab                                                                                                                                                                                                                                                                                                                                                                                                                                                                                                                                                                                                                                                                                                                                                                                                                                                                                                                                                                                                                                                                                                          | Pr            | Dig   | N                                                                              |          | Y                                                                                                                                 | G/F                                                                                                                                                                                                                                                                                                                                                                                                                                                                                                                                                                                                                                                                                                                                                                                                                                                                                                                                                                                                                                                                                                                                                                                                                                                  |                                                                                                                                                                                                                                                                                                                                                                                                                              |      |                                                                                         |      |     |                         |          |   |         |              |                       |     |   |     |                     |                       |              |     |     |                        |             |     |                                                                                                                                  |              |                                                                    |             |   |                                                                                                                                                                                  |   |               |                 |   |      |        |                     |                     |   |                                |    |                  |                                                                                                                                       |   |                                                                                                                                                                                                                                                                                                                                                                                             |   |                 |                       |    |    |   |                    |                                                                                                                                                                                                                                                                                                                                                    |              |    |                                                                                                                                                                                                                                                                                                                                                                                                                         |                 |   |   |    |                                                                                                                                                                                                                                                |                     |   |                                                                                                                                                                                                                                                                                                                                                                                                                                                                                                                                                                                                                                                                      |                                                                         |   |                                                                                                                                                                                                                                                                                                                                                            |   |      |      |    |    |    |    |    |             |   |   |   |   |   |             |   |   |                                                                                                                              |  |  |                                                                                                                                                                                                                                                                                                                                                                                                                          |  |             |               |  |  |  |  |  |  |  |  |  |  |  |  |  |  |  |  |  |  |
| 6520 Field 1                                                                                                                                                                                                                                                                                                                                                                                                                                                                                                                                                                                                                                                                                                                                                                                                                                                                                                                                                                                                                                                                                                | 0             | 2     | 3                                                                              | 0        | 1                                                                                                                                 | 2                                                                                                                                                                                                                                                                                                                                                                                                                                                                                                                                                                                                                                                                                                                                                                                                                                                                                                                                                                                                                                                                                                                                                                                                                                                    |                                                                                                                                                                                                                                                                                                                                                                                                                              |      |                                                                                         |      |     |                         |          |   |         |              |                       |     |   |     |                     |                       |              |     |     |                        |             |     |                                                                                                                                  |              |                                                                    |             |   |                                                                                                                                                                                  |   |               |                 |   |      |        |                     |                     |   |                                |    |                  |                                                                                                                                       |   |                                                                                                                                                                                                                                                                                                                                                                                             |   |                 |                       |    |    |   |                    |                                                                                                                                                                                                                                                                                                                                                    |              |    |                                                                                                                                                                                                                                                                                                                                                                                                                         |                 |   |   |    |                                                                                                                                                                                                                                                |                     |   |                                                                                                                                                                                                                                                                                                                                                                                                                                                                                                                                                                                                                                                                      |                                                                         |   |                                                                                                                                                                                                                                                                                                                                                            |   |      |      |    |    |    |    |    |             |   |   |   |   |   |             |   |   |                                                                                                                              |  |  |                                                                                                                                                                                                                                                                                                                                                                                                                          |  |             |               |  |  |  |  |  |  |  |  |  |  |  |  |  |  |  |  |  |  |
| 6530 Field 2                                                                                                                                                                                                                                                                                                                                                                                                                                                                                                                                                                                                                                                                                                                                                                                                                                                                                                                                                                                                                                                                                                | 0             | 2     | 3                                                                              | 0        | 1                                                                                                                                 | 2                                                                                                                                                                                                                                                                                                                                                                                                                                                                                                                                                                                                                                                                                                                                                                                                                                                                                                                                                                                                                                                                                                                                                                                                                                                    |                                                                                                                                                                                                                                                                                                                                                                                                                              |      |                                                                                         |      |     |                         |          |   |         |              |                       |     |   |     |                     |                       |              |     |     |                        |             |     |                                                                                                                                  |              |                                                                    |             |   |                                                                                                                                                                                  |   |               |                 |   |      |        |                     |                     |   |                                |    |                  |                                                                                                                                       |   |                                                                                                                                                                                                                                                                                                                                                                                             |   |                 |                       |    |    |   |                    |                                                                                                                                                                                                                                                                                                                                                    |              |    |                                                                                                                                                                                                                                                                                                                                                                                                                         |                 |   |   |    |                                                                                                                                                                                                                                                |                     |   |                                                                                                                                                                                                                                                                                                                                                                                                                                                                                                                                                                                                                                                                      |                                                                         |   |                                                                                                                                                                                                                                                                                                                                                            |   |      |      |    |    |    |    |    |             |   |   |   |   |   |             |   |   |                                                                                                                              |  |  |                                                                                                                                                                                                                                                                                                                                                                                                                          |  |             |               |  |  |  |  |  |  |  |  |  |  |  |  |  |  |  |  |  |  |
| 6540 Field 3                                                                                                                                                                                                                                                                                                                                                                                                                                                                                                                                                                                                                                                                                                                                                                                                                                                                                                                                                                                                                                                                                                | 0             | 2     |                                                                                | 0        | 1                                                                                                                                 | 2                                                                                                                                                                                                                                                                                                                                                                                                                                                                                                                                                                                                                                                                                                                                                                                                                                                                                                                                                                                                                                                                                                                                                                                                                                                    |                                                                                                                                                                                                                                                                                                                                                                                                                              |      |                                                                                         |      |     |                         |          |   |         |              |                       |     |   |     |                     |                       |              |     |     |                        |             |     |                                                                                                                                  |              |                                                                    |             |   |                                                                                                                                                                                  |   |               |                 |   |      |        |                     |                     |   |                                |    |                  |                                                                                                                                       |   |                                                                                                                                                                                                                                                                                                                                                                                             |   |                 |                       |    |    |   |                    |                                                                                                                                                                                                                                                                                                                                                    |              |    |                                                                                                                                                                                                                                                                                                                                                                                                                         |                 |   |   |    |                                                                                                                                                                                                                                                |                     |   |                                                                                                                                                                                                                                                                                                                                                                                                                                                                                                                                                                                                                                                                      |                                                                         |   |                                                                                                                                                                                                                                                                                                                                                            |   |      |      |    |    |    |    |    |             |   |   |   |   |   |             |   |   |                                                                                                                              |  |  |                                                                                                                                                                                                                                                                                                                                                                                                                          |  |             |               |  |  |  |  |  |  |  |  |  |  |  |  |  |  |  |  |  |  |
| 6550 Iris                                                                                                                                                                                                                                                                                                                                                                                                                                                                                                                                                                                                                                                                                                                                                                                                                                                                                                                                                                                                                                                                                                   | 0             | 2     |                                                                                | 0        | 1                                                                                                                                 | 2                                                                                                                                                                                                                                                                                                                                                                                                                                                                                                                                                                                                                                                                                                                                                                                                                                                                                                                                                                                                                                                                                                                                                                                                                                                    |                                                                                                                                                                                                                                                                                                                                                                                                                              |      |                                                                                         |      |     |                         |          |   |         |              |                       |     |   |     |                     |                       |              |     |     |                        |             |     |                                                                                                                                  |              |                                                                    |             |   |                                                                                                                                                                                  |   |               |                 |   |      |        |                     |                     |   |                                |    |                  |                                                                                                                                       |   |                                                                                                                                                                                                                                                                                                                                                                                             |   |                 |                       |    |    |   |                    |                                                                                                                                                                                                                                                                                                                                                    |              |    |                                                                                                                                                                                                                                                                                                                                                                                                                         |                 |   |   |    |                                                                                                                                                                                                                                                |                     |   |                                                                                                                                                                                                                                                                                                                                                                                                                                                                                                                                                                                                                                                                      |                                                                         |   |                                                                                                                                                                                                                                                                                                                                                            |   |      |      |    |    |    |    |    |             |   |   |   |   |   |             |   |   |                                                                                                                              |  |  |                                                                                                                                                                                                                                                                                                                                                                                                                          |  |             |               |  |  |  |  |  |  |  |  |  |  |  |  |  |  |  |  |  |  |
| 6670                                                                                                                                                                                                                                                                                                                                                                                                                                                                                                                                                                                                                                                                                                                                                                                                                                                                                                                                                                                                                                                                                                        | 6680          |       |                                                                                |          |                                                                                                                                   |                                                                                                                                                                                                                                                                                                                                                                                                                                                                                                                                                                                                                                                                                                                                                                                                                                                                                                                                                                                                                                                                                                                                                                                                                                                      |                                                                                                                                                                                                                                                                                                                                                                                                                              |      |                                                                                         |      |     |                         |          |   |         |              |                       |     |   |     |                     |                       |              |     |     |                        |             |     |                                                                                                                                  |              |                                                                    |             |   |                                                                                                                                                                                  |   |               |                 |   |      |        |                     |                     |   |                                |    |                  |                                                                                                                                       |   |                                                                                                                                                                                                                                                                                                                                                                                             |   |                 |                       |    |    |   |                    |                                                                                                                                                                                                                                                                                                                                                    |              |    |                                                                                                                                                                                                                                                                                                                                                                                                                         |                 |   |   |    |                                                                                                                                                                                                                                                |                     |   |                                                                                                                                                                                                                                                                                                                                                                                                                                                                                                                                                                                                                                                                      |                                                                         |   |                                                                                                                                                                                                                                                                                                                                                            |   |      |      |    |    |    |    |    |             |   |   |   |   |   |             |   |   |                                                                                                                              |  |  |                                                                                                                                                                                                                                                                                                                                                                                                                          |  |             |               |  |  |  |  |  |  |  |  |  |  |  |  |  |  |  |  |  |  |
| F2                                                                                                                                                                                                                                                                                                                                                                                                                                                                                                                                                                                                                                                                                                                                                                                                                                                                                                                                                                                                                                                                                                          | OG            |       |                                                                                |          |                                                                                                                                   |                                                                                                                                                                                                                                                                                                                                                                                                                                                                                                                                                                                                                                                                                                                                                                                                                                                                                                                                                                                                                                                                                                                                                                                                                                                      |                                                                                                                                                                                                                                                                                                                                                                                                                              |      |                                                                                         |      |     |                         |          |   |         |              |                       |     |   |     |                     |                       |              |     |     |                        |             |     |                                                                                                                                  |              |                                                                    |             |   |                                                                                                                                                                                  |   |               |                 |   |      |        |                     |                     |   |                                |    |                  |                                                                                                                                       |   |                                                                                                                                                                                                                                                                                                                                                                                             |   |                 |                       |    |    |   |                    |                                                                                                                                                                                                                                                                                                                                                    |              |    |                                                                                                                                                                                                                                                                                                                                                                                                                         |                 |   |   |    |                                                                                                                                                                                                                                                |                     |   |                                                                                                                                                                                                                                                                                                                                                                                                                                                                                                                                                                                                                                                                      |                                                                         |   |                                                                                                                                                                                                                                                                                                                                                            |   |      |      |    |    |    |    |    |             |   |   |   |   |   |             |   |   |                                                                                                                              |  |  |                                                                                                                                                                                                                                                                                                                                                                                                                          |  |             |               |  |  |  |  |  |  |  |  |  |  |  |  |  |  |  |  |  |  |
| 0                                                                                                                                                                                                                                                                                                                                                                                                                                                                                                                                                                                                                                                                                                                                                                                                                                                                                                                                                                                                                                                                                                           | 0             |       |                                                                                |          |                                                                                                                                   |                                                                                                                                                                                                                                                                                                                                                                                                                                                                                                                                                                                                                                                                                                                                                                                                                                                                                                                                                                                                                                                                                                                                                                                                                                                      |                                                                                                                                                                                                                                                                                                                                                                                                                              |      |                                                                                         |      |     |                         |          |   |         |              |                       |     |   |     |                     |                       |              |     |     |                        |             |     |                                                                                                                                  |              |                                                                    |             |   |                                                                                                                                                                                  |   |               |                 |   |      |        |                     |                     |   |                                |    |                  |                                                                                                                                       |   |                                                                                                                                                                                                                                                                                                                                                                                             |   |                 |                       |    |    |   |                    |                                                                                                                                                                                                                                                                                                                                                    |              |    |                                                                                                                                                                                                                                                                                                                                                                                                                         |                 |   |   |    |                                                                                                                                                                                                                                                |                     |   |                                                                                                                                                                                                                                                                                                                                                                                                                                                                                                                                                                                                                                                                      |                                                                         |   |                                                                                                                                                                                                                                                                                                                                                            |   |      |      |    |    |    |    |    |             |   |   |   |   |   |             |   |   |                                                                                                                              |  |  |                                                                                                                                                                                                                                                                                                                                                                                                                          |  |             |               |  |  |  |  |  |  |  |  |  |  |  |  |  |  |  |  |  |  |
| 1                                                                                                                                                                                                                                                                                                                                                                                                                                                                                                                                                                                                                                                                                                                                                                                                                                                                                                                                                                                                                                                                                                           | 1             |       |                                                                                |          |                                                                                                                                   |                                                                                                                                                                                                                                                                                                                                                                                                                                                                                                                                                                                                                                                                                                                                                                                                                                                                                                                                                                                                                                                                                                                                                                                                                                                      |                                                                                                                                                                                                                                                                                                                                                                                                                              |      |                                                                                         |      |     |                         |          |   |         |              |                       |     |   |     |                     |                       |              |     |     |                        |             |     |                                                                                                                                  |              |                                                                    |             |   |                                                                                                                                                                                  |   |               |                 |   |      |        |                     |                     |   |                                |    |                  |                                                                                                                                       |   |                                                                                                                                                                                                                                                                                                                                                                                             |   |                 |                       |    |    |   |                    |                                                                                                                                                                                                                                                                                                                                                    |              |    |                                                                                                                                                                                                                                                                                                                                                                                                                         |                 |   |   |    |                                                                                                                                                                                                                                                |                     |   |                                                                                                                                                                                                                                                                                                                                                                                                                                                                                                                                                                                                                                                                      |                                                                         |   |                                                                                                                                                                                                                                                                                                                                                            |   |      |      |    |    |    |    |    |             |   |   |   |   |   |             |   |   |                                                                                                                              |  |  |                                                                                                                                                                                                                                                                                                                                                                                                                          |  |             |               |  |  |  |  |  |  |  |  |  |  |  |  |  |  |  |  |  |  |
| 2                                                                                                                                                                                                                                                                                                                                                                                                                                                                                                                                                                                                                                                                                                                                                                                                                                                                                                                                                                                                                                                                                                           | 2             |       |                                                                                |          |                                                                                                                                   |                                                                                                                                                                                                                                                                                                                                                                                                                                                                                                                                                                                                                                                                                                                                                                                                                                                                                                                                                                                                                                                                                                                                                                                                                                                      |                                                                                                                                                                                                                                                                                                                                                                                                                              |      |                                                                                         |      |     |                         |          |   |         |              |                       |     |   |     |                     |                       |              |     |     |                        |             |     |                                                                                                                                  |              |                                                                    |             |   |                                                                                                                                                                                  |   |               |                 |   |      |        |                     |                     |   |                                |    |                  |                                                                                                                                       |   |                                                                                                                                                                                                                                                                                                                                                                                             |   |                 |                       |    |    |   |                    |                                                                                                                                                                                                                                                                                                                                                    |              |    |                                                                                                                                                                                                                                                                                                                                                                                                                         |                 |   |   |    |                                                                                                                                                                                                                                                |                     |   |                                                                                                                                                                                                                                                                                                                                                                                                                                                                                                                                                                                                                                                                      |                                                                         |   |                                                                                                                                                                                                                                                                                                                                                            |   |      |      |    |    |    |    |    |             |   |   |   |   |   |             |   |   |                                                                                                                              |  |  |                                                                                                                                                                                                                                                                                                                                                                                                                          |  |             |               |  |  |  |  |  |  |  |  |  |  |  |  |  |  |  |  |  |  |
| 3                                                                                                                                                                                                                                                                                                                                                                                                                                                                                                                                                                                                                                                                                                                                                                                                                                                                                                                                                                                                                                                                                                           | 3             |       |                                                                                |          |                                                                                                                                   |                                                                                                                                                                                                                                                                                                                                                                                                                                                                                                                                                                                                                                                                                                                                                                                                                                                                                                                                                                                                                                                                                                                                                                                                                                                      |                                                                                                                                                                                                                                                                                                                                                                                                                              |      |                                                                                         |      |     |                         |          |   |         |              |                       |     |   |     |                     |                       |              |     |     |                        |             |     |                                                                                                                                  |              |                                                                    |             |   |                                                                                                                                                                                  |   |               |                 |   |      |        |                     |                     |   |                                |    |                  |                                                                                                                                       |   |                                                                                                                                                                                                                                                                                                                                                                                             |   |                 |                       |    |    |   |                    |                                                                                                                                                                                                                                                                                                                                                    |              |    |                                                                                                                                                                                                                                                                                                                                                                                                                         |                 |   |   |    |                                                                                                                                                                                                                                                |                     |   |                                                                                                                                                                                                                                                                                                                                                                                                                                                                                                                                                                                                                                                                      |                                                                         |   |                                                                                                                                                                                                                                                                                                                                                            |   |      |      |    |    |    |    |    |             |   |   |   |   |   |             |   |   |                                                                                                                              |  |  |                                                                                                                                                                                                                                                                                                                                                                                                                          |  |             |               |  |  |  |  |  |  |  |  |  |  |  |  |  |  |  |  |  |  |
| 4                                                                                                                                                                                                                                                                                                                                                                                                                                                                                                                                                                                                                                                                                                                                                                                                                                                                                                                                                                                                                                                                                                           | 4             |       |                                                                                |          |                                                                                                                                   |                                                                                                                                                                                                                                                                                                                                                                                                                                                                                                                                                                                                                                                                                                                                                                                                                                                                                                                                                                                                                                                                                                                                                                                                                                                      |                                                                                                                                                                                                                                                                                                                                                                                                                              |      |                                                                                         |      |     |                         |          |   |         |              |                       |     |   |     |                     |                       |              |     |     |                        |             |     |                                                                                                                                  |              |                                                                    |             |   |                                                                                                                                                                                  |   |               |                 |   |      |        |                     |                     |   |                                |    |                  |                                                                                                                                       |   |                                                                                                                                                                                                                                                                                                                                                                                             |   |                 |                       |    |    |   |                    |                                                                                                                                                                                                                                                                                                                                                    |              |    |                                                                                                                                                                                                                                                                                                                                                                                                                         |                 |   |   |    |                                                                                                                                                                                                                                                |                     |   |                                                                                                                                                                                                                                                                                                                                                                                                                                                                                                                                                                                                                                                                      |                                                                         |   |                                                                                                                                                                                                                                                                                                                                                            |   |      |      |    |    |    |    |    |             |   |   |   |   |   |             |   |   |                                                                                                                              |  |  |                                                                                                                                                                                                                                                                                                                                                                                                                          |  |             |               |  |  |  |  |  |  |  |  |  |  |  |  |  |  |  |  |  |  |
| 5                                                                                                                                                                                                                                                                                                                                                                                                                                                                                                                                                                                                                                                                                                                                                                                                                                                                                                                                                                                                                                                                                                           | 5             |       |                                                                                |          |                                                                                                                                   |                                                                                                                                                                                                                                                                                                                                                                                                                                                                                                                                                                                                                                                                                                                                                                                                                                                                                                                                                                                                                                                                                                                                                                                                                                                      |                                                                                                                                                                                                                                                                                                                                                                                                                              |      |                                                                                         |      |     |                         |          |   |         |              |                       |     |   |     |                     |                       |              |     |     |                        |             |     |                                                                                                                                  |              |                                                                    |             |   |                                                                                                                                                                                  |   |               |                 |   |      |        |                     |                     |   |                                |    |                  |                                                                                                                                       |   |                                                                                                                                                                                                                                                                                                                                                                                             |   |                 |                       |    |    |   |                    |                                                                                                                                                                                                                                                                                                                                                    |              |    |                                                                                                                                                                                                                                                                                                                                                                                                                         |                 |   |   |    |                                                                                                                                                                                                                                                |                     |   |                                                                                                                                                                                                                                                                                                                                                                                                                                                                                                                                                                                                                                                                      |                                                                         |   |                                                                                                                                                                                                                                                                                                                                                            |   |      |      |    |    |    |    |    |             |   |   |   |   |   |             |   |   |                                                                                                                              |  |  |                                                                                                                                                                                                                                                                                                                                                                                                                          |  |             |               |  |  |  |  |  |  |  |  |  |  |  |  |  |  |  |  |  |  |
| 8                                                                                                                                                                                                                                                                                                                                                                                                                                                                                                                                                                                                                                                                                                                                                                                                                                                                                                                                                                                                                                                                                                           | 8             |       |                                                                                |          |                                                                                                                                   |                                                                                                                                                                                                                                                                                                                                                                                                                                                                                                                                                                                                                                                                                                                                                                                                                                                                                                                                                                                                                                                                                                                                                                                                                                                      |                                                                                                                                                                                                                                                                                                                                                                                                                              |      |                                                                                         |      |     |                         |          |   |         |              |                       |     |   |     |                     |                       |              |     |     |                        |             |     |                                                                                                                                  |              |                                                                    |             |   |                                                                                                                                                                                  |   |               |                 |   |      |        |                     |                     |   |                                |    |                  |                                                                                                                                       |   |                                                                                                                                                                                                                                                                                                                                                                                             |   |                 |                       |    |    |   |                    |                                                                                                                                                                                                                                                                                                                                                    |              |    |                                                                                                                                                                                                                                                                                                                                                                                                                         |                 |   |   |    |                                                                                                                                                                                                                                                |                     |   |                                                                                                                                                                                                                                                                                                                                                                                                                                                                                                                                                                                                                                                                      |                                                                         |   |                                                                                                                                                                                                                                                                                                                                                            |   |      |      |    |    |    |    |    |             |   |   |   |   |   |             |   |   |                                                                                                                              |  |  |                                                                                                                                                                                                                                                                                                                                                                                                                          |  |             |               |  |  |  |  |  |  |  |  |  |  |  |  |  |  |  |  |  |  |
| 6690                                                                                                                                                                                                                                                                                                                                                                                                                                                                                                                                                                                                                                                                                                                                                                                                                                                                                                                                                                                                                                                                                                        | 6695          |       |                                                                                |          |                                                                                                                                   |                                                                                                                                                                                                                                                                                                                                                                                                                                                                                                                                                                                                                                                                                                                                                                                                                                                                                                                                                                                                                                                                                                                                                                                                                                                      |                                                                                                                                                                                                                                                                                                                                                                                                                              |      |                                                                                         |      |     |                         |          |   |         |              |                       |     |   |     |                     |                       |              |     |     |                        |             |     |                                                                                                                                  |              |                                                                    |             |   |                                                                                                                                                                                  |   |               |                 |   |      |        |                     |                     |   |                                |    |                  |                                                                                                                                       |   |                                                                                                                                                                                                                                                                                                                                                                                             |   |                 |                       |    |    |   |                    |                                                                                                                                                                                                                                                                                                                                                    |              |    |                                                                                                                                                                                                                                                                                                                                                                                                                         |                 |   |   |    |                                                                                                                                                                                                                                                |                     |   |                                                                                                                                                                                                                                                                                                                                                                                                                                                                                                                                                                                                                                                                      |                                                                         |   |                                                                                                                                                                                                                                                                                                                                                            |   |      |      |    |    |    |    |    |             |   |   |   |   |   |             |   |   |                                                                                                                              |  |  |                                                                                                                                                                                                                                                                                                                                                                                                                          |  |             |               |  |  |  |  |  |  |  |  |  |  |  |  |  |  |  |  |  |  |
| F2                                                                                                                                                                                                                                                                                                                                                                                                                                                                                                                                                                                                                                                                                                                                                                                                                                                                                                                                                                                                                                                                                                          | OG            |       |                                                                                |          |                                                                                                                                   |                                                                                                                                                                                                                                                                                                                                                                                                                                                                                                                                                                                                                                                                                                                                                                                                                                                                                                                                                                                                                                                                                                                                                                                                                                                      |                                                                                                                                                                                                                                                                                                                                                                                                                              |      |                                                                                         |      |     |                         |          |   |         |              |                       |     |   |     |                     |                       |              |     |     |                        |             |     |                                                                                                                                  |              |                                                                    |             |   |                                                                                                                                                                                  |   |               |                 |   |      |        |                     |                     |   |                                |    |                  |                                                                                                                                       |   |                                                                                                                                                                                                                                                                                                                                                                                             |   |                 |                       |    |    |   |                    |                                                                                                                                                                                                                                                                                                                                                    |              |    |                                                                                                                                                                                                                                                                                                                                                                                                                         |                 |   |   |    |                                                                                                                                                                                                                                                |                     |   |                                                                                                                                                                                                                                                                                                                                                                                                                                                                                                                                                                                                                                                                      |                                                                         |   |                                                                                                                                                                                                                                                                                                                                                            |   |      |      |    |    |    |    |    |             |   |   |   |   |   |             |   |   |                                                                                                                              |  |  |                                                                                                                                                                                                                                                                                                                                                                                                                          |  |             |               |  |  |  |  |  |  |  |  |  |  |  |  |  |  |  |  |  |  |
| 0                                                                                                                                                                                                                                                                                                                                                                                                                                                                                                                                                                                                                                                                                                                                                                                                                                                                                                                                                                                                                                                                                                           | 0             |       |                                                                                |          |                                                                                                                                   |                                                                                                                                                                                                                                                                                                                                                                                                                                                                                                                                                                                                                                                                                                                                                                                                                                                                                                                                                                                                                                                                                                                                                                                                                                                      |                                                                                                                                                                                                                                                                                                                                                                                                                              |      |                                                                                         |      |     |                         |          |   |         |              |                       |     |   |     |                     |                       |              |     |     |                        |             |     |                                                                                                                                  |              |                                                                    |             |   |                                                                                                                                                                                  |   |               |                 |   |      |        |                     |                     |   |                                |    |                  |                                                                                                                                       |   |                                                                                                                                                                                                                                                                                                                                                                                             |   |                 |                       |    |    |   |                    |                                                                                                                                                                                                                                                                                                                                                    |              |    |                                                                                                                                                                                                                                                                                                                                                                                                                         |                 |   |   |    |                                                                                                                                                                                                                                                |                     |   |                                                                                                                                                                                                                                                                                                                                                                                                                                                                                                                                                                                                                                                                      |                                                                         |   |                                                                                                                                                                                                                                                                                                                                                            |   |      |      |    |    |    |    |    |             |   |   |   |   |   |             |   |   |                                                                                                                              |  |  |                                                                                                                                                                                                                                                                                                                                                                                                                          |  |             |               |  |  |  |  |  |  |  |  |  |  |  |  |  |  |  |  |  |  |
| 1                                                                                                                                                                                                                                                                                                                                                                                                                                                                                                                                                                                                                                                                                                                                                                                                                                                                                                                                                                                                                                                                                                           | 1             |       |                                                                                |          |                                                                                                                                   |                                                                                                                                                                                                                                                                                                                                                                                                                                                                                                                                                                                                                                                                                                                                                                                                                                                                                                                                                                                                                                                                                                                                                                                                                                                      |                                                                                                                                                                                                                                                                                                                                                                                                                              |      |                                                                                         |      |     |                         |          |   |         |              |                       |     |   |     |                     |                       |              |     |     |                        |             |     |                                                                                                                                  |              |                                                                    |             |   |                                                                                                                                                                                  |   |               |                 |   |      |        |                     |                     |   |                                |    |                  |                                                                                                                                       |   |                                                                                                                                                                                                                                                                                                                                                                                             |   |                 |                       |    |    |   |                    |                                                                                                                                                                                                                                                                                                                                                    |              |    |                                                                                                                                                                                                                                                                                                                                                                                                                         |                 |   |   |    |                                                                                                                                                                                                                                                |                     |   |                                                                                                                                                                                                                                                                                                                                                                                                                                                                                                                                                                                                                                                                      |                                                                         |   |                                                                                                                                                                                                                                                                                                                                                            |   |      |      |    |    |    |    |    |             |   |   |   |   |   |             |   |   |                                                                                                                              |  |  |                                                                                                                                                                                                                                                                                                                                                                                                                          |  |             |               |  |  |  |  |  |  |  |  |  |  |  |  |  |  |  |  |  |  |
| 2                                                                                                                                                                                                                                                                                                                                                                                                                                                                                                                                                                                                                                                                                                                                                                                                                                                                                                                                                                                                                                                                                                           | 2             |       |                                                                                |          |                                                                                                                                   |                                                                                                                                                                                                                                                                                                                                                                                                                                                                                                                                                                                                                                                                                                                                                                                                                                                                                                                                                                                                                                                                                                                                                                                                                                                      |                                                                                                                                                                                                                                                                                                                                                                                                                              |      |                                                                                         |      |     |                         |          |   |         |              |                       |     |   |     |                     |                       |              |     |     |                        |             |     |                                                                                                                                  |              |                                                                    |             |   |                                                                                                                                                                                  |   |               |                 |   |      |        |                     |                     |   |                                |    |                  |                                                                                                                                       |   |                                                                                                                                                                                                                                                                                                                                                                                             |   |                 |                       |    |    |   |                    |                                                                                                                                                                                                                                                                                                                                                    |              |    |                                                                                                                                                                                                                                                                                                                                                                                                                         |                 |   |   |    |                                                                                                                                                                                                                                                |                     |   |                                                                                                                                                                                                                                                                                                                                                                                                                                                                                                                                                                                                                                                                      |                                                                         |   |                                                                                                                                                                                                                                                                                                                                                            |   |      |      |    |    |    |    |    |             |   |   |   |   |   |             |   |   |                                                                                                                              |  |  |                                                                                                                                                                                                                                                                                                                                                                                                                          |  |             |               |  |  |  |  |  |  |  |  |  |  |  |  |  |  |  |  |  |  |
| 3                                                                                                                                                                                                                                                                                                                                                                                                                                                                                                                                                                                                                                                                                                                                                                                                                                                                                                                                                                                                                                                                                                           | 3             |       |                                                                                |          |                                                                                                                                   |                                                                                                                                                                                                                                                                                                                                                                                                                                                                                                                                                                                                                                                                                                                                                                                                                                                                                                                                                                                                                                                                                                                                                                                                                                                      |                                                                                                                                                                                                                                                                                                                                                                                                                              |      |                                                                                         |      |     |                         |          |   |         |              |                       |     |   |     |                     |                       |              |     |     |                        |             |     |                                                                                                                                  |              |                                                                    |             |   |                                                                                                                                                                                  |   |               |                 |   |      |        |                     |                     |   |                                |    |                  |                                                                                                                                       |   |                                                                                                                                                                                                                                                                                                                                                                                             |   |                 |                       |    |    |   |                    |                                                                                                                                                                                                                                                                                                                                                    |              |    |                                                                                                                                                                                                                                                                                                                                                                                                                         |                 |   |   |    |                                                                                                                                                                                                                                                |                     |   |                                                                                                                                                                                                                                                                                                                                                                                                                                                                                                                                                                                                                                                                      |                                                                         |   |                                                                                                                                                                                                                                                                                                                                                            |   |      |      |    |    |    |    |    |             |   |   |   |   |   |             |   |   |                                                                                                                              |  |  |                                                                                                                                                                                                                                                                                                                                                                                                                          |  |             |               |  |  |  |  |  |  |  |  |  |  |  |  |  |  |  |  |  |  |
| 4                                                                                                                                                                                                                                                                                                                                                                                                                                                                                                                                                                                                                                                                                                                                                                                                                                                                                                                                                                                                                                                                                                           | 4             |       |                                                                                |          |                                                                                                                                   |                                                                                                                                                                                                                                                                                                                                                                                                                                                                                                                                                                                                                                                                                                                                                                                                                                                                                                                                                                                                                                                                                                                                                                                                                                                      |                                                                                                                                                                                                                                                                                                                                                                                                                              |      |                                                                                         |      |     |                         |          |   |         |              |                       |     |   |     |                     |                       |              |     |     |                        |             |     |                                                                                                                                  |              |                                                                    |             |   |                                                                                                                                                                                  |   |               |                 |   |      |        |                     |                     |   |                                |    |                  |                                                                                                                                       |   |                                                                                                                                                                                                                                                                                                                                                                                             |   |                 |                       |    |    |   |                    |                                                                                                                                                                                                                                                                                                                                                    |              |    |                                                                                                                                                                                                                                                                                                                                                                                                                         |                 |   |   |    |                                                                                                                                                                                                                                                |                     |   |                                                                                                                                                                                                                                                                                                                                                                                                                                                                                                                                                                                                                                                                      |                                                                         |   |                                                                                                                                                                                                                                                                                                                                                            |   |      |      |    |    |    |    |    |             |   |   |   |   |   |             |   |   |                                                                                                                              |  |  |                                                                                                                                                                                                                                                                                                                                                                                                                          |  |             |               |  |  |  |  |  |  |  |  |  |  |  |  |  |  |  |  |  |  |
| 8                                                                                                                                                                                                                                                                                                                                                                                                                                                                                                                                                                                                                                                                                                                                                                                                                                                                                                                                                                                                                                                                                                           | 8             |       |                                                                                |          |                                                                                                                                   |                                                                                                                                                                                                                                                                                                                                                                                                                                                                                                                                                                                                                                                                                                                                                                                                                                                                                                                                                                                                                                                                                                                                                                                                                                                      |                                                                                                                                                                                                                                                                                                                                                                                                                              |      |                                                                                         |      |     |                         |          |   |         |              |                       |     |   |     |                     |                       |              |     |     |                        |             |     |                                                                                                                                  |              |                                                                    |             |   |                                                                                                                                                                                  |   |               |                 |   |      |        |                     |                     |   |                                |    |                  |                                                                                                                                       |   |                                                                                                                                                                                                                                                                                                                                                                                             |   |                 |                       |    |    |   |                    |                                                                                                                                                                                                                                                                                                                                                    |              |    |                                                                                                                                                                                                                                                                                                                                                                                                                         |                 |   |   |    |                                                                                                                                                                                                                                                |                     |   |                                                                                                                                                                                                                                                                                                                                                                                                                                                                                                                                                                                                                                                                      |                                                                         |   |                                                                                                                                                                                                                                                                                                                                                            |   |      |      |    |    |    |    |    |             |   |   |   |   |   |             |   |   |                                                                                                                              |  |  |                                                                                                                                                                                                                                                                                                                                                                                                                          |  |             |               |  |  |  |  |  |  |  |  |  |  |  |  |  |  |  |  |  |  |
| 6715 ARM SC                                                                                                                                                                                                                                                                                                                                                                                                                                                                                                                                                                                                                                                                                                                                                                                                                                                                                                                                                                                                                                                                                                 | 6720 ARM PROG |       |                                                                                |          |                                                                                                                                   |                                                                                                                                                                                                                                                                                                                                                                                                                                                                                                                                                                                                                                                                                                                                                                                                                                                                                                                                                                                                                                                                                                                                                                                                                                                      |                                                                                                                                                                                                                                                                                                                                                                                                                              |      |                                                                                         |      |     |                         |          |   |         |              |                       |     |   |     |                     |                       |              |     |     |                        |             |     |                                                                                                                                  |              |                                                                    |             |   |                                                                                                                                                                                  |   |               |                 |   |      |        |                     |                     |   |                                |    |                  |                                                                                                                                       |   |                                                                                                                                                                                                                                                                                                                                                                                             |   |                 |                       |    |    |   |                    |                                                                                                                                                                                                                                                                                                                                                    |              |    |                                                                                                                                                                                                                                                                                                                                                                                                                         |                 |   |   |    |                                                                                                                                                                                                                                                |                     |   |                                                                                                                                                                                                                                                                                                                                                                                                                                                                                                                                                                                                                                                                      |                                                                         |   |                                                                                                                                                                                                                                                                                                                                                            |   |      |      |    |    |    |    |    |             |   |   |   |   |   |             |   |   |                                                                                                                              |  |  |                                                                                                                                                                                                                                                                                                                                                                                                                          |  |             |               |  |  |  |  |  |  |  |  |  |  |  |  |  |  |  |  |  |  |
|                                                                                                                                                                                                                                                                                                                                                                                                                                                                                                                                                                                                                                                                                                                                                                                                                                                                                                                                                                                                                                                                                                             |               |       |                                                                                |          |                                                                                                                                   |                                                                                                                                                                                                                                                                                                                                                                                                                                                                                                                                                                                                                                                                                                                                                                                                                                                                                                                                                                                                                                                                                                                                                                                                                                                      |                                                                                                                                                                                                                                                                                                                                                                                                                              |      |                                                                                         |      |     |                         |          |   |         |              |                       |     |   |     |                     |                       |              |     |     |                        |             |     |                                                                                                                                  |              |                                                                    |             |   |                                                                                                                                                                                  |   |               |                 |   |      |        |                     |                     |   |                                |    |                  |                                                                                                                                       |   |                                                                                                                                                                                                                                                                                                                                                                                             |   |                 |                       |    |    |   |                    |                                                                                                                                                                                                                                                                                                                                                    |              |    |                                                                                                                                                                                                                                                                                                                                                                                                                         |                 |   |   |    |                                                                                                                                                                                                                                                |                     |   |                                                                                                                                                                                                                                                                                                                                                                                                                                                                                                                                                                                                                                                                      |                                                                         |   |                                                                                                                                                                                                                                                                                                                                                            |   |      |      |    |    |    |    |    |             |   |   |   |   |   |             |   |   |                                                                                                                              |  |  |                                                                                                                                                                                                                                                                                                                                                                                                                          |  |             |               |  |  |  |  |  |  |  |  |  |  |  |  |  |  |  |  |  |  |
|                                                                                                                                                                                                                                                                                                                                                                                                                                                                                                                                                                                                                                                                                                                                                                                                                                                                                                                                                                                                                                                                                                             |               |       |                                                                                |          |                                                                                                                                   |                                                                                                                                                                                                                                                                                                                                                                                                                                                                                                                                                                                                                                                                                                                                                                                                                                                                                                                                                                                                                                                                                                                                                                                                                                                      |                                                                                                                                                                                                                                                                                                                                                                                                                              |      |                                                                                         |      |     |                         |          |   |         |              |                       |     |   |     |                     |                       |              |     |     |                        |             |     |                                                                                                                                  |              |                                                                    |             |   |                                                                                                                                                                                  |   |               |                 |   |      |        |                     |                     |   |                                |    |                  |                                                                                                                                       |   |                                                                                                                                                                                                                                                                                                                                                                                             |   |                 |                       |    |    |   |                    |                                                                                                                                                                                                                                                                                                                                                    |              |    |                                                                                                                                                                                                                                                                                                                                                                                                                         |                 |   |   |    |                                                                                                                                                                                                                                                |                     |   |                                                                                                                                                                                                                                                                                                                                                                                                                                                                                                                                                                                                                                                                      |                                                                         |   |                                                                                                                                                                                                                                                                                                                                                            |   |      |      |    |    |    |    |    |             |   |   |   |   |   |             |   |   |                                                                                                                              |  |  |                                                                                                                                                                                                                                                                                                                                                                                                                          |  |             |               |  |  |  |  |  |  |  |  |  |  |  |  |  |  |  |  |  |  |
|                                                                                                                                                                                                                                                                                                                                                                                                                                                                                                                                                                                                                                                                                                                                                                                                                                                                                                                                                                                                                                                                                                             |               |       |                                                                                |          |                                                                                                                                   |                                                                                                                                                                                                                                                                                                                                                                                                                                                                                                                                                                                                                                                                                                                                                                                                                                                                                                                                                                                                                                                                                                                                                                                                                                                      |                                                                                                                                                                                                                                                                                                                                                                                                                              |      |                                                                                         |      |     |                         |          |   |         |              |                       |     |   |     |                     |                       |              |     |     |                        |             |     |                                                                                                                                  |              |                                                                    |             |   |                                                                                                                                                                                  |   |               |                 |   |      |        |                     |                     |   |                                |    |                  |                                                                                                                                       |   |                                                                                                                                                                                                                                                                                                                                                                                             |   |                 |                       |    |    |   |                    |                                                                                                                                                                                                                                                                                                                                                    |              |    |                                                                                                                                                                                                                                                                                                                                                                                                                         |                 |   |   |    |                                                                                                                                                                                                                                                |                     |   |                                                                                                                                                                                                                                                                                                                                                                                                                                                                                                                                                                                                                                                                      |                                                                         |   |                                                                                                                                                                                                                                                                                                                                                            |   |      |      |    |    |    |    |    |             |   |   |   |   |   |             |   |   |                                                                                                                              |  |  |                                                                                                                                                                                                                                                                                                                                                                                                                          |  |             |               |  |  |  |  |  |  |  |  |  |  |  |  |  |  |  |  |  |  |
|                                                                                                                                                                                                                                                                                                                                                                                                                                                                                                                                                                                                                                                                                                                                                                                                                                                                                                                                                                                                                                                                                                             |               |       |                                                                                |          |                                                                                                                                   |                                                                                                                                                                                                                                                                                                                                                                                                                                                                                                                                                                                                                                                                                                                                                                                                                                                                                                                                                                                                                                                                                                                                                                                                                                                      |                                                                                                                                                                                                                                                                                                                                                                                                                              |      |                                                                                         |      |     |                         |          |   |         |              |                       |     |   |     |                     |                       |              |     |     |                        |             |     |                                                                                                                                  |              |                                                                    |             |   |                                                                                                                                                                                  |   |               |                 |   |      |        |                     |                     |   |                                |    |                  |                                                                                                                                       |   |                                                                                                                                                                                                                                                                                                                                                                                             |   |                 |                       |    |    |   |                    |                                                                                                                                                                                                                                                                                                                                                    |              |    |                                                                                                                                                                                                                                                                                                                                                                                                                         |                 |   |   |    |                                                                                                                                                                                                                                                |                     |   |                                                                                                                                                                                                                                                                                                                                                                                                                                                                                                                                                                                                                                                                      |                                                                         |   |                                                                                                                                                                                                                                                                                                                                                            |   |      |      |    |    |    |    |    |             |   |   |   |   |   |             |   |   |                                                                                                                              |  |  |                                                                                                                                                                                                                                                                                                                                                                                                                          |  |             |               |  |  |  |  |  |  |  |  |  |  |  |  |  |  |  |  |  |  |
|                                                                                                                                                                                                                                                                                                                                                                                                                                                                                                                                                                                                                                                                                                                                                                                                                                                                                                                                                                                                                                                                                                             |               |       |                                                                                |          |                                                                                                                                   |                                                                                                                                                                                                                                                                                                                                                                                                                                                                                                                                                                                                                                                                                                                                                                                                                                                                                                                                                                                                                                                                                                                                                                                                                                                      |                                                                                                                                                                                                                                                                                                                                                                                                                              |      |                                                                                         |      |     |                         |          |   |         |              |                       |     |   |     |                     |                       |              |     |     |                        |             |     |                                                                                                                                  |              |                                                                    |             |   |                                                                                                                                                                                  |   |               |                 |   |      |        |                     |                     |   |                                |    |                  |                                                                                                                                       |   |                                                                                                                                                                                                                                                                                                                                                                                             |   |                 |                       |    |    |   |                    |                                                                                                                                                                                                                                                                                                                                                    |              |    |                                                                                                                                                                                                                                                                                                                                                                                                                         |                 |   |   |    |                                                                                                                                                                                                                                                |                     |   |                                                                                                                                                                                                                                                                                                                                                                                                                                                                                                                                                                                                                                                                      |                                                                         |   |                                                                                                                                                                                                                                                                                                                                                            |   |      |      |    |    |    |    |    |             |   |   |   |   |   |             |   |   |                                                                                                                              |  |  |                                                                                                                                                                                                                                                                                                                                                                                                                          |  |             |               |  |  |  |  |  |  |  |  |  |  |  |  |  |  |  |  |  |  |
|                                                                                                                                                                                                                                                                                                                                                                                                                                                                                                                                                                                                                                                                                                                                                                                                                                                                                                                                                                                                                                                                                                             |               |       |                                                                                |          |                                                                                                                                   |                                                                                                                                                                                                                                                                                                                                                                                                                                                                                                                                                                                                                                                                                                                                                                                                                                                                                                                                                                                                                                                                                                                                                                                                                                                      |                                                                                                                                                                                                                                                                                                                                                                                                                              |      |                                                                                         |      |     |                         |          |   |         |              |                       |     |   |     |                     |                       |              |     |     |                        |             |     |                                                                                                                                  |              |                                                                    |             |   |                                                                                                                                                                                  |   |               |                 |   |      |        |                     |                     |   |                                |    |                  |                                                                                                                                       |   |                                                                                                                                                                                                                                                                                                                                                                                             |   |                 |                       |    |    |   |                    |                                                                                                                                                                                                                                                                                                                                                    |              |    |                                                                                                                                                                                                                                                                                                                                                                                                                         |                 |   |   |    |                                                                                                                                                                                                                                                |                     |   |                                                                                                                                                                                                                                                                                                                                                                                                                                                                                                                                                                                                                                                                      |                                                                         |   |                                                                                                                                                                                                                                                                                                                                                            |   |      |      |    |    |    |    |    |             |   |   |   |   |   |             |   |   |                                                                                                                              |  |  |                                                                                                                                                                                                                                                                                                                                                                                                                          |  |             |               |  |  |  |  |  |  |  |  |  |  |  |  |  |  |  |  |  |  |
|                                                                                                                                                                                                                                                                                                                                                                                                                                                                                                                                                                                                                                                                                                                                                                                                                                                                                                                                                                                                                                                                                                             |               |       |                                                                                |          |                                                                                                                                   |                                                                                                                                                                                                                                                                                                                                                                                                                                                                                                                                                                                                                                                                                                                                                                                                                                                                                                                                                                                                                                                                                                                                                                                                                                                      |                                                                                                                                                                                                                                                                                                                                                                                                                              |      |                                                                                         |      |     |                         |          |   |         |              |                       |     |   |     |                     |                       |              |     |     |                        |             |     |                                                                                                                                  |              |                                                                    |             |   |                                                                                                                                                                                  |   |               |                 |   |      |        |                     |                     |   |                                |    |                  |                                                                                                                                       |   |                                                                                                                                                                                                                                                                                                                                                                                             |   |                 |                       |    |    |   |                    |                                                                                                                                                                                                                                                                                                                                                    |              |    |                                                                                                                                                                                                                                                                                                                                                                                                                         |                 |   |   |    |                                                                                                                                                                                                                                                |                     |   |                                                                                                                                                                                                                                                                                                                                                                                                                                                                                                                                                                                                                                                                      |                                                                         |   |                                                                                                                                                                                                                                                                                                                                                            |   |      |      |    |    |    |    |    |             |   |   |   |   |   |             |   |   |                                                                                                                              |  |  |                                                                                                                                                                                                                                                                                                                                                                                                                          |  |             |               |  |  |  |  |  |  |  |  |  |  |  |  |  |  |  |  |  |  |
|                                                                                                                                                                                                                                                                                                                                                                                                                                                                                                                                                                                                                                                                                                                                                                                                                                                                                                                                                                                                                                                                                                             |               |       |                                                                                |          |                                                                                                                                   |                                                                                                                                                                                                                                                                                                                                                                                                                                                                                                                                                                                                                                                                                                                                                                                                                                                                                                                                                                                                                                                                                                                                                                                                                                                      |                                                                                                                                                                                                                                                                                                                                                                                                                              |      |                                                                                         |      |     |                         |          |   |         |              |                       |     |   |     |                     |                       |              |     |     |                        |             |     |                                                                                                                                  |              |                                                                    |             |   |                                                                                                                                                                                  |   |               |                 |   |      |        |                     |                     |   |                                |    |                  |                                                                                                                                       |   |                                                                                                                                                                                                                                                                                                                                                                                             |   |                 |                       |    |    |   |                    |                                                                                                                                                                                                                                                                                                                                                    |              |    |                                                                                                                                                                                                                                                                                                                                                                                                                         |                 |   |   |    |                                                                                                                                                                                                                                                |                     |   |                                                                                                                                                                                                                                                                                                                                                                                                                                                                                                                                                                                                                                                                      |                                                                         |   |                                                                                                                                                                                                                                                                                                                                                            |   |      |      |    |    |    |    |    |             |   |   |   |   |   |             |   |   |                                                                                                                              |  |  |                                                                                                                                                                                                                                                                                                                                                                                                                          |  |             |               |  |  |  |  |  |  |  |  |  |  |  |  |  |  |  |  |  |  |
|                                                                                                                                                                                                                                                                                                                                                                                                                                                                                                                                                                                                                                                                                                                                                                                                                                                                                                                                                                                                                                                                                                             |               |       |                                                                                |          |                                                                                                                                   |                                                                                                                                                                                                                                                                                                                                                                                                                                                                                                                                                                                                                                                                                                                                                                                                                                                                                                                                                                                                                                                                                                                                                                                                                                                      |                                                                                                                                                                                                                                                                                                                                                                                                                              |      |                                                                                         |      |     |                         |          |   |         |              |                       |     |   |     |                     |                       |              |     |     |                        |             |     |                                                                                                                                  |              |                                                                    |             |   |                                                                                                                                                                                  |   |               |                 |   |      |        |                     |                     |   |                                |    |                  |                                                                                                                                       |   |                                                                                                                                                                                                                                                                                                                                                                                             |   |                 |                       |    |    |   |                    |                                                                                                                                                                                                                                                                                                                                                    |              |    |                                                                                                                                                                                                                                                                                                                                                                                                                         |                 |   |   |    |                                                                                                                                                                                                                                                |                     |   |                                                                                                                                                                                                                                                                                                                                                                                                                                                                                                                                                                                                                                                                      |                                                                         |   |                                                                                                                                                                                                                                                                                                                                                            |   |      |      |    |    |    |    |    |             |   |   |   |   |   |             |   |   |                                                                                                                              |  |  |                                                                                                                                                                                                                                                                                                                                                                                                                          |  |             |               |  |  |  |  |  |  |  |  |  |  |  |  |  |  |  |  |  |  |
| <b>6560 F2 QUALITY</b><br>Good 1<br>Fair 2<br>Bord/Poor 3<br>CG 8<br><b>TO PROBS</b>                                                                                                                                                                                                                                                                                                                                                                                                                                                                                                                                                                                                                                                                                                                                                                                                                                                                                                                                                                                                                        |               |       | <b>6660 ART-NAR</b><br>None 0<br>Quest 1<br>< Std #19 2<br>≥ Std #19 3<br>CG 8 |          | <b>AREA</b><br>N/A<br>< Std C <sub>0</sub><br>< Std C <sub>1</sub><br>< Std C <sub>2</sub><br>< Std I <sub>2</sub>                |                                                                                                                                                                                                                                                                                                                                                                                                                                                                                                                                                                                                                                                                                                                                                                                                                                                                                                                                                                                                                                                                                                                                                                                                                                                      | <table border="1" style="width:100%; border-collapse: collapse;"> <tr> <th>6675</th> <th>6685</th> </tr> <tr> <th>F2</th> <th>OG</th> </tr> <tr> <td>0</td> <td>0</td> </tr> <tr> <td>1</td> <td>1</td> </tr> <tr> <td>2</td> <td>2</td> </tr> <tr> <td>3</td> <td>3</td> </tr> <tr> <td>4</td> <td>4</td> </tr> <tr> <td>5</td> <td>5</td> </tr> <tr> <td>6</td> <td>6</td> </tr> <tr> <td>8</td> <td>8</td> </tr> </table> |      | 6675                                                                                    | 6685 | F2  | OG                      | 0        | 0 | 1       | 1            | 2                     | 2   | 3 | 3   | 4                   | 4                     | 5            | 5   | 6   | 6                      | 8           | 8   | <b>6700 RPE-DEP</b><br>Absent 0<br>Quest 1<br>< Std C <sub>2</sub> 2<br>< Std O <sub>2</sub> 3<br>≥ Std O <sub>2</sub> 4<br>CG 8 |              | <b>6750 RPE-DEP-CC</b><br>Absent 0<br>Quest 1<br>Present 2<br>CG 8 |             |   | <table border="1" style="width:100%; border-collapse: collapse;"> <tr> <th colspan="3">6725 ARM FLAG</th> </tr> <tr> <td>0 No</td> <td>1 Qual</td> <td>2 Oth</td> </tr> </table> |   | 6725 ARM FLAG |                 |   | 0 No | 1 Qual | 2 Oth               |                     |   |                                |    |                  |                                                                                                                                       |   |                                                                                                                                                                                                                                                                                                                                                                                             |   |                 |                       |    |    |   |                    |                                                                                                                                                                                                                                                                                                                                                    |              |    |                                                                                                                                                                                                                                                                                                                                                                                                                         |                 |   |   |    |                                                                                                                                                                                                                                                |                     |   |                                                                                                                                                                                                                                                                                                                                                                                                                                                                                                                                                                                                                                                                      |                                                                         |   |                                                                                                                                                                                                                                                                                                                                                            |   |      |      |    |    |    |    |    |             |   |   |   |   |   |             |   |   |                                                                                                                              |  |  |                                                                                                                                                                                                                                                                                                                                                                                                                          |  |             |               |  |  |  |  |  |  |  |  |  |  |  |  |  |  |  |  |  |  |
| 6675                                                                                                                                                                                                                                                                                                                                                                                                                                                                                                                                                                                                                                                                                                                                                                                                                                                                                                                                                                                                                                                                                                        | 6685          |       |                                                                                |          |                                                                                                                                   |                                                                                                                                                                                                                                                                                                                                                                                                                                                                                                                                                                                                                                                                                                                                                                                                                                                                                                                                                                                                                                                                                                                                                                                                                                                      |                                                                                                                                                                                                                                                                                                                                                                                                                              |      |                                                                                         |      |     |                         |          |   |         |              |                       |     |   |     |                     |                       |              |     |     |                        |             |     |                                                                                                                                  |              |                                                                    |             |   |                                                                                                                                                                                  |   |               |                 |   |      |        |                     |                     |   |                                |    |                  |                                                                                                                                       |   |                                                                                                                                                                                                                                                                                                                                                                                             |   |                 |                       |    |    |   |                    |                                                                                                                                                                                                                                                                                                                                                    |              |    |                                                                                                                                                                                                                                                                                                                                                                                                                         |                 |   |   |    |                                                                                                                                                                                                                                                |                     |   |                                                                                                                                                                                                                                                                                                                                                                                                                                                                                                                                                                                                                                                                      |                                                                         |   |                                                                                                                                                                                                                                                                                                                                                            |   |      |      |    |    |    |    |    |             |   |   |   |   |   |             |   |   |                                                                                                                              |  |  |                                                                                                                                                                                                                                                                                                                                                                                                                          |  |             |               |  |  |  |  |  |  |  |  |  |  |  |  |  |  |  |  |  |  |
| F2                                                                                                                                                                                                                                                                                                                                                                                                                                                                                                                                                                                                                                                                                                                                                                                                                                                                                                                                                                                                                                                                                                          | OG            |       |                                                                                |          |                                                                                                                                   |                                                                                                                                                                                                                                                                                                                                                                                                                                                                                                                                                                                                                                                                                                                                                                                                                                                                                                                                                                                                                                                                                                                                                                                                                                                      |                                                                                                                                                                                                                                                                                                                                                                                                                              |      |                                                                                         |      |     |                         |          |   |         |              |                       |     |   |     |                     |                       |              |     |     |                        |             |     |                                                                                                                                  |              |                                                                    |             |   |                                                                                                                                                                                  |   |               |                 |   |      |        |                     |                     |   |                                |    |                  |                                                                                                                                       |   |                                                                                                                                                                                                                                                                                                                                                                                             |   |                 |                       |    |    |   |                    |                                                                                                                                                                                                                                                                                                                                                    |              |    |                                                                                                                                                                                                                                                                                                                                                                                                                         |                 |   |   |    |                                                                                                                                                                                                                                                |                     |   |                                                                                                                                                                                                                                                                                                                                                                                                                                                                                                                                                                                                                                                                      |                                                                         |   |                                                                                                                                                                                                                                                                                                                                                            |   |      |      |    |    |    |    |    |             |   |   |   |   |   |             |   |   |                                                                                                                              |  |  |                                                                                                                                                                                                                                                                                                                                                                                                                          |  |             |               |  |  |  |  |  |  |  |  |  |  |  |  |  |  |  |  |  |  |
| 0                                                                                                                                                                                                                                                                                                                                                                                                                                                                                                                                                                                                                                                                                                                                                                                                                                                                                                                                                                                                                                                                                                           | 0             |       |                                                                                |          |                                                                                                                                   |                                                                                                                                                                                                                                                                                                                                                                                                                                                                                                                                                                                                                                                                                                                                                                                                                                                                                                                                                                                                                                                                                                                                                                                                                                                      |                                                                                                                                                                                                                                                                                                                                                                                                                              |      |                                                                                         |      |     |                         |          |   |         |              |                       |     |   |     |                     |                       |              |     |     |                        |             |     |                                                                                                                                  |              |                                                                    |             |   |                                                                                                                                                                                  |   |               |                 |   |      |        |                     |                     |   |                                |    |                  |                                                                                                                                       |   |                                                                                                                                                                                                                                                                                                                                                                                             |   |                 |                       |    |    |   |                    |                                                                                                                                                                                                                                                                                                                                                    |              |    |                                                                                                                                                                                                                                                                                                                                                                                                                         |                 |   |   |    |                                                                                                                                                                                                                                                |                     |   |                                                                                                                                                                                                                                                                                                                                                                                                                                                                                                                                                                                                                                                                      |                                                                         |   |                                                                                                                                                                                                                                                                                                                                                            |   |      |      |    |    |    |    |    |             |   |   |   |   |   |             |   |   |                                                                                                                              |  |  |                                                                                                                                                                                                                                                                                                                                                                                                                          |  |             |               |  |  |  |  |  |  |  |  |  |  |  |  |  |  |  |  |  |  |
| 1                                                                                                                                                                                                                                                                                                                                                                                                                                                                                                                                                                                                                                                                                                                                                                                                                                                                                                                                                                                                                                                                                                           | 1             |       |                                                                                |          |                                                                                                                                   |                                                                                                                                                                                                                                                                                                                                                                                                                                                                                                                                                                                                                                                                                                                                                                                                                                                                                                                                                                                                                                                                                                                                                                                                                                                      |                                                                                                                                                                                                                                                                                                                                                                                                                              |      |                                                                                         |      |     |                         |          |   |         |              |                       |     |   |     |                     |                       |              |     |     |                        |             |     |                                                                                                                                  |              |                                                                    |             |   |                                                                                                                                                                                  |   |               |                 |   |      |        |                     |                     |   |                                |    |                  |                                                                                                                                       |   |                                                                                                                                                                                                                                                                                                                                                                                             |   |                 |                       |    |    |   |                    |                                                                                                                                                                                                                                                                                                                                                    |              |    |                                                                                                                                                                                                                                                                                                                                                                                                                         |                 |   |   |    |                                                                                                                                                                                                                                                |                     |   |                                                                                                                                                                                                                                                                                                                                                                                                                                                                                                                                                                                                                                                                      |                                                                         |   |                                                                                                                                                                                                                                                                                                                                                            |   |      |      |    |    |    |    |    |             |   |   |   |   |   |             |   |   |                                                                                                                              |  |  |                                                                                                                                                                                                                                                                                                                                                                                                                          |  |             |               |  |  |  |  |  |  |  |  |  |  |  |  |  |  |  |  |  |  |
| 2                                                                                                                                                                                                                                                                                                                                                                                                                                                                                                                                                                                                                                                                                                                                                                                                                                                                                                                                                                                                                                                                                                           | 2             |       |                                                                                |          |                                                                                                                                   |                                                                                                                                                                                                                                                                                                                                                                                                                                                                                                                                                                                                                                                                                                                                                                                                                                                                                                                                                                                                                                                                                                                                                                                                                                                      |                                                                                                                                                                                                                                                                                                                                                                                                                              |      |                                                                                         |      |     |                         |          |   |         |              |                       |     |   |     |                     |                       |              |     |     |                        |             |     |                                                                                                                                  |              |                                                                    |             |   |                                                                                                                                                                                  |   |               |                 |   |      |        |                     |                     |   |                                |    |                  |                                                                                                                                       |   |                                                                                                                                                                                                                                                                                                                                                                                             |   |                 |                       |    |    |   |                    |                                                                                                                                                                                                                                                                                                                                                    |              |    |                                                                                                                                                                                                                                                                                                                                                                                                                         |                 |   |   |    |                                                                                                                                                                                                                                                |                     |   |                                                                                                                                                                                                                                                                                                                                                                                                                                                                                                                                                                                                                                                                      |                                                                         |   |                                                                                                                                                                                                                                                                                                                                                            |   |      |      |    |    |    |    |    |             |   |   |   |   |   |             |   |   |                                                                                                                              |  |  |                                                                                                                                                                                                                                                                                                                                                                                                                          |  |             |               |  |  |  |  |  |  |  |  |  |  |  |  |  |  |  |  |  |  |
| 3                                                                                                                                                                                                                                                                                                                                                                                                                                                                                                                                                                                                                                                                                                                                                                                                                                                                                                                                                                                                                                                                                                           | 3             |       |                                                                                |          |                                                                                                                                   |                                                                                                                                                                                                                                                                                                                                                                                                                                                                                                                                                                                                                                                                                                                                                                                                                                                                                                                                                                                                                                                                                                                                                                                                                                                      |                                                                                                                                                                                                                                                                                                                                                                                                                              |      |                                                                                         |      |     |                         |          |   |         |              |                       |     |   |     |                     |                       |              |     |     |                        |             |     |                                                                                                                                  |              |                                                                    |             |   |                                                                                                                                                                                  |   |               |                 |   |      |        |                     |                     |   |                                |    |                  |                                                                                                                                       |   |                                                                                                                                                                                                                                                                                                                                                                                             |   |                 |                       |    |    |   |                    |                                                                                                                                                                                                                                                                                                                                                    |              |    |                                                                                                                                                                                                                                                                                                                                                                                                                         |                 |   |   |    |                                                                                                                                                                                                                                                |                     |   |                                                                                                                                                                                                                                                                                                                                                                                                                                                                                                                                                                                                                                                                      |                                                                         |   |                                                                                                                                                                                                                                                                                                                                                            |   |      |      |    |    |    |    |    |             |   |   |   |   |   |             |   |   |                                                                                                                              |  |  |                                                                                                                                                                                                                                                                                                                                                                                                                          |  |             |               |  |  |  |  |  |  |  |  |  |  |  |  |  |  |  |  |  |  |
| 4                                                                                                                                                                                                                                                                                                                                                                                                                                                                                                                                                                                                                                                                                                                                                                                                                                                                                                                                                                                                                                                                                                           | 4             |       |                                                                                |          |                                                                                                                                   |                                                                                                                                                                                                                                                                                                                                                                                                                                                                                                                                                                                                                                                                                                                                                                                                                                                                                                                                                                                                                                                                                                                                                                                                                                                      |                                                                                                                                                                                                                                                                                                                                                                                                                              |      |                                                                                         |      |     |                         |          |   |         |              |                       |     |   |     |                     |                       |              |     |     |                        |             |     |                                                                                                                                  |              |                                                                    |             |   |                                                                                                                                                                                  |   |               |                 |   |      |        |                     |                     |   |                                |    |                  |                                                                                                                                       |   |                                                                                                                                                                                                                                                                                                                                                                                             |   |                 |                       |    |    |   |                    |                                                                                                                                                                                                                                                                                                                                                    |              |    |                                                                                                                                                                                                                                                                                                                                                                                                                         |                 |   |   |    |                                                                                                                                                                                                                                                |                     |   |                                                                                                                                                                                                                                                                                                                                                                                                                                                                                                                                                                                                                                                                      |                                                                         |   |                                                                                                                                                                                                                                                                                                                                                            |   |      |      |    |    |    |    |    |             |   |   |   |   |   |             |   |   |                                                                                                                              |  |  |                                                                                                                                                                                                                                                                                                                                                                                                                          |  |             |               |  |  |  |  |  |  |  |  |  |  |  |  |  |  |  |  |  |  |
| 5                                                                                                                                                                                                                                                                                                                                                                                                                                                                                                                                                                                                                                                                                                                                                                                                                                                                                                                                                                                                                                                                                                           | 5             |       |                                                                                |          |                                                                                                                                   |                                                                                                                                                                                                                                                                                                                                                                                                                                                                                                                                                                                                                                                                                                                                                                                                                                                                                                                                                                                                                                                                                                                                                                                                                                                      |                                                                                                                                                                                                                                                                                                                                                                                                                              |      |                                                                                         |      |     |                         |          |   |         |              |                       |     |   |     |                     |                       |              |     |     |                        |             |     |                                                                                                                                  |              |                                                                    |             |   |                                                                                                                                                                                  |   |               |                 |   |      |        |                     |                     |   |                                |    |                  |                                                                                                                                       |   |                                                                                                                                                                                                                                                                                                                                                                                             |   |                 |                       |    |    |   |                    |                                                                                                                                                                                                                                                                                                                                                    |              |    |                                                                                                                                                                                                                                                                                                                                                                                                                         |                 |   |   |    |                                                                                                                                                                                                                                                |                     |   |                                                                                                                                                                                                                                                                                                                                                                                                                                                                                                                                                                                                                                                                      |                                                                         |   |                                                                                                                                                                                                                                                                                                                                                            |   |      |      |    |    |    |    |    |             |   |   |   |   |   |             |   |   |                                                                                                                              |  |  |                                                                                                                                                                                                                                                                                                                                                                                                                          |  |             |               |  |  |  |  |  |  |  |  |  |  |  |  |  |  |  |  |  |  |
| 6                                                                                                                                                                                                                                                                                                                                                                                                                                                                                                                                                                                                                                                                                                                                                                                                                                                                                                                                                                                                                                                                                                           | 6             |       |                                                                                |          |                                                                                                                                   |                                                                                                                                                                                                                                                                                                                                                                                                                                                                                                                                                                                                                                                                                                                                                                                                                                                                                                                                                                                                                                                                                                                                                                                                                                                      |                                                                                                                                                                                                                                                                                                                                                                                                                              |      |                                                                                         |      |     |                         |          |   |         |              |                       |     |   |     |                     |                       |              |     |     |                        |             |     |                                                                                                                                  |              |                                                                    |             |   |                                                                                                                                                                                  |   |               |                 |   |      |        |                     |                     |   |                                |    |                  |                                                                                                                                       |   |                                                                                                                                                                                                                                                                                                                                                                                             |   |                 |                       |    |    |   |                    |                                                                                                                                                                                                                                                                                                                                                    |              |    |                                                                                                                                                                                                                                                                                                                                                                                                                         |                 |   |   |    |                                                                                                                                                                                                                                                |                     |   |                                                                                                                                                                                                                                                                                                                                                                                                                                                                                                                                                                                                                                                                      |                                                                         |   |                                                                                                                                                                                                                                                                                                                                                            |   |      |      |    |    |    |    |    |             |   |   |   |   |   |             |   |   |                                                                                                                              |  |  |                                                                                                                                                                                                                                                                                                                                                                                                                          |  |             |               |  |  |  |  |  |  |  |  |  |  |  |  |  |  |  |  |  |  |
| 8                                                                                                                                                                                                                                                                                                                                                                                                                                                                                                                                                                                                                                                                                                                                                                                                                                                                                                                                                                                                                                                                                                           | 8             |       |                                                                                |          |                                                                                                                                   |                                                                                                                                                                                                                                                                                                                                                                                                                                                                                                                                                                                                                                                                                                                                                                                                                                                                                                                                                                                                                                                                                                                                                                                                                                                      |                                                                                                                                                                                                                                                                                                                                                                                                                              |      |                                                                                         |      |     |                         |          |   |         |              |                       |     |   |     |                     |                       |              |     |     |                        |             |     |                                                                                                                                  |              |                                                                    |             |   |                                                                                                                                                                                  |   |               |                 |   |      |        |                     |                     |   |                                |    |                  |                                                                                                                                       |   |                                                                                                                                                                                                                                                                                                                                                                                             |   |                 |                       |    |    |   |                    |                                                                                                                                                                                                                                                                                                                                                    |              |    |                                                                                                                                                                                                                                                                                                                                                                                                                         |                 |   |   |    |                                                                                                                                                                                                                                                |                     |   |                                                                                                                                                                                                                                                                                                                                                                                                                                                                                                                                                                                                                                                                      |                                                                         |   |                                                                                                                                                                                                                                                                                                                                                            |   |      |      |    |    |    |    |    |             |   |   |   |   |   |             |   |   |                                                                                                                              |  |  |                                                                                                                                                                                                                                                                                                                                                                                                                          |  |             |               |  |  |  |  |  |  |  |  |  |  |  |  |  |  |  |  |  |  |
| 6725 ARM FLAG                                                                                                                                                                                                                                                                                                                                                                                                                                                                                                                                                                                                                                                                                                                                                                                                                                                                                                                                                                                                                                                                                               |               |       |                                                                                |          |                                                                                                                                   |                                                                                                                                                                                                                                                                                                                                                                                                                                                                                                                                                                                                                                                                                                                                                                                                                                                                                                                                                                                                                                                                                                                                                                                                                                                      |                                                                                                                                                                                                                                                                                                                                                                                                                              |      |                                                                                         |      |     |                         |          |   |         |              |                       |     |   |     |                     |                       |              |     |     |                        |             |     |                                                                                                                                  |              |                                                                    |             |   |                                                                                                                                                                                  |   |               |                 |   |      |        |                     |                     |   |                                |    |                  |                                                                                                                                       |   |                                                                                                                                                                                                                                                                                                                                                                                             |   |                 |                       |    |    |   |                    |                                                                                                                                                                                                                                                                                                                                                    |              |    |                                                                                                                                                                                                                                                                                                                                                                                                                         |                 |   |   |    |                                                                                                                                                                                                                                                |                     |   |                                                                                                                                                                                                                                                                                                                                                                                                                                                                                                                                                                                                                                                                      |                                                                         |   |                                                                                                                                                                                                                                                                                                                                                            |   |      |      |    |    |    |    |    |             |   |   |   |   |   |             |   |   |                                                                                                                              |  |  |                                                                                                                                                                                                                                                                                                                                                                                                                          |  |             |               |  |  |  |  |  |  |  |  |  |  |  |  |  |  |  |  |  |  |
| 0 No                                                                                                                                                                                                                                                                                                                                                                                                                                                                                                                                                                                                                                                                                                                                                                                                                                                                                                                                                                                                                                                                                                        | 1 Qual        | 2 Oth |                                                                                |          |                                                                                                                                   |                                                                                                                                                                                                                                                                                                                                                                                                                                                                                                                                                                                                                                                                                                                                                                                                                                                                                                                                                                                                                                                                                                                                                                                                                                                      |                                                                                                                                                                                                                                                                                                                                                                                                                              |      |                                                                                         |      |     |                         |          |   |         |              |                       |     |   |     |                     |                       |              |     |     |                        |             |     |                                                                                                                                  |              |                                                                    |             |   |                                                                                                                                                                                  |   |               |                 |   |      |        |                     |                     |   |                                |    |                  |                                                                                                                                       |   |                                                                                                                                                                                                                                                                                                                                                                                             |   |                 |                       |    |    |   |                    |                                                                                                                                                                                                                                                                                                                                                    |              |    |                                                                                                                                                                                                                                                                                                                                                                                                                         |                 |   |   |    |                                                                                                                                                                                                                                                |                     |   |                                                                                                                                                                                                                                                                                                                                                                                                                                                                                                                                                                                                                                                                      |                                                                         |   |                                                                                                                                                                                                                                                                                                                                                            |   |      |      |    |    |    |    |    |             |   |   |   |   |   |             |   |   |                                                                                                                              |  |  |                                                                                                                                                                                                                                                                                                                                                                                                                          |  |             |               |  |  |  |  |  |  |  |  |  |  |  |  |  |  |  |  |  |  |
| <b>6565 FOCUS</b><br>Good Fair Ex Unex CG<br>0 1 2 8<br><b>6570 Field</b> 0 -- 2 8<br><b>6575 Stereo</b> 0 1 2 8<br><b>6580 Other</b> 0 1 2 8                                                                                                                                                                                                                                                                                                                                                                                                                                                                                                                                                                                                                                                                                                                                                                                                                                                                                                                                                               |               |       | <b>6665 A/V-NICK</b><br>Absent 0<br>Quest 1<br>Present 2<br>CG 8<br>NA 9       |          | <b>CG</b><br>< Std C <sub>0</sub><br>< Std C <sub>1</sub><br>< Std C <sub>2</sub><br>< Std I <sub>2</sub><br>≥ Std O <sub>2</sub> |                                                                                                                                                                                                                                                                                                                                                                                                                                                                                                                                                                                                                                                                                                                                                                                                                                                                                                                                                                                                                                                                                                                                                                                                                                                      | <b>6730 ARM EXAMPLE</b><br>0 No 1+ Yes, see list                                                                                                                                                                                                                                                                                                                                                                             |      |                                                                                         |      |     |                         |          |   |         |              |                       |     |   |     |                     |                       |              |     |     |                        |             |     |                                                                                                                                  |              |                                                                    |             |   |                                                                                                                                                                                  |   |               |                 |   |      |        |                     |                     |   |                                |    |                  |                                                                                                                                       |   |                                                                                                                                                                                                                                                                                                                                                                                             |   |                 |                       |    |    |   |                    |                                                                                                                                                                                                                                                                                                                                                    |              |    |                                                                                                                                                                                                                                                                                                                                                                                                                         |                 |   |   |    |                                                                                                                                                                                                                                                |                     |   |                                                                                                                                                                                                                                                                                                                                                                                                                                                                                                                                                                                                                                                                      |                                                                         |   |                                                                                                                                                                                                                                                                                                                                                            |   |      |      |    |    |    |    |    |             |   |   |   |   |   |             |   |   |                                                                                                                              |  |  |                                                                                                                                                                                                                                                                                                                                                                                                                          |  |             |               |  |  |  |  |  |  |  |  |  |  |  |  |  |  |  |  |  |  |
| <b>6740 OS Other ARM?</b><br>No Yes<br>0 2                                                                                                                                                                                                                                                                                                                                                                                                                                                                                                                                                                                                                                                                                                                                                                                                                                                                                                                                                                                                                                                                  |               |       | <b>6790 OS Other Lesions?</b><br>No Yes<br>0 2                                 |          |                                                                                                                                   | <b>OS Other Lesions?</b><br><table border="1" style="width:100%; border-collapse: collapse;"> <thead> <tr> <th rowspan="2"></th> <th colspan="2">All Flds</th> <th colspan="2">Cent Pt</th> </tr> <tr> <th>Q</th> <th>Yes</th> <th>Q</th> <th>Yes</th> </tr> </thead> <tbody> <tr> <td>6840 Chorioret Scar</td> <td>1</td> <td>2</td> <td>1</td> <td>2</td> </tr> <tr> <td>6845 SWR Tension Lines</td> <td>1</td> <td>2</td> <td>1</td> <td>2</td> </tr> <tr> <td>6850 SWR Cello Reflex</td> <td>1</td> <td>2</td> <td>1</td> <td>2</td> </tr> <tr> <td>6855 Mac Hole</td> <td>-</td> <td>-</td> <td>1</td> <td>2</td> </tr> <tr> <td>6860 Histoplasmosis</td> <td>1</td> <td>2</td> <td>1</td> <td>2</td> </tr> <tr> <td>6865 Non-Diab ME</td> <td>1</td> <td>2</td> <td>1</td> <td>2</td> </tr> <tr> <td>6870 Ret Detach</td> <td>1</td> <td>2</td> <td>1</td> <td>2</td> </tr> <tr> <td>6875 Focal/(ME) PC</td> <td>1</td> <td>2</td> <td>--</td> <td>--</td> </tr> <tr> <td>6880 Scatter PC</td> <td>1</td> <td>2</td> <td>--</td> <td>--</td> </tr> <tr> <td>6885 Thick Vit/Gual</td> <td>1</td> <td>2</td> <td>1</td> <td>2</td> </tr> <tr> <td>6890 Other (comments)</td> <td>1</td> <td>2</td> <td>1</td> <td>2</td> </tr> </tbody> </table> |                                                                                                                                                                                                                                                                                                                                                                                                                              |      |                                                                                         |      |     |                         | All Flds |   | Cent Pt |              | Q                     | Yes | Q | Yes | 6840 Chorioret Scar | 1                     | 2            | 1   | 2   | 6845 SWR Tension Lines | 1           | 2   | 1                                                                                                                                | 2            | 6850 SWR Cello Reflex                                              | 1           | 2 | 1                                                                                                                                                                                | 2 | 6855 Mac Hole | -               | - | 1    | 2      | 6860 Histoplasmosis | 1                   | 2 | 1                              | 2  | 6865 Non-Diab ME | 1                                                                                                                                     | 2 | 1                                                                                                                                                                                                                                                                                                                                                                                           | 2 | 6870 Ret Detach | 1                     | 2  | 1  | 2 | 6875 Focal/(ME) PC | 1                                                                                                                                                                                                                                                                                                                                                  | 2            | -- | --                                                                                                                                                                                                                                                                                                                                                                                                                      | 6880 Scatter PC | 1 | 2 | -- | --                                                                                                                                                                                                                                             | 6885 Thick Vit/Gual | 1 | 2                                                                                                                                                                                                                                                                                                                                                                                                                                                                                                                                                                                                                                                                    | 1                                                                       | 2 | 6890 Other (comments)                                                                                                                                                                                                                                                                                                                                      | 1 | 2    | 1    | 2  |    |    |    |    |             |   |   |   |   |   |             |   |   |                                                                                                                              |  |  |                                                                                                                                                                                                                                                                                                                                                                                                                          |  |             |               |  |  |  |  |  |  |  |  |  |  |  |  |  |  |  |  |  |  |
|                                                                                                                                                                                                                                                                                                                                                                                                                                                                                                                                                                                                                                                                                                                                                                                                                                                                                                                                                                                                                                                                                                             | All Flds      |       | Cent Pt                                                                        |          |                                                                                                                                   |                                                                                                                                                                                                                                                                                                                                                                                                                                                                                                                                                                                                                                                                                                                                                                                                                                                                                                                                                                                                                                                                                                                                                                                                                                                      |                                                                                                                                                                                                                                                                                                                                                                                                                              |      |                                                                                         |      |     |                         |          |   |         |              |                       |     |   |     |                     |                       |              |     |     |                        |             |     |                                                                                                                                  |              |                                                                    |             |   |                                                                                                                                                                                  |   |               |                 |   |      |        |                     |                     |   |                                |    |                  |                                                                                                                                       |   |                                                                                                                                                                                                                                                                                                                                                                                             |   |                 |                       |    |    |   |                    |                                                                                                                                                                                                                                                                                                                                                    |              |    |                                                                                                                                                                                                                                                                                                                                                                                                                         |                 |   |   |    |                                                                                                                                                                                                                                                |                     |   |                                                                                                                                                                                                                                                                                                                                                                                                                                                                                                                                                                                                                                                                      |                                                                         |   |                                                                                                                                                                                                                                                                                                                                                            |   |      |      |    |    |    |    |    |             |   |   |   |   |   |             |   |   |                                                                                                                              |  |  |                                                                                                                                                                                                                                                                                                                                                                                                                          |  |             |               |  |  |  |  |  |  |  |  |  |  |  |  |  |  |  |  |  |  |
|                                                                                                                                                                                                                                                                                                                                                                                                                                                                                                                                                                                                                                                                                                                                                                                                                                                                                                                                                                                                                                                                                                             | Q             | Yes   | Q                                                                              | Yes      |                                                                                                                                   |                                                                                                                                                                                                                                                                                                                                                                                                                                                                                                                                                                                                                                                                                                                                                                                                                                                                                                                                                                                                                                                                                                                                                                                                                                                      |                                                                                                                                                                                                                                                                                                                                                                                                                              |      |                                                                                         |      |     |                         |          |   |         |              |                       |     |   |     |                     |                       |              |     |     |                        |             |     |                                                                                                                                  |              |                                                                    |             |   |                                                                                                                                                                                  |   |               |                 |   |      |        |                     |                     |   |                                |    |                  |                                                                                                                                       |   |                                                                                                                                                                                                                                                                                                                                                                                             |   |                 |                       |    |    |   |                    |                                                                                                                                                                                                                                                                                                                                                    |              |    |                                                                                                                                                                                                                                                                                                                                                                                                                         |                 |   |   |    |                                                                                                                                                                                                                                                |                     |   |                                                                                                                                                                                                                                                                                                                                                                                                                                                                                                                                                                                                                                                                      |                                                                         |   |                                                                                                                                                                                                                                                                                                                                                            |   |      |      |    |    |    |    |    |             |   |   |   |   |   |             |   |   |                                                                                                                              |  |  |                                                                                                                                                                                                                                                                                                                                                                                                                          |  |             |               |  |  |  |  |  |  |  |  |  |  |  |  |  |  |  |  |  |  |
| 6840 Chorioret Scar                                                                                                                                                                                                                                                                                                                                                                                                                                                                                                                                                                                                                                                                                                                                                                                                                                                                                                                                                                                                                                                                                         | 1             | 2     | 1                                                                              | 2        |                                                                                                                                   |                                                                                                                                                                                                                                                                                                                                                                                                                                                                                                                                                                                                                                                                                                                                                                                                                                                                                                                                                                                                                                                                                                                                                                                                                                                      |                                                                                                                                                                                                                                                                                                                                                                                                                              |      |                                                                                         |      |     |                         |          |   |         |              |                       |     |   |     |                     |                       |              |     |     |                        |             |     |                                                                                                                                  |              |                                                                    |             |   |                                                                                                                                                                                  |   |               |                 |   |      |        |                     |                     |   |                                |    |                  |                                                                                                                                       |   |                                                                                                                                                                                                                                                                                                                                                                                             |   |                 |                       |    |    |   |                    |                                                                                                                                                                                                                                                                                                                                                    |              |    |                                                                                                                                                                                                                                                                                                                                                                                                                         |                 |   |   |    |                                                                                                                                                                                                                                                |                     |   |                                                                                                                                                                                                                                                                                                                                                                                                                                                                                                                                                                                                                                                                      |                                                                         |   |                                                                                                                                                                                                                                                                                                                                                            |   |      |      |    |    |    |    |    |             |   |   |   |   |   |             |   |   |                                                                                                                              |  |  |                                                                                                                                                                                                                                                                                                                                                                                                                          |  |             |               |  |  |  |  |  |  |  |  |  |  |  |  |  |  |  |  |  |  |
| 6845 SWR Tension Lines                                                                                                                                                                                                                                                                                                                                                                                                                                                                                                                                                                                                                                                                                                                                                                                                                                                                                                                                                                                                                                                                                      | 1             | 2     | 1                                                                              | 2        |                                                                                                                                   |                                                                                                                                                                                                                                                                                                                                                                                                                                                                                                                                                                                                                                                                                                                                                                                                                                                                                                                                                                                                                                                                                                                                                                                                                                                      |                                                                                                                                                                                                                                                                                                                                                                                                                              |      |                                                                                         |      |     |                         |          |   |         |              |                       |     |   |     |                     |                       |              |     |     |                        |             |     |                                                                                                                                  |              |                                                                    |             |   |                                                                                                                                                                                  |   |               |                 |   |      |        |                     |                     |   |                                |    |                  |                                                                                                                                       |   |                                                                                                                                                                                                                                                                                                                                                                                             |   |                 |                       |    |    |   |                    |                                                                                                                                                                                                                                                                                                                                                    |              |    |                                                                                                                                                                                                                                                                                                                                                                                                                         |                 |   |   |    |                                                                                                                                                                                                                                                |                     |   |                                                                                                                                                                                                                                                                                                                                                                                                                                                                                                                                                                                                                                                                      |                                                                         |   |                                                                                                                                                                                                                                                                                                                                                            |   |      |      |    |    |    |    |    |             |   |   |   |   |   |             |   |   |                                                                                                                              |  |  |                                                                                                                                                                                                                                                                                                                                                                                                                          |  |             |               |  |  |  |  |  |  |  |  |  |  |  |  |  |  |  |  |  |  |
| 6850 SWR Cello Reflex                                                                                                                                                                                                                                                                                                                                                                                                                                                                                                                                                                                                                                                                                                                                                                                                                                                                                                                                                                                                                                                                                       | 1             | 2     | 1                                                                              | 2        |                                                                                                                                   |                                                                                                                                                                                                                                                                                                                                                                                                                                                                                                                                                                                                                                                                                                                                                                                                                                                                                                                                                                                                                                                                                                                                                                                                                                                      |                                                                                                                                                                                                                                                                                                                                                                                                                              |      |                                                                                         |      |     |                         |          |   |         |              |                       |     |   |     |                     |                       |              |     |     |                        |             |     |                                                                                                                                  |              |                                                                    |             |   |                                                                                                                                                                                  |   |               |                 |   |      |        |                     |                     |   |                                |    |                  |                                                                                                                                       |   |                                                                                                                                                                                                                                                                                                                                                                                             |   |                 |                       |    |    |   |                    |                                                                                                                                                                                                                                                                                                                                                    |              |    |                                                                                                                                                                                                                                                                                                                                                                                                                         |                 |   |   |    |                                                                                                                                                                                                                                                |                     |   |                                                                                                                                                                                                                                                                                                                                                                                                                                                                                                                                                                                                                                                                      |                                                                         |   |                                                                                                                                                                                                                                                                                                                                                            |   |      |      |    |    |    |    |    |             |   |   |   |   |   |             |   |   |                                                                                                                              |  |  |                                                                                                                                                                                                                                                                                                                                                                                                                          |  |             |               |  |  |  |  |  |  |  |  |  |  |  |  |  |  |  |  |  |  |
| 6855 Mac Hole                                                                                                                                                                                                                                                                                                                                                                                                                                                                                                                                                                                                                                                                                                                                                                                                                                                                                                                                                                                                                                                                                               | -             | -     | 1                                                                              | 2        |                                                                                                                                   |                                                                                                                                                                                                                                                                                                                                                                                                                                                                                                                                                                                                                                                                                                                                                                                                                                                                                                                                                                                                                                                                                                                                                                                                                                                      |                                                                                                                                                                                                                                                                                                                                                                                                                              |      |                                                                                         |      |     |                         |          |   |         |              |                       |     |   |     |                     |                       |              |     |     |                        |             |     |                                                                                                                                  |              |                                                                    |             |   |                                                                                                                                                                                  |   |               |                 |   |      |        |                     |                     |   |                                |    |                  |                                                                                                                                       |   |                                                                                                                                                                                                                                                                                                                                                                                             |   |                 |                       |    |    |   |                    |                                                                                                                                                                                                                                                                                                                                                    |              |    |                                                                                                                                                                                                                                                                                                                                                                                                                         |                 |   |   |    |                                                                                                                                                                                                                                                |                     |   |                                                                                                                                                                                                                                                                                                                                                                                                                                                                                                                                                                                                                                                                      |                                                                         |   |                                                                                                                                                                                                                                                                                                                                                            |   |      |      |    |    |    |    |    |             |   |   |   |   |   |             |   |   |                                                                                                                              |  |  |                                                                                                                                                                                                                                                                                                                                                                                                                          |  |             |               |  |  |  |  |  |  |  |  |  |  |  |  |  |  |  |  |  |  |
| 6860 Histoplasmosis                                                                                                                                                                                                                                                                                                                                                                                                                                                                                                                                                                                                                                                                                                                                                                                                                                                                                                                                                                                                                                                                                         | 1             | 2     | 1                                                                              | 2        |                                                                                                                                   |                                                                                                                                                                                                                                                                                                                                                                                                                                                                                                                                                                                                                                                                                                                                                                                                                                                                                                                                                                                                                                                                                                                                                                                                                                                      |                                                                                                                                                                                                                                                                                                                                                                                                                              |      |                                                                                         |      |     |                         |          |   |         |              |                       |     |   |     |                     |                       |              |     |     |                        |             |     |                                                                                                                                  |              |                                                                    |             |   |                                                                                                                                                                                  |   |               |                 |   |      |        |                     |                     |   |                                |    |                  |                                                                                                                                       |   |                                                                                                                                                                                                                                                                                                                                                                                             |   |                 |                       |    |    |   |                    |                                                                                                                                                                                                                                                                                                                                                    |              |    |                                                                                                                                                                                                                                                                                                                                                                                                                         |                 |   |   |    |                                                                                                                                                                                                                                                |                     |   |                                                                                                                                                                                                                                                                                                                                                                                                                                                                                                                                                                                                                                                                      |                                                                         |   |                                                                                                                                                                                                                                                                                                                                                            |   |      |      |    |    |    |    |    |             |   |   |   |   |   |             |   |   |                                                                                                                              |  |  |                                                                                                                                                                                                                                                                                                                                                                                                                          |  |             |               |  |  |  |  |  |  |  |  |  |  |  |  |  |  |  |  |  |  |
| 6865 Non-Diab ME                                                                                                                                                                                                                                                                                                                                                                                                                                                                                                                                                                                                                                                                                                                                                                                                                                                                                                                                                                                                                                                                                            | 1             | 2     | 1                                                                              | 2        |                                                                                                                                   |                                                                                                                                                                                                                                                                                                                                                                                                                                                                                                                                                                                                                                                                                                                                                                                                                                                                                                                                                                                                                                                                                                                                                                                                                                                      |                                                                                                                                                                                                                                                                                                                                                                                                                              |      |                                                                                         |      |     |                         |          |   |         |              |                       |     |   |     |                     |                       |              |     |     |                        |             |     |                                                                                                                                  |              |                                                                    |             |   |                                                                                                                                                                                  |   |               |                 |   |      |        |                     |                     |   |                                |    |                  |                                                                                                                                       |   |                                                                                                                                                                                                                                                                                                                                                                                             |   |                 |                       |    |    |   |                    |                                                                                                                                                                                                                                                                                                                                                    |              |    |                                                                                                                                                                                                                                                                                                                                                                                                                         |                 |   |   |    |                                                                                                                                                                                                                                                |                     |   |                                                                                                                                                                                                                                                                                                                                                                                                                                                                                                                                                                                                                                                                      |                                                                         |   |                                                                                                                                                                                                                                                                                                                                                            |   |      |      |    |    |    |    |    |             |   |   |   |   |   |             |   |   |                                                                                                                              |  |  |                                                                                                                                                                                                                                                                                                                                                                                                                          |  |             |               |  |  |  |  |  |  |  |  |  |  |  |  |  |  |  |  |  |  |
| 6870 Ret Detach                                                                                                                                                                                                                                                                                                                                                                                                                                                                                                                                                                                                                                                                                                                                                                                                                                                                                                                                                                                                                                                                                             | 1             | 2     | 1                                                                              | 2        |                                                                                                                                   |                                                                                                                                                                                                                                                                                                                                                                                                                                                                                                                                                                                                                                                                                                                                                                                                                                                                                                                                                                                                                                                                                                                                                                                                                                                      |                                                                                                                                                                                                                                                                                                                                                                                                                              |      |                                                                                         |      |     |                         |          |   |         |              |                       |     |   |     |                     |                       |              |     |     |                        |             |     |                                                                                                                                  |              |                                                                    |             |   |                                                                                                                                                                                  |   |               |                 |   |      |        |                     |                     |   |                                |    |                  |                                                                                                                                       |   |                                                                                                                                                                                                                                                                                                                                                                                             |   |                 |                       |    |    |   |                    |                                                                                                                                                                                                                                                                                                                                                    |              |    |                                                                                                                                                                                                                                                                                                                                                                                                                         |                 |   |   |    |                                                                                                                                                                                                                                                |                     |   |                                                                                                                                                                                                                                                                                                                                                                                                                                                                                                                                                                                                                                                                      |                                                                         |   |                                                                                                                                                                                                                                                                                                                                                            |   |      |      |    |    |    |    |    |             |   |   |   |   |   |             |   |   |                                                                                                                              |  |  |                                                                                                                                                                                                                                                                                                                                                                                                                          |  |             |               |  |  |  |  |  |  |  |  |  |  |  |  |  |  |  |  |  |  |
| 6875 Focal/(ME) PC                                                                                                                                                                                                                                                                                                                                                                                                                                                                                                                                                                                                                                                                                                                                                                                                                                                                                                                                                                                                                                                                                          | 1             | 2     | --                                                                             | --       |                                                                                                                                   |                                                                                                                                                                                                                                                                                                                                                                                                                                                                                                                                                                                                                                                                                                                                                                                                                                                                                                                                                                                                                                                                                                                                                                                                                                                      |                                                                                                                                                                                                                                                                                                                                                                                                                              |      |                                                                                         |      |     |                         |          |   |         |              |                       |     |   |     |                     |                       |              |     |     |                        |             |     |                                                                                                                                  |              |                                                                    |             |   |                                                                                                                                                                                  |   |               |                 |   |      |        |                     |                     |   |                                |    |                  |                                                                                                                                       |   |                                                                                                                                                                                                                                                                                                                                                                                             |   |                 |                       |    |    |   |                    |                                                                                                                                                                                                                                                                                                                                                    |              |    |                                                                                                                                                                                                                                                                                                                                                                                                                         |                 |   |   |    |                                                                                                                                                                                                                                                |                     |   |                                                                                                                                                                                                                                                                                                                                                                                                                                                                                                                                                                                                                                                                      |                                                                         |   |                                                                                                                                                                                                                                                                                                                                                            |   |      |      |    |    |    |    |    |             |   |   |   |   |   |             |   |   |                                                                                                                              |  |  |                                                                                                                                                                                                                                                                                                                                                                                                                          |  |             |               |  |  |  |  |  |  |  |  |  |  |  |  |  |  |  |  |  |  |
| 6880 Scatter PC                                                                                                                                                                                                                                                                                                                                                                                                                                                                                                                                                                                                                                                                                                                                                                                                                                                                                                                                                                                                                                                                                             | 1             | 2     | --                                                                             | --       |                                                                                                                                   |                                                                                                                                                                                                                                                                                                                                                                                                                                                                                                                                                                                                                                                                                                                                                                                                                                                                                                                                                                                                                                                                                                                                                                                                                                                      |                                                                                                                                                                                                                                                                                                                                                                                                                              |      |                                                                                         |      |     |                         |          |   |         |              |                       |     |   |     |                     |                       |              |     |     |                        |             |     |                                                                                                                                  |              |                                                                    |             |   |                                                                                                                                                                                  |   |               |                 |   |      |        |                     |                     |   |                                |    |                  |                                                                                                                                       |   |                                                                                                                                                                                                                                                                                                                                                                                             |   |                 |                       |    |    |   |                    |                                                                                                                                                                                                                                                                                                                                                    |              |    |                                                                                                                                                                                                                                                                                                                                                                                                                         |                 |   |   |    |                                                                                                                                                                                                                                                |                     |   |                                                                                                                                                                                                                                                                                                                                                                                                                                                                                                                                                                                                                                                                      |                                                                         |   |                                                                                                                                                                                                                                                                                                                                                            |   |      |      |    |    |    |    |    |             |   |   |   |   |   |             |   |   |                                                                                                                              |  |  |                                                                                                                                                                                                                                                                                                                                                                                                                          |  |             |               |  |  |  |  |  |  |  |  |  |  |  |  |  |  |  |  |  |  |
| 6885 Thick Vit/Gual                                                                                                                                                                                                                                                                                                                                                                                                                                                                                                                                                                                                                                                                                                                                                                                                                                                                                                                                                                                                                                                                                         | 1             | 2     | 1                                                                              | 2        |                                                                                                                                   |                                                                                                                                                                                                                                                                                                                                                                                                                                                                                                                                                                                                                                                                                                                                                                                                                                                                                                                                                                                                                                                                                                                                                                                                                                                      |                                                                                                                                                                                                                                                                                                                                                                                                                              |      |                                                                                         |      |     |                         |          |   |         |              |                       |     |   |     |                     |                       |              |     |     |                        |             |     |                                                                                                                                  |              |                                                                    |             |   |                                                                                                                                                                                  |   |               |                 |   |      |        |                     |                     |   |                                |    |                  |                                                                                                                                       |   |                                                                                                                                                                                                                                                                                                                                                                                             |   |                 |                       |    |    |   |                    |                                                                                                                                                                                                                                                                                                                                                    |              |    |                                                                                                                                                                                                                                                                                                                                                                                                                         |                 |   |   |    |                                                                                                                                                                                                                                                |                     |   |                                                                                                                                                                                                                                                                                                                                                                                                                                                                                                                                                                                                                                                                      |                                                                         |   |                                                                                                                                                                                                                                                                                                                                                            |   |      |      |    |    |    |    |    |             |   |   |   |   |   |             |   |   |                                                                                                                              |  |  |                                                                                                                                                                                                                                                                                                                                                                                                                          |  |             |               |  |  |  |  |  |  |  |  |  |  |  |  |  |  |  |  |  |  |
| 6890 Other (comments)                                                                                                                                                                                                                                                                                                                                                                                                                                                                                                                                                                                                                                                                                                                                                                                                                                                                                                                                                                                                                                                                                       | 1             | 2     | 1                                                                              | 2        |                                                                                                                                   |                                                                                                                                                                                                                                                                                                                                                                                                                                                                                                                                                                                                                                                                                                                                                                                                                                                                                                                                                                                                                                                                                                                                                                                                                                                      |                                                                                                                                                                                                                                                                                                                                                                                                                              |      |                                                                                         |      |     |                         |          |   |         |              |                       |     |   |     |                     |                       |              |     |     |                        |             |     |                                                                                                                                  |              |                                                                    |             |   |                                                                                                                                                                                  |   |               |                 |   |      |        |                     |                     |   |                                |    |                  |                                                                                                                                       |   |                                                                                                                                                                                                                                                                                                                                                                                             |   |                 |                       |    |    |   |                    |                                                                                                                                                                                                                                                                                                                                                    |              |    |                                                                                                                                                                                                                                                                                                                                                                                                                         |                 |   |   |    |                                                                                                                                                                                                                                                |                     |   |                                                                                                                                                                                                                                                                                                                                                                                                                                                                                                                                                                                                                                                                      |                                                                         |   |                                                                                                                                                                                                                                                                                                                                                            |   |      |      |    |    |    |    |    |             |   |   |   |   |   |             |   |   |                                                                                                                              |  |  |                                                                                                                                                                                                                                                                                                                                                                                                                          |  |             |               |  |  |  |  |  |  |  |  |  |  |  |  |  |  |  |  |  |  |
| <b>MAC DEGEN</b><br><table border="1" style="width:100%; border-collapse: collapse;"> <thead> <tr> <th rowspan="2"></th> <th colspan="2">All Flds</th> <th colspan="2">Cent Pt</th> </tr> <tr> <th>Q</th> <th>Yes</th> <th>Q</th> <th>Yes</th> </tr> </thead> <tbody> <tr> <td>6741 Pseudo Temp Drusen</td> <td>1</td> <td>2</td> <td>-</td> <td>-</td> </tr> <tr> <td>6745 Reticular Drusen</td> <td>1</td> <td>2</td> <td>1</td> <td>2</td> </tr> <tr> <td>6750 Calcified Drusen</td> <td>1</td> <td>2</td> <td>1</td> <td>2</td> </tr> <tr> <td>6755 ARM Rx</td> <td>1</td> <td>2</td> <td>1</td> <td>2</td> </tr> <tr> <td>6760 PED/RD</td> <td>1</td> <td>2</td> <td>1</td> <td>2</td> </tr> <tr> <td>6765 Subret Hem</td> <td>1</td> <td>2</td> <td>1</td> <td>2</td> </tr> <tr> <td>6770 Disciform Scar</td> <td>1</td> <td>2</td> <td>1</td> <td>2</td> </tr> <tr> <td>6775 Geog Atrophy</td> <td>1</td> <td>2</td> <td>1</td> <td>2</td> </tr> <tr> <td>6780 Other (comments)</td> <td>1</td> <td>2</td> <td>1</td> <td>2</td> </tr> </tbody> </table>                                             |               |       |                                                                                | All Flds |                                                                                                                                   | Cent Pt                                                                                                                                                                                                                                                                                                                                                                                                                                                                                                                                                                                                                                                                                                                                                                                                                                                                                                                                                                                                                                                                                                                                                                                                                                              |                                                                                                                                                                                                                                                                                                                                                                                                                              | Q    | Yes                                                                                     | Q    | Yes | 6741 Pseudo Temp Drusen | 1        | 2 | -       | -            | 6745 Reticular Drusen | 1   | 2 | 1   | 2                   | 6750 Calcified Drusen | 1            | 2   | 1   | 2                      | 6755 ARM Rx | 1   | 2                                                                                                                                | 1            | 2                                                                  | 6760 PED/RD | 1 | 2                                                                                                                                                                                | 1 | 2             | 6765 Subret Hem | 1 | 2    | 1      | 2                   | 6770 Disciform Scar | 1 | 2                              | 1  | 2                | 6775 Geog Atrophy                                                                                                                     | 1 | 2                                                                                                                                                                                                                                                                                                                                                                                           | 1 | 2               | 6780 Other (comments) | 1  | 2  | 1 | 2                  | <b>6795 Peripap Atrophy</b><br>1 2 -- --<br><b>6800 Art Sheathing</b> 1 2 -- --<br><b>6805 Cen Art Occlus</b> 1 2 1 2<br><b>6810 Br Art Occlus</b> 1 2 1 2<br><b>6815 Cen Vein Occlus</b> 1 2 1 2<br><b>6820 Br Vein Occlus</b> 1 2 1 2<br><b>6825 Hollen. Plaque*</b> 1 2 -- --<br><b>6830 Ast. Hyalosis</b> 1 2 1 2<br><b>6835 Nevus</b> 1 2 1 2 |              |    | <b>6840 Chorioret Scar</b> 1 2 1 2<br><b>6845 SWR Tension Lines</b> 1 2 1 2<br><b>6850 SWR Cello Reflex</b> 1 2 1 2<br><b>6855 Mac Hole</b> - - 1 2<br><b>6860 Histoplasmosis</b> 1 2 1 2<br><b>6865 Non-Diab ME</b> 1 2 1 2<br><b>6870 Ret Detach</b> 1 2 1 2<br><b>6875 Focal/(ME) PC</b> 1 2 -- --<br><b>6880 Scatter PC</b> 1 2 -- --<br><b>6885 Thick Vit/Gual</b> 1 2 1 2<br><b>6890 Other (comments)</b> 1 2 1 2 |                 |   |   |    |                                                                                                                                                                                                                                                |                     |   |                                                                                                                                                                                                                                                                                                                                                                                                                                                                                                                                                                                                                                                                      |                                                                         |   |                                                                                                                                                                                                                                                                                                                                                            |   |      |      |    |    |    |    |    |             |   |   |   |   |   |             |   |   |                                                                                                                              |  |  |                                                                                                                                                                                                                                                                                                                                                                                                                          |  |             |               |  |  |  |  |  |  |  |  |  |  |  |  |  |  |  |  |  |  |
|                                                                                                                                                                                                                                                                                                                                                                                                                                                                                                                                                                                                                                                                                                                                                                                                                                                                                                                                                                                                                                                                                                             | All Flds      |       |                                                                                | Cent Pt  |                                                                                                                                   |                                                                                                                                                                                                                                                                                                                                                                                                                                                                                                                                                                                                                                                                                                                                                                                                                                                                                                                                                                                                                                                                                                                                                                                                                                                      |                                                                                                                                                                                                                                                                                                                                                                                                                              |      |                                                                                         |      |     |                         |          |   |         |              |                       |     |   |     |                     |                       |              |     |     |                        |             |     |                                                                                                                                  |              |                                                                    |             |   |                                                                                                                                                                                  |   |               |                 |   |      |        |                     |                     |   |                                |    |                  |                                                                                                                                       |   |                                                                                                                                                                                                                                                                                                                                                                                             |   |                 |                       |    |    |   |                    |                                                                                                                                                                                                                                                                                                                                                    |              |    |                                                                                                                                                                                                                                                                                                                                                                                                                         |                 |   |   |    |                                                                                                                                                                                                                                                |                     |   |                                                                                                                                                                                                                                                                                                                                                                                                                                                                                                                                                                                                                                                                      |                                                                         |   |                                                                                                                                                                                                                                                                                                                                                            |   |      |      |    |    |    |    |    |             |   |   |   |   |   |             |   |   |                                                                                                                              |  |  |                                                                                                                                                                                                                                                                                                                                                                                                                          |  |             |               |  |  |  |  |  |  |  |  |  |  |  |  |  |  |  |  |  |  |
|                                                                                                                                                                                                                                                                                                                                                                                                                                                                                                                                                                                                                                                                                                                                                                                                                                                                                                                                                                                                                                                                                                             | Q             | Yes   | Q                                                                              | Yes      |                                                                                                                                   |                                                                                                                                                                                                                                                                                                                                                                                                                                                                                                                                                                                                                                                                                                                                                                                                                                                                                                                                                                                                                                                                                                                                                                                                                                                      |                                                                                                                                                                                                                                                                                                                                                                                                                              |      |                                                                                         |      |     |                         |          |   |         |              |                       |     |   |     |                     |                       |              |     |     |                        |             |     |                                                                                                                                  |              |                                                                    |             |   |                                                                                                                                                                                  |   |               |                 |   |      |        |                     |                     |   |                                |    |                  |                                                                                                                                       |   |                                                                                                                                                                                                                                                                                                                                                                                             |   |                 |                       |    |    |   |                    |                                                                                                                                                                                                                                                                                                                                                    |              |    |                                                                                                                                                                                                                                                                                                                                                                                                                         |                 |   |   |    |                                                                                                                                                                                                                                                |                     |   |                                                                                                                                                                                                                                                                                                                                                                                                                                                                                                                                                                                                                                                                      |                                                                         |   |                                                                                                                                                                                                                                                                                                                                                            |   |      |      |    |    |    |    |    |             |   |   |   |   |   |             |   |   |                                                                                                                              |  |  |                                                                                                                                                                                                                                                                                                                                                                                                                          |  |             |               |  |  |  |  |  |  |  |  |  |  |  |  |  |  |  |  |  |  |
| 6741 Pseudo Temp Drusen                                                                                                                                                                                                                                                                                                                                                                                                                                                                                                                                                                                                                                                                                                                                                                                                                                                                                                                                                                                                                                                                                     | 1             | 2     | -                                                                              | -        |                                                                                                                                   |                                                                                                                                                                                                                                                                                                                                                                                                                                                                                                                                                                                                                                                                                                                                                                                                                                                                                                                                                                                                                                                                                                                                                                                                                                                      |                                                                                                                                                                                                                                                                                                                                                                                                                              |      |                                                                                         |      |     |                         |          |   |         |              |                       |     |   |     |                     |                       |              |     |     |                        |             |     |                                                                                                                                  |              |                                                                    |             |   |                                                                                                                                                                                  |   |               |                 |   |      |        |                     |                     |   |                                |    |                  |                                                                                                                                       |   |                                                                                                                                                                                                                                                                                                                                                                                             |   |                 |                       |    |    |   |                    |                                                                                                                                                                                                                                                                                                                                                    |              |    |                                                                                                                                                                                                                                                                                                                                                                                                                         |                 |   |   |    |                                                                                                                                                                                                                                                |                     |   |                                                                                                                                                                                                                                                                                                                                                                                                                                                                                                                                                                                                                                                                      |                                                                         |   |                                                                                                                                                                                                                                                                                                                                                            |   |      |      |    |    |    |    |    |             |   |   |   |   |   |             |   |   |                                                                                                                              |  |  |                                                                                                                                                                                                                                                                                                                                                                                                                          |  |             |               |  |  |  |  |  |  |  |  |  |  |  |  |  |  |  |  |  |  |
| 6745 Reticular Drusen                                                                                                                                                                                                                                                                                                                                                                                                                                                                                                                                                                                                                                                                                                                                                                                                                                                                                                                                                                                                                                                                                       | 1             | 2     | 1                                                                              | 2        |                                                                                                                                   |                                                                                                                                                                                                                                                                                                                                                                                                                                                                                                                                                                                                                                                                                                                                                                                                                                                                                                                                                                                                                                                                                                                                                                                                                                                      |                                                                                                                                                                                                                                                                                                                                                                                                                              |      |                                                                                         |      |     |                         |          |   |         |              |                       |     |   |     |                     |                       |              |     |     |                        |             |     |                                                                                                                                  |              |                                                                    |             |   |                                                                                                                                                                                  |   |               |                 |   |      |        |                     |                     |   |                                |    |                  |                                                                                                                                       |   |                                                                                                                                                                                                                                                                                                                                                                                             |   |                 |                       |    |    |   |                    |                                                                                                                                                                                                                                                                                                                                                    |              |    |                                                                                                                                                                                                                                                                                                                                                                                                                         |                 |   |   |    |                                                                                                                                                                                                                                                |                     |   |                                                                                                                                                                                                                                                                                                                                                                                                                                                                                                                                                                                                                                                                      |                                                                         |   |                                                                                                                                                                                                                                                                                                                                                            |   |      |      |    |    |    |    |    |             |   |   |   |   |   |             |   |   |                                                                                                                              |  |  |                                                                                                                                                                                                                                                                                                                                                                                                                          |  |             |               |  |  |  |  |  |  |  |  |  |  |  |  |  |  |  |  |  |  |
| 6750 Calcified Drusen                                                                                                                                                                                                                                                                                                                                                                                                                                                                                                                                                                                                                                                                                                                                                                                                                                                                                                                                                                                                                                                                                       | 1             | 2     | 1                                                                              | 2        |                                                                                                                                   |                                                                                                                                                                                                                                                                                                                                                                                                                                                                                                                                                                                                                                                                                                                                                                                                                                                                                                                                                                                                                                                                                                                                                                                                                                                      |                                                                                                                                                                                                                                                                                                                                                                                                                              |      |                                                                                         |      |     |                         |          |   |         |              |                       |     |   |     |                     |                       |              |     |     |                        |             |     |                                                                                                                                  |              |                                                                    |             |   |                                                                                                                                                                                  |   |               |                 |   |      |        |                     |                     |   |                                |    |                  |                                                                                                                                       |   |                                                                                                                                                                                                                                                                                                                                                                                             |   |                 |                       |    |    |   |                    |                                                                                                                                                                                                                                                                                                                                                    |              |    |                                                                                                                                                                                                                                                                                                                                                                                                                         |                 |   |   |    |                                                                                                                                                                                                                                                |                     |   |                                                                                                                                                                                                                                                                                                                                                                                                                                                                                                                                                                                                                                                                      |                                                                         |   |                                                                                                                                                                                                                                                                                                                                                            |   |      |      |    |    |    |    |    |             |   |   |   |   |   |             |   |   |                                                                                                                              |  |  |                                                                                                                                                                                                                                                                                                                                                                                                                          |  |             |               |  |  |  |  |  |  |  |  |  |  |  |  |  |  |  |  |  |  |
| 6755 ARM Rx                                                                                                                                                                                                                                                                                                                                                                                                                                                                                                                                                                                                                                                                                                                                                                                                                                                                                                                                                                                                                                                                                                 | 1             | 2     | 1                                                                              | 2        |                                                                                                                                   |                                                                                                                                                                                                                                                                                                                                                                                                                                                                                                                                                                                                                                                                                                                                                                                                                                                                                                                                                                                                                                                                                                                                                                                                                                                      |                                                                                                                                                                                                                                                                                                                                                                                                                              |      |                                                                                         |      |     |                         |          |   |         |              |                       |     |   |     |                     |                       |              |     |     |                        |             |     |                                                                                                                                  |              |                                                                    |             |   |                                                                                                                                                                                  |   |               |                 |   |      |        |                     |                     |   |                                |    |                  |                                                                                                                                       |   |                                                                                                                                                                                                                                                                                                                                                                                             |   |                 |                       |    |    |   |                    |                                                                                                                                                                                                                                                                                                                                                    |              |    |                                                                                                                                                                                                                                                                                                                                                                                                                         |                 |   |   |    |                                                                                                                                                                                                                                                |                     |   |                                                                                                                                                                                                                                                                                                                                                                                                                                                                                                                                                                                                                                                                      |                                                                         |   |                                                                                                                                                                                                                                                                                                                                                            |   |      |      |    |    |    |    |    |             |   |   |   |   |   |             |   |   |                                                                                                                              |  |  |                                                                                                                                                                                                                                                                                                                                                                                                                          |  |             |               |  |  |  |  |  |  |  |  |  |  |  |  |  |  |  |  |  |  |
| 6760 PED/RD                                                                                                                                                                                                                                                                                                                                                                                                                                                                                                                                                                                                                                                                                                                                                                                                                                                                                                                                                                                                                                                                                                 | 1             | 2     | 1                                                                              | 2        |                                                                                                                                   |                                                                                                                                                                                                                                                                                                                                                                                                                                                                                                                                                                                                                                                                                                                                                                                                                                                                                                                                                                                                                                                                                                                                                                                                                                                      |                                                                                                                                                                                                                                                                                                                                                                                                                              |      |                                                                                         |      |     |                         |          |   |         |              |                       |     |   |     |                     |                       |              |     |     |                        |             |     |                                                                                                                                  |              |                                                                    |             |   |                                                                                                                                                                                  |   |               |                 |   |      |        |                     |                     |   |                                |    |                  |                                                                                                                                       |   |                                                                                                                                                                                                                                                                                                                                                                                             |   |                 |                       |    |    |   |                    |                                                                                                                                                                                                                                                                                                                                                    |              |    |                                                                                                                                                                                                                                                                                                                                                                                                                         |                 |   |   |    |                                                                                                                                                                                                                                                |                     |   |                                                                                                                                                                                                                                                                                                                                                                                                                                                                                                                                                                                                                                                                      |                                                                         |   |                                                                                                                                                                                                                                                                                                                                                            |   |      |      |    |    |    |    |    |             |   |   |   |   |   |             |   |   |                                                                                                                              |  |  |                                                                                                                                                                                                                                                                                                                                                                                                                          |  |             |               |  |  |  |  |  |  |  |  |  |  |  |  |  |  |  |  |  |  |
| 6765 Subret Hem                                                                                                                                                                                                                                                                                                                                                                                                                                                                                                                                                                                                                                                                                                                                                                                                                                                                                                                                                                                                                                                                                             | 1             | 2     | 1                                                                              | 2        |                                                                                                                                   |                                                                                                                                                                                                                                                                                                                                                                                                                                                                                                                                                                                                                                                                                                                                                                                                                                                                                                                                                                                                                                                                                                                                                                                                                                                      |                                                                                                                                                                                                                                                                                                                                                                                                                              |      |                                                                                         |      |     |                         |          |   |         |              |                       |     |   |     |                     |                       |              |     |     |                        |             |     |                                                                                                                                  |              |                                                                    |             |   |                                                                                                                                                                                  |   |               |                 |   |      |        |                     |                     |   |                                |    |                  |                                                                                                                                       |   |                                                                                                                                                                                                                                                                                                                                                                                             |   |                 |                       |    |    |   |                    |                                                                                                                                                                                                                                                                                                                                                    |              |    |                                                                                                                                                                                                                                                                                                                                                                                                                         |                 |   |   |    |                                                                                                                                                                                                                                                |                     |   |                                                                                                                                                                                                                                                                                                                                                                                                                                                                                                                                                                                                                                                                      |                                                                         |   |                                                                                                                                                                                                                                                                                                                                                            |   |      |      |    |    |    |    |    |             |   |   |   |   |   |             |   |   |                                                                                                                              |  |  |                                                                                                                                                                                                                                                                                                                                                                                                                          |  |             |               |  |  |  |  |  |  |  |  |  |  |  |  |  |  |  |  |  |  |
| 6770 Disciform Scar                                                                                                                                                                                                                                                                                                                                                                                                                                                                                                                                                                                                                                                                                                                                                                                                                                                                                                                                                                                                                                                                                         | 1             | 2     | 1                                                                              | 2        |                                                                                                                                   |                                                                                                                                                                                                                                                                                                                                                                                                                                                                                                                                                                                                                                                                                                                                                                                                                                                                                                                                                                                                                                                                                                                                                                                                                                                      |                                                                                                                                                                                                                                                                                                                                                                                                                              |      |                                                                                         |      |     |                         |          |   |         |              |                       |     |   |     |                     |                       |              |     |     |                        |             |     |                                                                                                                                  |              |                                                                    |             |   |                                                                                                                                                                                  |   |               |                 |   |      |        |                     |                     |   |                                |    |                  |                                                                                                                                       |   |                                                                                                                                                                                                                                                                                                                                                                                             |   |                 |                       |    |    |   |                    |                                                                                                                                                                                                                                                                                                                                                    |              |    |                                                                                                                                                                                                                                                                                                                                                                                                                         |                 |   |   |    |                                                                                                                                                                                                                                                |                     |   |                                                                                                                                                                                                                                                                                                                                                                                                                                                                                                                                                                                                                                                                      |                                                                         |   |                                                                                                                                                                                                                                                                                                                                                            |   |      |      |    |    |    |    |    |             |   |   |   |   |   |             |   |   |                                                                                                                              |  |  |                                                                                                                                                                                                                                                                                                                                                                                                                          |  |             |               |  |  |  |  |  |  |  |  |  |  |  |  |  |  |  |  |  |  |
| 6775 Geog Atrophy                                                                                                                                                                                                                                                                                                                                                                                                                                                                                                                                                                                                                                                                                                                                                                                                                                                                                                                                                                                                                                                                                           | 1             | 2     | 1                                                                              | 2        |                                                                                                                                   |                                                                                                                                                                                                                                                                                                                                                                                                                                                                                                                                                                                                                                                                                                                                                                                                                                                                                                                                                                                                                                                                                                                                                                                                                                                      |                                                                                                                                                                                                                                                                                                                                                                                                                              |      |                                                                                         |      |     |                         |          |   |         |              |                       |     |   |     |                     |                       |              |     |     |                        |             |     |                                                                                                                                  |              |                                                                    |             |   |                                                                                                                                                                                  |   |               |                 |   |      |        |                     |                     |   |                                |    |                  |                                                                                                                                       |   |                                                                                                                                                                                                                                                                                                                                                                                             |   |                 |                       |    |    |   |                    |                                                                                                                                                                                                                                                                                                                                                    |              |    |                                                                                                                                                                                                                                                                                                                                                                                                                         |                 |   |   |    |                                                                                                                                                                                                                                                |                     |   |                                                                                                                                                                                                                                                                                                                                                                                                                                                                                                                                                                                                                                                                      |                                                                         |   |                                                                                                                                                                                                                                                                                                                                                            |   |      |      |    |    |    |    |    |             |   |   |   |   |   |             |   |   |                                                                                                                              |  |  |                                                                                                                                                                                                                                                                                                                                                                                                                          |  |             |               |  |  |  |  |  |  |  |  |  |  |  |  |  |  |  |  |  |  |
| 6780 Other (comments)                                                                                                                                                                                                                                                                                                                                                                                                                                                                                                                                                                                                                                                                                                                                                                                                                                                                                                                                                                                                                                                                                       | 1             | 2     | 1                                                                              | 2        |                                                                                                                                   |                                                                                                                                                                                                                                                                                                                                                                                                                                                                                                                                                                                                                                                                                                                                                                                                                                                                                                                                                                                                                                                                                                                                                                                                                                                      |                                                                                                                                                                                                                                                                                                                                                                                                                              |      |                                                                                         |      |     |                         |          |   |         |              |                       |     |   |     |                     |                       |              |     |     |                        |             |     |                                                                                                                                  |              |                                                                    |             |   |                                                                                                                                                                                  |   |               |                 |   |      |        |                     |                     |   |                                |    |                  |                                                                                                                                       |   |                                                                                                                                                                                                                                                                                                                                                                                             |   |                 |                       |    |    |   |                    |                                                                                                                                                                                                                                                                                                                                                    |              |    |                                                                                                                                                                                                                                                                                                                                                                                                                         |                 |   |   |    |                                                                                                                                                                                                                                                |                     |   |                                                                                                                                                                                                                                                                                                                                                                                                                                                                                                                                                                                                                                                                      |                                                                         |   |                                                                                                                                                                                                                                                                                                                                                            |   |      |      |    |    |    |    |    |             |   |   |   |   |   |             |   |   |                                                                                                                              |  |  |                                                                                                                                                                                                                                                                                                                                                                                                                          |  |             |               |  |  |  |  |  |  |  |  |  |  |  |  |  |  |  |  |  |  |
| <b>OS LENS PHOTO QUALITY</b><br><b>6900 LENS STATUS</b><br>No Lens 0<br>IOL 1<br>Lens Present 2<br>CG 8<br>NA - No Pix 9<br><table border="1" style="width:100%; border-collapse: collapse;"> <thead> <tr> <th rowspan="2"></th> <th colspan="3">OS</th> <th colspan="3">GRADABLE</th> </tr> <tr> <th>Ab</th> <th>Pr</th> <th>Dig</th> <th>N</th> <th>Y</th> <th>G/F</th> </tr> </thead> <tbody> <tr> <td>6905 SI/Lamp</td> <td>0</td> <td>2</td> <td></td> <td>0</td> <td>1</td> <td>2</td> </tr> <tr> <td>6915 Focus</td> <td>Cor</td> <td>Ant</td> <td></td> <td>Nuc</td> <td>Pos</td> <td>CG</td> </tr> <tr> <td></td> <td>0</td> <td>1</td> <td></td> <td>2</td> <td>3</td> <td>8</td> </tr> <tr> <td></td> <td></td> <td></td> <td></td> <td>B/P</td> <td>G/F</td> <td></td> </tr> <tr> <td></td> <td>Ab</td> <td>Pr</td> <td>Dig</td> <td>N</td> <td>Y</td> <td>Y</td> </tr> <tr> <td>6920 Neitz/A</td> <td>0</td> <td>2</td> <td>3</td> <td>0</td> <td>1</td> <td>2</td> </tr> <tr> <td>6930 Neitz/P</td> <td>0</td> <td>2</td> <td>3</td> <td>0</td> <td>1</td> <td>2</td> </tr> </tbody> </table> |               |       |                                                                                | OS       |                                                                                                                                   |                                                                                                                                                                                                                                                                                                                                                                                                                                                                                                                                                                                                                                                                                                                                                                                                                                                                                                                                                                                                                                                                                                                                                                                                                                                      | GRADABLE                                                                                                                                                                                                                                                                                                                                                                                                                     |      |                                                                                         | Ab   | Pr  | Dig                     | N        | Y | G/F     | 6905 SI/Lamp | 0                     | 2   |   | 0   | 1                   | 2                     | 6915 Focus   | Cor | Ant |                        | Nuc         | Pos | CG                                                                                                                               |              | 0                                                                  | 1           |   | 2                                                                                                                                                                                | 3 | 8             |                 |   |      |        | B/P                 | G/F                 |   |                                | Ab | Pr               | Dig                                                                                                                                   | N | Y                                                                                                                                                                                                                                                                                                                                                                                           | Y | 6920 Neitz/A    | 0                     | 2  | 3  | 0 | 1                  | 2                                                                                                                                                                                                                                                                                                                                                  | 6930 Neitz/P | 0  | 2                                                                                                                                                                                                                                                                                                                                                                                                                       | 3               | 0 | 1 | 2  | <b>OS SLIT LAMP</b><br><b>6940 NSC</b><br>≤ STD 1 1<br>≤ STD 2 2<br>≤ STD 3 3<br>≤ STD 4 4<br>> STD 4 5<br>CG 8<br><b>6944 SL-COLOR</b><br>< STD 3 0<br>≥ STD 3 1<br>CG 8<br><b>6946 CORT-FLECKS</b><br>None 0<br>Quest 1<br>Present 2<br>CG 8 |                     |   | <b>OS NEITZ</b><br><b>6948 Any Abnormalities Present?</b> No 0 Yes 2<br><table border="1" style="width:100%; border-collapse: collapse;"> <thead> <tr> <th></th> <th>Q1</th> <th>Q2</th> <th>Q3</th> <th>Q4</th> <th>CC</th> </tr> </thead> <tbody> <tr> <td>695__ CRT %</td> <td></td> <td></td> <td></td> <td></td> <td></td> </tr> <tr> <td>696__ PSC %</td> <td></td> <td></td> <td></td> <td></td> <td></td> </tr> <tr> <td>697__ VAC #</td> <td></td> <td></td> <td></td> <td></td> <td></td> </tr> </tbody> </table> <b>6980 WACO</b> NO 0 Q 1 WACO 2 TWACO+/- 3 CG 8<br><b>6982 MIT DOT</b> NO 0 Q 1 YES 2 CG 8<br><b>6984 PSEUDO-EX</b> NO 0 Q 1 YES 2 CG 8 |                                                                         |   |                                                                                                                                                                                                                                                                                                                                                            |   |      |      | Q1 | Q2 | Q3 | Q4 | CC | 695__ CRT % |   |   |   |   |   | 696__ PSC % |   |   |                                                                                                                              |  |  | 697__ VAC #                                                                                                                                                                                                                                                                                                                                                                                                              |  |             |               |  |  |  |  |  |  |  |  |  |  |  |  |  |  |  |  |  |  |
|                                                                                                                                                                                                                                                                                                                                                                                                                                                                                                                                                                                                                                                                                                                                                                                                                                                                                                                                                                                                                                                                                                             | OS            |       |                                                                                | GRADABLE |                                                                                                                                   |                                                                                                                                                                                                                                                                                                                                                                                                                                                                                                                                                                                                                                                                                                                                                                                                                                                                                                                                                                                                                                                                                                                                                                                                                                                      |                                                                                                                                                                                                                                                                                                                                                                                                                              |      |                                                                                         |      |     |                         |          |   |         |              |                       |     |   |     |                     |                       |              |     |     |                        |             |     |                                                                                                                                  |              |                                                                    |             |   |                                                                                                                                                                                  |   |               |                 |   |      |        |                     |                     |   |                                |    |                  |                                                                                                                                       |   |                                                                                                                                                                                                                                                                                                                                                                                             |   |                 |                       |    |    |   |                    |                                                                                                                                                                                                                                                                                                                                                    |              |    |                                                                                                                                                                                                                                                                                                                                                                                                                         |                 |   |   |    |                                                                                                                                                                                                                                                |                     |   |                                                                                                                                                                                                                                                                                                                                                                                                                                                                                                                                                                                                                                                                      |                                                                         |   |                                                                                                                                                                                                                                                                                                                                                            |   |      |      |    |    |    |    |    |             |   |   |   |   |   |             |   |   |                                                                                                                              |  |  |                                                                                                                                                                                                                                                                                                                                                                                                                          |  |             |               |  |  |  |  |  |  |  |  |  |  |  |  |  |  |  |  |  |  |
|                                                                                                                                                                                                                                                                                                                                                                                                                                                                                                                                                                                                                                                                                                                                                                                                                                                                                                                                                                                                                                                                                                             | Ab            | Pr    | Dig                                                                            | N        | Y                                                                                                                                 | G/F                                                                                                                                                                                                                                                                                                                                                                                                                                                                                                                                                                                                                                                                                                                                                                                                                                                                                                                                                                                                                                                                                                                                                                                                                                                  |                                                                                                                                                                                                                                                                                                                                                                                                                              |      |                                                                                         |      |     |                         |          |   |         |              |                       |     |   |     |                     |                       |              |     |     |                        |             |     |                                                                                                                                  |              |                                                                    |             |   |                                                                                                                                                                                  |   |               |                 |   |      |        |                     |                     |   |                                |    |                  |                                                                                                                                       |   |                                                                                                                                                                                                                                                                                                                                                                                             |   |                 |                       |    |    |   |                    |                                                                                                                                                                                                                                                                                                                                                    |              |    |                                                                                                                                                                                                                                                                                                                                                                                                                         |                 |   |   |    |                                                                                                                                                                                                                                                |                     |   |                                                                                                                                                                                                                                                                                                                                                                                                                                                                                                                                                                                                                                                                      |                                                                         |   |                                                                                                                                                                                                                                                                                                                                                            |   |      |      |    |    |    |    |    |             |   |   |   |   |   |             |   |   |                                                                                                                              |  |  |                                                                                                                                                                                                                                                                                                                                                                                                                          |  |             |               |  |  |  |  |  |  |  |  |  |  |  |  |  |  |  |  |  |  |
| 6905 SI/Lamp                                                                                                                                                                                                                                                                                                                                                                                                                                                                                                                                                                                                                                                                                                                                                                                                                                                                                                                                                                                                                                                                                                | 0             | 2     |                                                                                | 0        | 1                                                                                                                                 | 2                                                                                                                                                                                                                                                                                                                                                                                                                                                                                                                                                                                                                                                                                                                                                                                                                                                                                                                                                                                                                                                                                                                                                                                                                                                    |                                                                                                                                                                                                                                                                                                                                                                                                                              |      |                                                                                         |      |     |                         |          |   |         |              |                       |     |   |     |                     |                       |              |     |     |                        |             |     |                                                                                                                                  |              |                                                                    |             |   |                                                                                                                                                                                  |   |               |                 |   |      |        |                     |                     |   |                                |    |                  |                                                                                                                                       |   |                                                                                                                                                                                                                                                                                                                                                                                             |   |                 |                       |    |    |   |                    |                                                                                                                                                                                                                                                                                                                                                    |              |    |                                                                                                                                                                                                                                                                                                                                                                                                                         |                 |   |   |    |                                                                                                                                                                                                                                                |                     |   |                                                                                                                                                                                                                                                                                                                                                                                                                                                                                                                                                                                                                                                                      |                                                                         |   |                                                                                                                                                                                                                                                                                                                                                            |   |      |      |    |    |    |    |    |             |   |   |   |   |   |             |   |   |                                                                                                                              |  |  |                                                                                                                                                                                                                                                                                                                                                                                                                          |  |             |               |  |  |  |  |  |  |  |  |  |  |  |  |  |  |  |  |  |  |
| 6915 Focus                                                                                                                                                                                                                                                                                                                                                                                                                                                                                                                                                                                                                                                                                                                                                                                                                                                                                                                                                                                                                                                                                                  | Cor           | Ant   |                                                                                | Nuc      | Pos                                                                                                                               | CG                                                                                                                                                                                                                                                                                                                                                                                                                                                                                                                                                                                                                                                                                                                                                                                                                                                                                                                                                                                                                                                                                                                                                                                                                                                   |                                                                                                                                                                                                                                                                                                                                                                                                                              |      |                                                                                         |      |     |                         |          |   |         |              |                       |     |   |     |                     |                       |              |     |     |                        |             |     |                                                                                                                                  |              |                                                                    |             |   |                                                                                                                                                                                  |   |               |                 |   |      |        |                     |                     |   |                                |    |                  |                                                                                                                                       |   |                                                                                                                                                                                                                                                                                                                                                                                             |   |                 |                       |    |    |   |                    |                                                                                                                                                                                                                                                                                                                                                    |              |    |                                                                                                                                                                                                                                                                                                                                                                                                                         |                 |   |   |    |                                                                                                                                                                                                                                                |                     |   |                                                                                                                                                                                                                                                                                                                                                                                                                                                                                                                                                                                                                                                                      |                                                                         |   |                                                                                                                                                                                                                                                                                                                                                            |   |      |      |    |    |    |    |    |             |   |   |   |   |   |             |   |   |                                                                                                                              |  |  |                                                                                                                                                                                                                                                                                                                                                                                                                          |  |             |               |  |  |  |  |  |  |  |  |  |  |  |  |  |  |  |  |  |  |
|                                                                                                                                                                                                                                                                                                                                                                                                                                                                                                                                                                                                                                                                                                                                                                                                                                                                                                                                                                                                                                                                                                             | 0             | 1     |                                                                                | 2        | 3                                                                                                                                 | 8                                                                                                                                                                                                                                                                                                                                                                                                                                                                                                                                                                                                                                                                                                                                                                                                                                                                                                                                                                                                                                                                                                                                                                                                                                                    |                                                                                                                                                                                                                                                                                                                                                                                                                              |      |                                                                                         |      |     |                         |          |   |         |              |                       |     |   |     |                     |                       |              |     |     |                        |             |     |                                                                                                                                  |              |                                                                    |             |   |                                                                                                                                                                                  |   |               |                 |   |      |        |                     |                     |   |                                |    |                  |                                                                                                                                       |   |                                                                                                                                                                                                                                                                                                                                                                                             |   |                 |                       |    |    |   |                    |                                                                                                                                                                                                                                                                                                                                                    |              |    |                                                                                                                                                                                                                                                                                                                                                                                                                         |                 |   |   |    |                                                                                                                                                                                                                                                |                     |   |                                                                                                                                                                                                                                                                                                                                                                                                                                                                                                                                                                                                                                                                      |                                                                         |   |                                                                                                                                                                                                                                                                                                                                                            |   |      |      |    |    |    |    |    |             |   |   |   |   |   |             |   |   |                                                                                                                              |  |  |                                                                                                                                                                                                                                                                                                                                                                                                                          |  |             |               |  |  |  |  |  |  |  |  |  |  |  |  |  |  |  |  |  |  |
|                                                                                                                                                                                                                                                                                                                                                                                                                                                                                                                                                                                                                                                                                                                                                                                                                                                                                                                                                                                                                                                                                                             |               |       |                                                                                | B/P      | G/F                                                                                                                               |                                                                                                                                                                                                                                                                                                                                                                                                                                                                                                                                                                                                                                                                                                                                                                                                                                                                                                                                                                                                                                                                                                                                                                                                                                                      |                                                                                                                                                                                                                                                                                                                                                                                                                              |      |                                                                                         |      |     |                         |          |   |         |              |                       |     |   |     |                     |                       |              |     |     |                        |             |     |                                                                                                                                  |              |                                                                    |             |   |                                                                                                                                                                                  |   |               |                 |   |      |        |                     |                     |   |                                |    |                  |                                                                                                                                       |   |                                                                                                                                                                                                                                                                                                                                                                                             |   |                 |                       |    |    |   |                    |                                                                                                                                                                                                                                                                                                                                                    |              |    |                                                                                                                                                                                                                                                                                                                                                                                                                         |                 |   |   |    |                                                                                                                                                                                                                                                |                     |   |                                                                                                                                                                                                                                                                                                                                                                                                                                                                                                                                                                                                                                                                      |                                                                         |   |                                                                                                                                                                                                                                                                                                                                                            |   |      |      |    |    |    |    |    |             |   |   |   |   |   |             |   |   |                                                                                                                              |  |  |                                                                                                                                                                                                                                                                                                                                                                                                                          |  |             |               |  |  |  |  |  |  |  |  |  |  |  |  |  |  |  |  |  |  |
|                                                                                                                                                                                                                                                                                                                                                                                                                                                                                                                                                                                                                                                                                                                                                                                                                                                                                                                                                                                                                                                                                                             | Ab            | Pr    | Dig                                                                            | N        | Y                                                                                                                                 | Y                                                                                                                                                                                                                                                                                                                                                                                                                                                                                                                                                                                                                                                                                                                                                                                                                                                                                                                                                                                                                                                                                                                                                                                                                                                    |                                                                                                                                                                                                                                                                                                                                                                                                                              |      |                                                                                         |      |     |                         |          |   |         |              |                       |     |   |     |                     |                       |              |     |     |                        |             |     |                                                                                                                                  |              |                                                                    |             |   |                                                                                                                                                                                  |   |               |                 |   |      |        |                     |                     |   |                                |    |                  |                                                                                                                                       |   |                                                                                                                                                                                                                                                                                                                                                                                             |   |                 |                       |    |    |   |                    |                                                                                                                                                                                                                                                                                                                                                    |              |    |                                                                                                                                                                                                                                                                                                                                                                                                                         |                 |   |   |    |                                                                                                                                                                                                                                                |                     |   |                                                                                                                                                                                                                                                                                                                                                                                                                                                                                                                                                                                                                                                                      |                                                                         |   |                                                                                                                                                                                                                                                                                                                                                            |   |      |      |    |    |    |    |    |             |   |   |   |   |   |             |   |   |                                                                                                                              |  |  |                                                                                                                                                                                                                                                                                                                                                                                                                          |  |             |               |  |  |  |  |  |  |  |  |  |  |  |  |  |  |  |  |  |  |
| 6920 Neitz/A                                                                                                                                                                                                                                                                                                                                                                                                                                                                                                                                                                                                                                                                                                                                                                                                                                                                                                                                                                                                                                                                                                | 0             | 2     | 3                                                                              | 0        | 1                                                                                                                                 | 2                                                                                                                                                                                                                                                                                                                                                                                                                                                                                                                                                                                                                                                                                                                                                                                                                                                                                                                                                                                                                                                                                                                                                                                                                                                    |                                                                                                                                                                                                                                                                                                                                                                                                                              |      |                                                                                         |      |     |                         |          |   |         |              |                       |     |   |     |                     |                       |              |     |     |                        |             |     |                                                                                                                                  |              |                                                                    |             |   |                                                                                                                                                                                  |   |               |                 |   |      |        |                     |                     |   |                                |    |                  |                                                                                                                                       |   |                                                                                                                                                                                                                                                                                                                                                                                             |   |                 |                       |    |    |   |                    |                                                                                                                                                                                                                                                                                                                                                    |              |    |                                                                                                                                                                                                                                                                                                                                                                                                                         |                 |   |   |    |                                                                                                                                                                                                                                                |                     |   |                                                                                                                                                                                                                                                                                                                                                                                                                                                                                                                                                                                                                                                                      |                                                                         |   |                                                                                                                                                                                                                                                                                                                                                            |   |      |      |    |    |    |    |    |             |   |   |   |   |   |             |   |   |                                                                                                                              |  |  |                                                                                                                                                                                                                                                                                                                                                                                                                          |  |             |               |  |  |  |  |  |  |  |  |  |  |  |  |  |  |  |  |  |  |
| 6930 Neitz/P                                                                                                                                                                                                                                                                                                                                                                                                                                                                                                                                                                                                                                                                                                                                                                                                                                                                                                                                                                                                                                                                                                | 0             | 2     | 3                                                                              | 0        | 1                                                                                                                                 | 2                                                                                                                                                                                                                                                                                                                                                                                                                                                                                                                                                                                                                                                                                                                                                                                                                                                                                                                                                                                                                                                                                                                                                                                                                                                    |                                                                                                                                                                                                                                                                                                                                                                                                                              |      |                                                                                         |      |     |                         |          |   |         |              |                       |     |   |     |                     |                       |              |     |     |                        |             |     |                                                                                                                                  |              |                                                                    |             |   |                                                                                                                                                                                  |   |               |                 |   |      |        |                     |                     |   |                                |    |                  |                                                                                                                                       |   |                                                                                                                                                                                                                                                                                                                                                                                             |   |                 |                       |    |    |   |                    |                                                                                                                                                                                                                                                                                                                                                    |              |    |                                                                                                                                                                                                                                                                                                                                                                                                                         |                 |   |   |    |                                                                                                                                                                                                                                                |                     |   |                                                                                                                                                                                                                                                                                                                                                                                                                                                                                                                                                                                                                                                                      |                                                                         |   |                                                                                                                                                                                                                                                                                                                                                            |   |      |      |    |    |    |    |    |             |   |   |   |   |   |             |   |   |                                                                                                                              |  |  |                                                                                                                                                                                                                                                                                                                                                                                                                          |  |             |               |  |  |  |  |  |  |  |  |  |  |  |  |  |  |  |  |  |  |
|                                                                                                                                                                                                                                                                                                                                                                                                                                                                                                                                                                                                                                                                                                                                                                                                                                                                                                                                                                                                                                                                                                             | Q1            | Q2    | Q3                                                                             | Q4       | CC                                                                                                                                |                                                                                                                                                                                                                                                                                                                                                                                                                                                                                                                                                                                                                                                                                                                                                                                                                                                                                                                                                                                                                                                                                                                                                                                                                                                      |                                                                                                                                                                                                                                                                                                                                                                                                                              |      |                                                                                         |      |     |                         |          |   |         |              |                       |     |   |     |                     |                       |              |     |     |                        |             |     |                                                                                                                                  |              |                                                                    |             |   |                                                                                                                                                                                  |   |               |                 |   |      |        |                     |                     |   |                                |    |                  |                                                                                                                                       |   |                                                                                                                                                                                                                                                                                                                                                                                             |   |                 |                       |    |    |   |                    |                                                                                                                                                                                                                                                                                                                                                    |              |    |                                                                                                                                                                                                                                                                                                                                                                                                                         |                 |   |   |    |                                                                                                                                                                                                                                                |                     |   |                                                                                                                                                                                                                                                                                                                                                                                                                                                                                                                                                                                                                                                                      |                                                                         |   |                                                                                                                                                                                                                                                                                                                                                            |   |      |      |    |    |    |    |    |             |   |   |   |   |   |             |   |   |                                                                                                                              |  |  |                                                                                                                                                                                                                                                                                                                                                                                                                          |  |             |               |  |  |  |  |  |  |  |  |  |  |  |  |  |  |  |  |  |  |
| 695__ CRT %                                                                                                                                                                                                                                                                                                                                                                                                                                                                                                                                                                                                                                                                                                                                                                                                                                                                                                                                                                                                                                                                                                 |               |       |                                                                                |          |                                                                                                                                   |                                                                                                                                                                                                                                                                                                                                                                                                                                                                                                                                                                                                                                                                                                                                                                                                                                                                                                                                                                                                                                                                                                                                                                                                                                                      |                                                                                                                                                                                                                                                                                                                                                                                                                              |      |                                                                                         |      |     |                         |          |   |         |              |                       |     |   |     |                     |                       |              |     |     |                        |             |     |                                                                                                                                  |              |                                                                    |             |   |                                                                                                                                                                                  |   |               |                 |   |      |        |                     |                     |   |                                |    |                  |                                                                                                                                       |   |                                                                                                                                                                                                                                                                                                                                                                                             |   |                 |                       |    |    |   |                    |                                                                                                                                                                                                                                                                                                                                                    |              |    |                                                                                                                                                                                                                                                                                                                                                                                                                         |                 |   |   |    |                                                                                                                                                                                                                                                |                     |   |                                                                                                                                                                                                                                                                                                                                                                                                                                                                                                                                                                                                                                                                      |                                                                         |   |                                                                                                                                                                                                                                                                                                                                                            |   |      |      |    |    |    |    |    |             |   |   |   |   |   |             |   |   |                                                                                                                              |  |  |                                                                                                                                                                                                                                                                                                                                                                                                                          |  |             |               |  |  |  |  |  |  |  |  |  |  |  |  |  |  |  |  |  |  |
| 696__ PSC %                                                                                                                                                                                                                                                                                                                                                                                                                                                                                                                                                                                                                                                                                                                                                                                                                                                                                                                                                                                                                                                                                                 |               |       |                                                                                |          |                                                                                                                                   |                                                                                                                                                                                                                                                                                                                                                                                                                                                                                                                                                                                                                                                                                                                                                                                                                                                                                                                                                                                                                                                                                                                                                                                                                                                      |                                                                                                                                                                                                                                                                                                                                                                                                                              |      |                                                                                         |      |     |                         |          |   |         |              |                       |     |   |     |                     |                       |              |     |     |                        |             |     |                                                                                                                                  |              |                                                                    |             |   |                                                                                                                                                                                  |   |               |                 |   |      |        |                     |                     |   |                                |    |                  |                                                                                                                                       |   |                                                                                                                                                                                                                                                                                                                                                                                             |   |                 |                       |    |    |   |                    |                                                                                                                                                                                                                                                                                                                                                    |              |    |                                                                                                                                                                                                                                                                                                                                                                                                                         |                 |   |   |    |                                                                                                                                                                                                                                                |                     |   |                                                                                                                                                                                                                                                                                                                                                                                                                                                                                                                                                                                                                                                                      |                                                                         |   |                                                                                                                                                                                                                                                                                                                                                            |   |      |      |    |    |    |    |    |             |   |   |   |   |   |             |   |   |                                                                                                                              |  |  |                                                                                                                                                                                                                                                                                                                                                                                                                          |  |             |               |  |  |  |  |  |  |  |  |  |  |  |  |  |  |  |  |  |  |
| 697__ VAC #                                                                                                                                                                                                                                                                                                                                                                                                                                                                                                                                                                                                                                                                                                                                                                                                                                                                                                                                                                                                                                                                                                 |               |       |                                                                                |          |                                                                                                                                   |                                                                                                                                                                                                                                                                                                                                                                                                                                                                                                                                                                                                                                                                                                                                                                                                                                                                                                                                                                                                                                                                                                                                                                                                                                                      |                                                                                                                                                                                                                                                                                                                                                                                                                              |      |                                                                                         |      |     |                         |          |   |         |              |                       |     |   |     |                     |                       |              |     |     |                        |             |     |                                                                                                                                  |              |                                                                    |             |   |                                                                                                                                                                                  |   |               |                 |   |      |        |                     |                     |   |                                |    |                  |                                                                                                                                       |   |                                                                                                                                                                                                                                                                                                                                                                                             |   |                 |                       |    |    |   |                    |                                                                                                                                                                                                                                                                                                                                                    |              |    |                                                                                                                                                                                                                                                                                                                                                                                                                         |                 |   |   |    |                                                                                                                                                                                                                                                |                     |   |                                                                                                                                                                                                                                                                                                                                                                                                                                                                                                                                                                                                                                                                      |                                                                         |   |                                                                                                                                                                                                                                                                                                                                                            |   |      |      |    |    |    |    |    |             |   |   |   |   |   |             |   |   |                                                                                                                              |  |  |                                                                                                                                                                                                                                                                                                                                                                                                                          |  |             |               |  |  |  |  |  |  |  |  |  |  |  |  |  |  |  |  |  |  |
| <b>6990 OD COMMENTS</b>                                                                                                                                                                                                                                                                                                                                                                                                                                                                                                                                                                                                                                                                                                                                                                                                                                                                                                                                                                                                                                                                                     |               |       | <b>6986 NSC</b><br>Better 0<br>Same 1<br>Worse 2<br>CG 8<br>NA 9               |          | <b>6988 CORT</b><br>0<br>1<br>2<br>8<br>9                                                                                         |                                                                                                                                                                                                                                                                                                                                                                                                                                                                                                                                                                                                                                                                                                                                                                                                                                                                                                                                                                                                                                                                                                                                                                                                                                                      | <b>6990 PSC</b><br>0<br>1<br>2<br>8<br>9                                                                                                                                                                                                                                                                                                                                                                                     |      | <b>6992 LENS FLAG</b><br>NO 0<br>Y/Q 1<br>Y/OTH 2<br><b>6995 LENS EX</b><br>0 No 1+ Yes |      |     |                         |          |   |         |              |                       |     |   |     |                     |                       |              |     |     |                        |             |     |                                                                                                                                  |              |                                                                    |             |   |                                                                                                                                                                                  |   |               |                 |   |      |        |                     |                     |   |                                |    |                  |                                                                                                                                       |   |                                                                                                                                                                                                                                                                                                                                                                                             |   |                 |                       |    |    |   |                    |                                                                                                                                                                                                                                                                                                                                                    |              |    |                                                                                                                                                                                                                                                                                                                                                                                                                         |                 |   |   |    |                                                                                                                                                                                                                                                |                     |   |                                                                                                                                                                                                                                                                                                                                                                                                                                                                                                                                                                                                                                                                      |                                                                         |   |                                                                                                                                                                                                                                                                                                                                                            |   |      |      |    |    |    |    |    |             |   |   |   |   |   |             |   |   |                                                                                                                              |  |  |                                                                                                                                                                                                                                                                                                                                                                                                                          |  |             |               |  |  |  |  |  |  |  |  |  |  |  |  |  |  |  |  |  |  |

ENTERED \_\_\_/\_\_\_/\_\_\_

VERIFIED \_\_\_/\_\_\_/\_\_\_

C. Beaver Dam Eye Study detail grading form

ID# \_\_\_\_\_ EYE R L

NAMECODE \_\_\_\_\_

RLIST \_\_\_\_\_

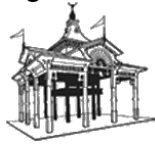

**BEAVER DAM V  
AGE-RELATED  
MACULOPATHY  
GRADING FORM**

7) GRADER \_\_\_\_\_

8) DATE GRADED \_\_\_\_\_

9) Does camera equipment differ?  Yes  No

10) Is eye excluded?  Yes  No

| FIELDS PRESENT                     | (11) Field 1 | (12) Field 2 | (13) Field 3 | (18) Artifact | F2 QUALITY | (14) Focus | (15) Field | (16) Stereo | (17) Overall Quality |
|------------------------------------|--------------|--------------|--------------|---------------|------------|------------|------------|-------------|----------------------|
| Yes, gradable                      | 0            | 0            | 0            | No 0          | Good       | 1          | 1          | 1           | 1                    |
| Yes, not gradable                  | 1            | 1            | 1            | Yes 2         | Fair       | 2          | 2          | 2           | 2                    |
| No                                 | 2 (Skip F1)  | 2            | 2            |               | Poor       | 3          | 3          | 3           | 3                    |
| No -- data from surrounding fields |              | 3            |              |               |            |            |            |             |                      |

CLOCKWISE  COUNTER CLOCKWISE

| 100 Drusen Size  | CPT 101 | CC 102 | INNER |       |       |       | OUTER |       |       |       | OG F2 111 | F1 NAS 112 |
|------------------|---------|--------|-------|-------|-------|-------|-------|-------|-------|-------|-----------|------------|
|                  |         |        | S 103 | N 104 | I 105 | T 106 | S 107 | N 108 | I 109 | T 110 |           |            |
| None             | 0       | 0      | 0     | 0     | 0     | 0     | 0     | 0     | 0     | 0     | 0         | 0          |
| Questionable     | 1       | 1      | 1     | 1     | 1     | 1     | 1     | 1     | 1     | 1     | 1         | 1          |
| < C <sub>0</sub> | 2       | 2      | 2     | 2     | 2     | 2     | 2     | 2     | 2     | 2     | 2         | 2          |
| < C <sub>1</sub> | --      | 3      | 3     | 3     | 3     | 3     | 3     | 3     | 3     | 3     | 3         | 3          |
| < C <sub>2</sub> | --      | 4      | 4     | 4     | 4     | 4     | 4     | 4     | 4     | 4     | 4         | 4          |
| ≥ C <sub>2</sub> | --      | 5      | 5     | 5     | 5     | 5     | 5     | 5     | 5     | 5     | 5         | 5          |
| Reticular        | 6       | 6      | 6     | 6     | 6     | 6     | 6     | 6     | 6     | 6     | 6         | 6          |
| CG, ret.         | 7       | 7      | 7     | 7     | 7     | 7     | 7     | 7     | 7     | 7     | 7         | 7          |
| CG, photo        | 8       | 8      | 8     | 8     | 8     | 8     | 8     | 8     | 8     | 8     | 8         | 8          |

| 200 Drusen Area  | CC 202 | S 203 | N 204 | I 205 | T 206 | S 207 | N 208 | I 209 | T 210 |
|------------------|--------|-------|-------|-------|-------|-------|-------|-------|-------|
| N/A              | 9      | 9     | 9     | 9     | 9     | 9     | 9     | 9     | 9     |
| < C <sub>0</sub> | 0      | 0     | 0     | 0     | 0     | 0     | 0     | 0     | 0     |
| < C <sub>1</sub> | 1      | 1     | 1     | 1     | 1     | 1     | 1     | 1     | 1     |
| < Cir. 1         | --     | 2     | 2     | 2     | 2     | 2     | 2     | 2     | 2     |
| < 2 x Cir. 1     | 3      | 3     | 3     | 3     | 3     | 3     | 3     | 3     | 3     |
| < Cir. 2         | 4      | 4     | 4     | 4     | 4     | 4     | 4     | 4     | 4     |
| < 2 x Cir. 2     | 5      | 5     | 5     | 5     | 5     | 5     | 5     | 5     | 5     |
| < 4 x Cir. 2     | 6      | 6     | 6     | 6     | 6     | 6     | 6     | 6     | 6     |
| < 50%            | 7      | 7     | 7     | 7     | 7     | 7     | 7     | 7     | 7     |
| ≥ 50%            | 8      | 8     | 8     | 8     | 8     | 8     | 8     | 8     | 8     |

| 320 Global Area  |     |
|------------------|-----|
| None             | 0   |
| Questionable     | 1   |
| < C <sub>0</sub> | 2   |
| < C <sub>1</sub> | 3   |
| < C <sub>2</sub> | 4   |
| < I <sub>2</sub> | 5   |
| < O <sub>2</sub> | 6   |
| < ½ DA           | 7.1 |
| ≥ ½ DA           | 7.5 |
| CG               | 8   |

| 600 Drusen Type | CPT 641 | CC 642 | S 643 | N 644 | I 645 | T 646 | S 647 | N 648 | I 649 | T 650 | OG 651 |
|-----------------|---------|--------|-------|-------|-------|-------|-------|-------|-------|-------|--------|
| N/A             | 9       | 9      | 9     | 9     | 9     | 9     | 9     | 9     | 9     | 9     | 9      |
| Hard indistinct | 0       | 0      | 0     | 0     | 0     | 0     | 0     | 0     | 0     | 0     | 0      |
| Hard distinct   | 1       | 1      | 1     | 1     | 1     | 1     | 1     | 1     | 1     | 1     | 1      |
| Soft distinct   | 2       | 2      | 2     | 2     | 2     | 2     | 2     | 2     | 2     | 2     | 2      |
| Soft indistinct | 3       | 3      | 3     | 3     | 3     | 3     | 3     | 3     | 3     | 3     | 3      |
| Reticular       | 4       | 4      | 4     | 4     | 4     | 4     | 4     | 4     | 4     | 4     | 4      |
| CG, ret.        | 7       | 7      | 7     | 7     | 7     | 7     | 7     | 7     | 7     | 7     | 7      |
| CG, photo       | 8       | 8      | 8     | 8     | 8     | 8     | 8     | 8     | 8     | 8     | 8      |

| Absent             | 0 |   |   |
|--------------------|---|---|---|
| Questionable       | 1 |   |   |
| Present            | 2 |   |   |
| Predominant        | 3 |   |   |
| CG                 | 8 |   |   |
| 655-669 Grid Types | C | I | O |
| Stippling          |   |   |   |
| Hard Dis.          |   |   |   |
| Soft Dis.          |   |   |   |
| Soft Indis.        |   |   |   |
| Reticular          |   |   |   |



| 513 Drusen Confluence<br>Longest Continuous<br>Dimension (If Dru-Type = Soft) |   |
|-------------------------------------------------------------------------------|---|
| N/A                                                                           | 9 |
| None                                                                          | 0 |
| Questionable                                                                  | 1 |
| < 250 u                                                                       | 2 |
| < 500 u                                                                       | 3 |
| < 1000 u                                                                      | 4 |
| ≥ 1000 u                                                                      | 5 |
| Reticular Drusen                                                              | 6 |

| 700 RPE Depigmentation<br>Any? <input type="checkbox"/> Yes <input type="checkbox"/> No | CPT<br>701 | CC<br>702 | S<br>703 | N<br>704 | I<br>705 | T<br>706 | S<br>707 | N<br>708 | I<br>709 | T<br>710 |
|-----------------------------------------------------------------------------------------|------------|-----------|----------|----------|----------|----------|----------|----------|----------|----------|
| None                                                                                    | 0          | 0         | 0        | 0        | 0        | 0        | 0        | 0        | 0        | 0        |
| Questionable                                                                            | 1          | 1         | 1        | 1        | 1        | 1        | 1        | 1        | 1        | 1        |
| < 6.25% (circle 2)                                                                      | 1.5        | 1.5       | 1.5      | 1.5      | 1.5      | 1.5      | 1.5      | 1.5      | 1.5      | 1.5      |
| < 25%                                                                                   | --         | 2         | 2        | 2        | 2        | 2        | 2        | 2        | 2        | 2        |
| < 50%                                                                                   | --         | 3         | 3        | 3        | 3        | 3        | 3        | 3        | 3        | 3        |
| ≥ 50%                                                                                   | --         | 4         | 4        | 4        | 4        | 4        | 4        | 4        | 4        | 4        |
| CG, ret.                                                                                | 7          | 7         | 7        | 7        | 7        | 7        | 7        | 7        | 7        | 7        |
| CG, photo                                                                               | 8          | 8         | 8        | 8        | 8        | 8        | 8        | 8        | 8        | 8        |

| Global RPE<br>720 |   |
|-------------------|---|
| None              | 0 |
| Quest.            | 1 |
| <C <sub>2</sub>   | 2 |
| <I <sub>2</sub>   | 3 |
| <½ DA             | 4 |
| ≥½ DA             | 5 |
| CG                | 8 |

| 800 Increased Pigment<br>Any? <input type="checkbox"/> Yes <input type="checkbox"/> No | CPT<br>801 | CC<br>802 | S<br>803 | N<br>804 | I<br>805 | T<br>806 | S<br>807 | N<br>808 | I<br>809 | T<br>810 | OG<br>811 |
|----------------------------------------------------------------------------------------|------------|-----------|----------|----------|----------|----------|----------|----------|----------|----------|-----------|
| None                                                                                   | 0          | 0         | 0        | 0        | 0        | 0        | 0        | 0        | 0        | 0        | 0         |
| Questionable                                                                           | 1          | 1         | 1        | 1        | 1        | 1        | 1        | 1        | 1        | 1        | 1         |
| < C <sub>1</sub>                                                                       | 1.5        | 1.5       | 1.5      | 1.5      | 1.5      | 1.5      | 1.5      | 1.5      | 1.5      | 1.5      | 1.5       |
| < C <sub>2</sub>                                                                       | --         | 2         | 2        | 2        | 2        | 2        | 2        | 2        | 2        | 2        | 2         |
| ≥ C <sub>2</sub>                                                                       | --         | 3         | 3        | 3        | 3        | 3        | 3        | 3        | 3        | 3        | 3         |
| Pigment/other                                                                          | 6          | 6         | 6        | 6        | 6        | 6        | 6        | 6        | 6        | 6        | 6         |
| CG, ret.                                                                               | 7          | 7         | 7        | 7        | 7        | 7        | 7        | 7        | 7        | 7        | 7         |
| CG, photo                                                                              | 8          | 8         | 8        | 8        | 8        | 8        | 8        | 8        | 8        | 8        | 8         |

| Global Inc Pigment<br>820 |   |
|---------------------------|---|
| Absent                    | 0 |
| Questionable              | 1 |
| <C <sub>0</sub>           | 2 |
| <C <sub>1</sub>           | 3 |
| <C <sub>2</sub>           | 4 |
| ≥C <sub>2</sub>           | 5 |
| Pigment/other             | 7 |
| CG                        | 8 |

| 1700 Geographic Atrophy<br>Any? <input type="checkbox"/> Yes <input type="checkbox"/> No | CPT<br>1701 | CC<br>1702 | S<br>1703 | N<br>1704 | I<br>1705 | T<br>1706 | S<br>1707 | N<br>1708 | I<br>1709 | T<br>1710 | OG<br>1711 |
|------------------------------------------------------------------------------------------|-------------|------------|-----------|-----------|-----------|-----------|-----------|-----------|-----------|-----------|------------|
| Absent                                                                                   | 0           | 0          | 0         | 0         | 0         | 0         | 0         | 0         | 0         | 0         | 0          |
| Questionable                                                                             | 1           | 1          | 1         | 1         | 1         | 1         | 1         | 1         | 1         | 1         | 1          |
| < 25%                                                                                    | 1.5         | 1.5        | 1.5       | 1.5       | 1.5       | 1.5       | 1.5       | 1.5       | 1.5       | 1.5       | 1.5        |
| < 50%                                                                                    | --          | 2          | 2         | 2         | 2         | 2         | 2         | 2         | 2         | 2         | 2          |
| ≥ 50%                                                                                    | --          | 3          | 3         | 3         | 3         | 3         | 3         | 3         | 3         | 3         | 3          |
| CG, ret.                                                                                 | 7           | 7          | 7         | 7         | 7         | 7         | 7         | 7         | 7         | 7         | 7          |
| CG, photo                                                                                | 8           | 8          | 8         | 8         | 8         | 8         | 8         | 8         | 8         | 8         | 8          |

| 1800 Surface Wrinkling<br>Any? <input type="checkbox"/> Yes <input type="checkbox"/> No | CPT<br>1801 | CC<br>1802 | S<br>1803 | N<br>1804 | I<br>1805 | T<br>1806 | S<br>1807 | N<br>1808 | I<br>1809 | T<br>1810 |
|-----------------------------------------------------------------------------------------|-------------|------------|-----------|-----------|-----------|-----------|-----------|-----------|-----------|-----------|
| Absent                                                                                  | 0           | 0          | 0         | 0         | 0         | 0         | 0         | 0         | 0         | 0         |
| Questionable                                                                            | 1           | 1          | 1         | 1         | 1         | 1         | 1         | 1         | 1         | 1         |
| Cello. reflx. only                                                                      | 2           | 2          | 2         | 2         | 2         | 2         | 2         | 2         | 2         | 2         |
| Traction lines                                                                          | 3           | 3          | 3         | 3         | 3         | 3         | 3         | 3         | 3         | 3         |
| Glial w/o tract.                                                                        | 4           | 4          | 4         | 4         | 4         | 4         | 4         | 4         | 4         | 4         |
| Glial w/tract.                                                                          | 5           | 5          | 5         | 5         | 5         | 5         | 5         | 5         | 5         | 5         |
| CG, ret.                                                                                | 7           | 7          | 7         | 7         | 7         | 7         | 7         | 7         | 7         | 7         |
| CG, photo                                                                               | 8           | 8          | 8         | 8         | 8         | 8         | 8         | 8         | 8         | 8         |

**1000**  YES  NO **LONG FORM:** Are any lesions 900, 1800, 1100, 1300 or 1400 ≥ 0? If NO, skip to item 1900.

**1200 PED/RD**  
Any?  Yes  No

|              | CPT<br>1201 | CC<br>1202 | S<br>1203 | N<br>1204 | I<br>1205 | T<br>1206 | S<br>1207 | N<br>1208 | I<br>1209 | T<br>1210 | OG<br>1211 |
|--------------|-------------|------------|-----------|-----------|-----------|-----------|-----------|-----------|-----------|-----------|------------|
| Absent       | 0           | 0          | 0         | 0         | 0         | 0         | 0         | 0         | 0         | 0         | 0          |
| Questionable | 1           | 1          | 1         | 1         | 1         | 1         | 1         | 1         | 1         | 1         | 1          |
| PED ≥90%     | 2           | 2          | 2         | 2         | 2         | 2         | 2         | 2         | 2         | 2         | 2          |
| MIXED        | 3           | 3          | 3         | 3         | 3         | 3         | 3         | 3         | 3         | 3         | 3          |
| RD ≥90%      | 4           | 4          | 4         | 4         | 4         | 4         | 4         | 4         | 4         | 4         | 4          |
| CG, ret.     | 7           | 7          | 7         | 7         | 7         | 7         | 7         | 7         | 7         | 7         | 7          |
| CG, photo    | 8           | 8          | 8         | 8         | 8         | 8         | 8         | 8         | 8         | 8         | 8          |

1214.  YES  NO Is F2 total ≥ 1/2 DA?

1215. If 1214 is YES, give total amount in disc areas \_\_\_\_\_.

**1500 Subret. Hemorrhage**  
Any?  Yes  No

|              | CPT<br>1501 | CC<br>1502 | S<br>1503 | N<br>1504 | I<br>1505 | T<br>1506 | S<br>1507 | N<br>1508 | I<br>1509 | T<br>1510 | OG<br>1511 |
|--------------|-------------|------------|-----------|-----------|-----------|-----------|-----------|-----------|-----------|-----------|------------|
| Absent       | 0           | 0          | 0         | 0         | 0         | 0         | 0         | 0         | 0         | 0         | 0          |
| Questionable | 1           | 1          | 1         | 1         | 1         | 1         | 1         | 1         | 1         | 1         | 1          |
| Present      | 2           | 2          | 2         | 2         | 2         | 2         | 2         | 2         | 2         | 2         | 2          |
| CG, ret.     | 7           | 7          | 7         | 7         | 7         | 7         | 7         | 7         | 7         | 7         | 7          |
| CG, photo    | 8           | 8          | 8         | 8         | 8         | 8         | 8         | 8         | 8         | 8         | 8          |

**1600 Fibrous Scar**  
Any?  Yes  No

|              | CPT<br>1601 | CC<br>1602 | S<br>1603 | N<br>1604 | I<br>1605 | T<br>1606 | S<br>1607 | N<br>1608 | I<br>1609 | T<br>1610 | OG<br>1611 |
|--------------|-------------|------------|-----------|-----------|-----------|-----------|-----------|-----------|-----------|-----------|------------|
| Absent       | 0           | 0          | 0         | 0         | 0         | 0         | 0         | 0         | 0         | 0         | 0          |
| Questionable | 1           | 1          | 1         | 1         | 1         | 1         | 1         | 1         | 1         | 1         | 1          |
| < 25%        | 2           | 2          | 2         | 2         | 2         | 2         | 2         | 2         | 2         | 2         | 2          |
| < 50%        | --          | 3          | 3         | 3         | 3         | 3         | 3         | 3         | 3         | 3         | 3          |
| ≥ 50%        | --          | 4          | 4         | 4         | 4         | 4         | 4         | 4         | 4         | 4         | 4          |
| CG, ret.     | 7           | 7          | 7         | 7         | 7         | 7         | 7         | 7         | 7         | 7         | 7          |
| CG, photo    | 8           | 8          | 8         | 8         | 8         | 8         | 8         | 8         | 8         | 8         | 8          |

1900 Any lesions 2001 - 3903  
> 0? If NO, STOP.

Any?  Yes  No

|                         | All Fields |   |     |         |          |   | All of F2 |   |     |         |          |   | Center Point |   |     |         |          |   |
|-------------------------|------------|---|-----|---------|----------|---|-----------|---|-----|---------|----------|---|--------------|---|-----|---------|----------|---|
|                         | None       | Q | Yes | CG ret. | CG photo |   | None      | Q | Yes | CG ret. | CG photo |   | None         | Q | Yes | CG ret. | CG photo |   |
| Angioid Streak          | 2001       | 0 | 1   | 2       | 7        | 8 | 2002      | 0 | 1   | 2       | 7        | 8 | 2003         | 0 | 1   | 2       | 7        | 8 |
| Asteroid Hyalosis       | 2101       | 0 | 1   | 2       | 7        | 8 | 2102      | 0 | 1   | 2       | 7        | 8 |              |   |     |         |          |   |
| Br. Art. Occlusion      | 2201       | 0 | 1   | 2       | 7        | 8 | 2202      | 0 | 1   | 2       | 7        | 8 | 2203         | 0 | 1   | 2       | 7        | 8 |
| Br. Vein Occlusion      | 2301       | 0 | 1   | 2       | 7        | 8 | 2302      | 0 | 1   | 2       | 7        | 8 | 2303         | 0 | 1   | 2       | 7        | 8 |
| Ctr. Art. Occlusion     | 2401       | 0 | 1   | 2       | 7        | 8 | 2402      | 0 | 1   | 2       | 7        | 8 |              |   |     |         |          |   |
| Ctr. Vein Occlusion     | 2501       | 0 | 1   | 2       | 7        | 8 | 2502      | 0 | 1   | 2       | 7        | 8 |              |   |     |         |          |   |
| Chorioretinal Scar      | 2601       | 0 | 1   | 2       | 7        | 8 | 2602      | 0 | 1   | 2       | 7        | 8 | 2603         | 0 | 1   | 2       | 7        | 8 |
| Coloboma or Staphyl.    | 2701       | 0 | 1   | 2       | 7        | 8 | 2702      | 0 | 1   | 2       | 7        | 8 | 2703         | 0 | 1   | 2       | 7        | 8 |
| Large C/D               | 2741       | 0 | 1   | 2       | 7        | 8 |           |   |     |         |          |   |              |   |     |         |          |   |
| Retinal Edema           | 2751       | 0 | 1   | 2       | 7        | 8 | 2752      | 0 | 1   | 2       | 7        | 8 | 2753         | 0 | 1   | 2       | 7        | 8 |
| RH/MA                   | 2761       | 0 | 1   | 2       | 7        | 8 | 2762      | 0 | 1   | 2       | 7        | 8 | 2763         | 0 | 1   | 2       | 7        | 8 |
| Hard Exudate            | 2771       | 0 | 1   | 2       | 7        | 8 | 2772      | 0 | 1   | 2       | 7        | 8 | 2773         | 0 | 1   | 2       | 7        | 8 |
| Diab. Ret. (Lev. 20-55) | 2801       | 0 | 1   | 2       | 7        | 8 | 2802      | 0 | 1   | 2       | 7        | 8 |              |   |     |         |          |   |
| Diab. Ret. (Lev. ≥ 60)  | 2901       | 0 | 1   | 2       | 7        | 8 | 2902      | 0 | 1   | 2       | 7        | 8 |              |   |     |         |          |   |
| Art. Changes            | 3001       | 0 | 1   | 2       | 7        | 8 | 3002      | 0 | 1   | 2       | 7        | 8 |              |   |     |         |          |   |
| Hollenhorst Plaque      | 3005       | 0 | 1   | 2       | 7        | 8 | 3006      | 0 | 1   | 2       | 7        | 8 |              |   |     |         |          |   |
| Macular Hole            | 3101       | 0 | 1   | 2       | 7        | 8 | 3102      | 0 | 1   | 2       | 7        | 8 | 3103         | 0 | 1   | 2       | 7        | 8 |
| Macular Cyst            | 3105       | 0 | 1   | 2       | 7        | 8 | 3106      | 0 | 1   | 2       | 7        | 8 | 3107         | 0 | 1   | 2       | 7        | 8 |
| Nevus, Choroidal        | 3201       | 0 | 1   | 2       | 7        | 8 | 3202      | 0 | 1   | 2       | 7        | 8 | 3203         | 0 | 1   | 2       | 7        | 8 |
| Medull. Nrv. Fbr.       | 3205       | 0 | 1   | 2       | 7        | 8 | 3206      | 0 | 1   | 2       | 7        | 8 |              |   |     |         |          |   |
| POHS                    | 3301       | 0 | 1   | 2       | 7        | 8 | 3302      | 0 | 1   | 2       | 7        | 8 | 3303         | 0 | 1   | 2       | 7        | 8 |
| Hypopigment. of RPE     | 3401       | 0 | 1   | 2       | 7        | 8 | 3402      | 0 | 1   | 2       | 7        | 8 | 3403         | 0 | 1   | 2       | 7        | 8 |
| Preret. Hem./Vit. Hem.  | 3501       | 0 | 1   | 2       | 7        | 8 | 3502      | 0 | 1   | 2       | 7        | 8 | 3503         | 0 | 1   | 2       | 7        | 8 |
| Glial/Vit. Opac.        | 3505       | 0 | 1   | 2       | 7        | 8 | 3506      | 0 | 1   | 2       | 7        | 8 | 3507         | 0 | 1   | 2       | 7        | 8 |
| Photocoag. Scars        | 3601       | 0 | 1   | 2       | 7        | 8 | 3602      | 0 | 1   | 2       | 7        | 8 | 3603         | 0 | 1   | 2       | 7        | 8 |
| Local Rx for ARM        | 3605       | 0 | 1   | 2       | 7        | 8 | 3606      | 0 | 1   | 2       | 7        | 8 | 3607         | 0 | 1   | 2       | 7        | 8 |
| Peripapillary Atrophy   | 3701       | 0 | 1   | 2       | 7        | 8 | 3702      | 0 | 1   | 2       | 7        | 8 | 3703         | 0 | 1   | 2       | 7        | 8 |
| Calcified Drusen        | 3705       | 0 | 1   | 2       | 7        | 8 | 3706      | 0 | 1   | 2       | 7        | 8 | 3707         | 0 | 1   | 2       | 7        | 8 |
| Pseudotemporal Drusen   | 3751       | 0 | 1   | 2       | 7        | 8 | 3752      | 0 | 1   | 2       | 7        | 8 |              |   |     |         |          |   |
| Subret. Neovascul.      | 3801       | 0 | 1   | 2       | 7        | 8 | 3802      | 0 | 1   | 2       | 7        | 8 | 3803         | 0 | 1   | 2       | 7        | 8 |
| Choroidal Deg./Other    | 3805       | 0 | 1   | 2       | 7        | 8 | 3806      | 0 | 1   | 2       | 7        | 8 | 3807         | 0 | 1   | 2       | 7        | 8 |
| OTHER - EXPLAIN         | 3901       | 0 | 1   | 2       | 7        | 8 | 3902      | 0 | 1   | 2       | 7        | 8 | 3903         | 0 | 1   | 2       | 7        | 8 |

4000) COMMENTS: \_\_\_\_\_

## **D. Beaver Dam Eye Study and Los Angeles Latino Eye Study 3-Step Age-related Macular Degeneration (AMD) Severity Scale**

### *Late AMD*

Any of the following lesions are present:

- Geographic Atrophy
- Pigment epithelial detachment/sensory serous retinal detachment
- Subretinal hemorrhage, or subretinal new vessels visible
- Subretinal fibrous scar
- Laser treatment for AMD

### *Early AMD*

- Any Drusen present plus pigmentary abnormalities (Increased Pigment and/or Retinal Pigment Epithelial Depigmentation) present.
- Soft Indistinct Drusen or Reticular Drusen present in the absence of pigmentary abnormalities.

### *No AMD*

- Neither Late nor Early AMD definitions are met and Maximum Drusen Size is gradable.

### *Cannot Grade*

- Does not meet Late, Early, or No AMD definitions and Maximum Drusen Size is not gradable.

## E. Beaver Dam Eye Study 6-Step Age-Related Macular Degeneration Severity Scale

| Level | Description                                                                                                                                                                                                                                                                                                                                                                                                                                                                           |
|-------|---------------------------------------------------------------------------------------------------------------------------------------------------------------------------------------------------------------------------------------------------------------------------------------------------------------------------------------------------------------------------------------------------------------------------------------------------------------------------------------|
| 10    | Hard drusen or small soft drusen (< 125 microns in diameter) only, regardless of area of involvement, and no pigmentary abnormality (increased retinal pigment or RPE depigmentation) present.                                                                                                                                                                                                                                                                                        |
| 20    | Hard drusen or small soft drusen (< 125 microns in diameter), regardless of area of involvement, with any pigmentary abnormality (increased retinal pigment present and/or RPE depigmentation) present<br><br><i>OR</i><br><br>Soft drusen (≥ 125 microns in diameter) with drusen area < 196,350 square microns (equivalent to a circle with a diameter of 500 microns) and no pigmentary abnormalities                                                                              |
| 30    | Soft drusen (≥ 125 microns in diameter with drusen area < 196,350 square microns (equivalent to a circle with a diameter of 500 microns) with any pigmentary abnormality (increased retinal pigment present and/or RPE depigmentation) present<br><br><i>OR</i><br><br>Soft drusen (≥ 125 microns in diameter) with drusen area ≥ 196,350 square microns (equivalent to a circle with a diameter of 500 microns) with or without increased retinal pigment but no RPE depigmentation. |
| 40    | Soft drusen (≥ 125 microns in diameter) with drusen area ≥ 196,350 square microns (equivalent to a circle with a diameter of 500 microns) and RPE depigmentation present, with or without increased retinal pigment.                                                                                                                                                                                                                                                                  |
| 50    | Pure geographic atrophy in the absence of exudative macular degeneration.                                                                                                                                                                                                                                                                                                                                                                                                             |
| 60    | Exudative macular degeneration with or without geographic atrophy present.                                                                                                                                                                                                                                                                                                                                                                                                            |

RPE, retinal pigment epithelium.

F. Blue Mountains Eye Study AMD grading form

I.D. # \_\_\_\_\_ Eye \_\_\_\_\_ **BMES Maculopathy Summary Grading Form Oct, 2003**

NameCode \_\_\_\_\_  
 Grader \_\_\_\_\_  
 Date \_\_\_\_/\_\_\_\_/\_\_\_\_  
 Entered \_\_\_\_\_  
 Verified \_\_\_\_\_

| Fields      | Fld 1 | Fld 2 | Fld 3 | Nasal | F2 Qual | Focus | Field | Stereo |
|-------------|-------|-------|-------|-------|---------|-------|-------|--------|
| gradeable   | 0     | 0     | 0     | 0     | good    | 1     | 1     | 1      |
| ungradeable | 1     | 1     | 1     | 1     | fair    | 2     | 2     | 2      |
| not present | 2     | 2     | 2     | 2     | poor    | 3     | 3     | 3      |

**Maculopathy** None 0 Quest or Def 2 CG 8

1. **Detachments** None 0 Quest 1 Yes 2 Area within field 2 \_\_\_\_\_ DA  
 Old/Atrophic Disciform None 0 Quest 1 Yes 2

**Field 2** None Quest Yes CG **Central + Inner Subfields** None Quest Yes CG

|                     |   |         |   |   |            |   |              |   |
|---------------------|---|---------|---|---|------------|---|--------------|---|
| Drusenoid PED       | 0 | 1       | 2 | 8 | 0          | 1 | 2            | 8 |
| Non-Drusenoid PED   | 0 | 1       | 2 | 8 | 0          | 1 | 2            | 8 |
| Type (circle one)   |   | 1. Dome |   |   | 2. Shallow |   | 3. Irregular |   |
| SSR/Haem RD         | 0 | 1       | 2 | 8 | 0          | 1 | 2            | 8 |
| Hard Exudate        | 0 | 1       | 2 | 8 | 0          | 1 | 2            | 8 |
| SubRet/SubRPE Haem  | 0 | 1       | 2 | 8 | 0          | 1 | 2            | 8 |
| Subretinal Fibrosis | 0 | 1       | 2 | 8 | 0          | 1 | 2            | 8 |
| Laser Rx AMD        | 0 | 1       | 2 | 8 | 0          | 1 | 2            | 8 |

| 2. <b>Geographic Atrophy</b> | None | Quest | < I 2 | < O 2 | <half DA | < 1 DA | < 2 DA | ≥ 2DA | CG |
|------------------------------|------|-------|-------|-------|----------|--------|--------|-------|----|
| Area Centre Point            | 0    | 1     | 2     |       |          |        |        |       | 8  |
| Area Centre Subfield         | 0    | 1     | 2     | 3     | 4        | 5      |        |       | 8  |
| Area Centre + Inners         | 0    | 1     | 2     | 3     | 4        | 5      | 6      | 7     | 8  |
| Area within Grid             | 0    | 1     | 2     | 3     | 4        | 5      | 6      | 7     | 8  |

3. **End-Stage Maculopathy Type** None 0 Quest 1 Yes 2  
 disciform/detach ("wet") 1 GS ("dry") 2

| 4. <b>RPE Depigmentation</b> | None | Quest | < I 2 | < O 2 | <half DA | < 1 DA | < 2 DA | ≥ 2DA | CG |
|------------------------------|------|-------|-------|-------|----------|--------|--------|-------|----|
| Area Centre Subfield         | 0    | 1     | 2     | 3     | 4        | 5      |        |       | 8  |
| Area Centre + Inners         | 0    | 1     | 2     | 3     | 4        | 5      | 6      | 7     | 8  |
| Area within Grid             | 0    | 1     | 2     | 3     | 4        | 5      | 6      | 7     | 8  |

  

| 5. <b>Increased Pigment</b> | None | Quest | < C 0 | < C 1 | < C 2 | < O 2 | ≥ O 2 | Other C | CG |
|-----------------------------|------|-------|-------|-------|-------|-------|-------|---------|----|
| Area Centre Subfield        | 0    | 1     | 2     | 3     | 4     | 5     |       |         | 8  |
| Area Centre + Inners        | 0    | 1     | 2     | 3     | 4     | 5     | 6     | 7       | 8  |
| Area within Grid            | 0    | 1     | 2     | 3     | 4     | 5     | 6     | 7       | 8  |

**Drusen Grading**

6. **Confounding Ocular Lesions** None Quest Yes CG  
 Prevent Grading Drusen 0 1 2 8

7. **Drusen Within Grid** None Quest or Def CG  
 0 2 8

| 8. <b>Max Drusen Size</b> | None | Quest | < C-0 (63) | < C-1 (125) | < C-2 (250) | ≥ C-2 | Can't Grade |
|---------------------------|------|-------|------------|-------------|-------------|-------|-------------|
|                           | 0    | 1     | 2          | 3           | 4           | 5     | 8           |

  

| 9. <b>Drusen Number</b> | None | Quest/stippling | < 10 | ≥ 10 | Can't Grade |
|-------------------------|------|-----------------|------|------|-------------|
|                         | 0    | 1               | 2    | 3    | 8           |

  

| 10. <b>Soft Drusen</b> | None | Soft Distinct | Soft Indistinct | Can't Grade | Intermediate soft drusen (>C0, ≤C1) |
|------------------------|------|---------------|-----------------|-------------|-------------------------------------|
|                        | 0    | 1             | 2               | 8           | 3                                   |

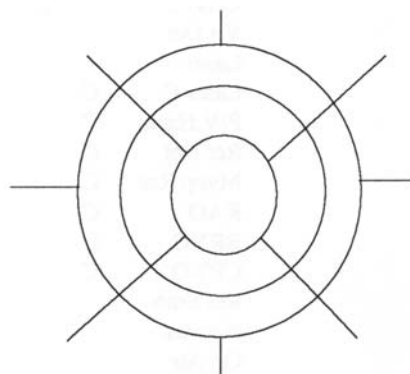

| 11. <b>Drusen Area</b> | None/Q/< C 0 | < C-1 | < C-2 | < I-2 | < O-2 | <half DA | < 1 DA | ≥ 1 DA | CG |
|------------------------|--------------|-------|-------|-------|-------|----------|--------|--------|----|
| C/Sub Only             | 0            | 1     | 2     | 3     | 4     | 5        | 6      | 7      | 8  |
| Centre + Inners        | 0            | 1     | 2     | 3     | 4     | 5        | 6      | 7      | 8  |
| Within Grid            | 0            | 1     | 2     | 3     | 4     | 5        | 6      | 7      | 8  |

Out Grid + F1 + F3 None 0 < O-2 1 ≥ O 2 2 CG 8

| 12. <b>Reticular Drusen</b> | None | Quest | Outside Grid | Within and Outside Grid | CG |
|-----------------------------|------|-------|--------------|-------------------------|----|
|                             | 0    | 1     | 2            | 3                       | 8  |

| 13. <b>Calcified Drusen</b> | None | Quest | Outside Grid | Within and Outside Grid | CG |
|-----------------------------|------|-------|--------------|-------------------------|----|
|                             | 0    | 1     | 2            | 3                       | 8  |

14. **Comments**

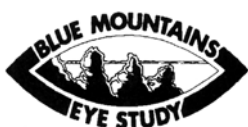

## 15. Other Ocular Lesions

| Quest/Def Present | None | Yes   | CG  | Lesion # | Description/Abbreviation |
|-------------------|------|-------|-----|----------|--------------------------|
|                   | 0    | 2     | 8   |          |                          |
|                   | No   | Quest | Yes | CG       |                          |
| Lesion 1          | 0    | 1     | 2   | 8        | -----                    |
| Lesion 2          | 0    | 1     | 2   | 8        | -----                    |
| Lesion 3          | 0    | 1     | 2   | 8        | -----                    |
| Lesion 4          | 0    | 1     | 2   | 8        | -----                    |
| Lesion 5          | 0    | 1     | 2   | 8        | -----                    |
| Lesion 6          | 0    | 1     | 2   | 8        | -----                    |
| Lesion 7          | 0    | 1     | 2   | 8        | -----                    |
| Lesion 8          | 0    | 1     | 2   | 8        | -----                    |

### Abbreviations for Common Lesions

|          |    |                                                                                                                                         |
|----------|----|-----------------------------------------------------------------------------------------------------------------------------------------|
| Retinop  |    | Possible diabetic retinopathy, (add:Haem, MA, or H/MA)                                                                                  |
| Def Ret  | C  | Definite diabetic retinopathy                                                                                                           |
| Chor Scr |    | Chorioretinal scar > 1500 microns from centre (various causes)                                                                          |
| Mac Scr  | C  | Chorioretinal scar < 1500 microns from centre (various causes)                                                                          |
| ToxoP    | C? | Old chorioretinal scar typical of Toxoplasmosis                                                                                         |
| Mac Oed  | C  | Macular oedema                                                                                                                          |
| Mac Hole | C  | Macular hole/cyst                                                                                                                       |
| Mac Oth  | C  | Macular other lesion, < 1500 microns from centre                                                                                        |
| SWR      | C? | Surface wrinkling retinopathy (preretinal fibrosis), with folds, tension lines or a patch (confounding if $\geq 1$ disc area in extent) |
| Cello R  |    | Cellophane reflex only                                                                                                                  |
| Vit Det  |    | Prominent posterior vitreous detachment                                                                                                 |
| Laser    |    | Photocoagulation scars, other (i.e. non-AMD)                                                                                            |
| Laser C  | C  | confounding if < 1500 microns from centre                                                                                               |
| P/V Haem | C  | Preretinal or vitreous haemorrhage                                                                                                      |
| Ret Det  | C  | Retinal detachment                                                                                                                      |
| Myop Ret | C  | Myopic crescent, > half longest disc diameter                                                                                           |
| RAO      | C  | Retinal artery occlusion, central or branch                                                                                             |
| BRVO     | C  | Branch retinal vein occlusion                                                                                                           |
| CRVO     | C  | Central retinal vein occlusion                                                                                                          |
| Ret Emb  |    | Retinal artery embolus (Hollenhorst plaque)                                                                                             |
| Naevus   |    | Choroidal Naevus                                                                                                                        |
| Op Atr   |    | Optic atrophy                                                                                                                           |
| Op Oed   |    | Optic disc oedema                                                                                                                       |
| Op Dru   |    | Optic disc drusen                                                                                                                       |
| Gl Rem   |    | Glia remnant, optic disc                                                                                                                |
| PP Atr   |    | Peripapillary Atrophy                                                                                                                   |
| Ang Stk  | C? | Angioid streaks                                                                                                                         |
| Ast Hyl  |    | Asteroid Hyalosis                                                                                                                       |
| Lg Cup   |    | Large opticcup, cup-disc ratio<br>(add characteristics: undercutting, notching, rim eroded)                                             |
| Cat      | C  | Cataracts preclude grading                                                                                                              |
|          | C  | <i>Lesion confounding grading of drusen or other AMD lesions</i>                                                                        |

Comments, Other Lesions

---



---

## **G. Blue Mountains Eye Study 3-Step Age-Related Macular Degeneration (AMD)**

### **Severity Scale**

No AMD was defined as the absence at the macula of large (>125 µm in diameter), indistinct soft or reticular drusen or combined large, distinct soft drusen and retinal pigmentary abnormalities or signs of late AMD.

Early AMD was defined as the presence at the macula of large (>125 µm in diameter), indistinct soft or reticular drusen or combined large, distinct soft drusen and retinal pigmentary abnormalities with the absence of signs of late AMD.

Late AMD was defined to include neovascular AMD and geographic atrophy.



H. Los Angeles Latino Eye Study preliminary grading form  
**LALES2 Preliminary Grading Form**

Rev #1 08/01/04

ID \_\_\_\_\_ Name Code \_\_\_\_\_

Grader \_\_\_\_\_ Date Graded \_\_\_\_/\_\_\_\_/\_\_\_\_

| OD PHOTO QUALITY             |   | Reasons    | Good          | Fair | B/P Ex          | B/P Unex | CG |
|------------------------------|---|------------|---------------|------|-----------------|----------|----|
| Good                         | 0 | To Reasons | 0             | 1    | 2               | 3        | 8  |
| Fair                         | 1 |            | 0             | 1    | 2               | --       | 8  |
| Borderline                   | 2 |            | 0             | 1    | 2               | 3        | 8  |
| Poor-Ungrad                  | 3 |            | 0             | 1    | 2               | 3        | 8  |
| NA-No Pix                    | 9 |            |               |      |                 |          |    |
| <b>OD Retakes Requested?</b> |   |            | <b>No = 0</b> |      | <b>Yes = 20</b> |          |    |

| ARM EXCLUDE      |   |                  |   |                    |    |
|------------------|---|------------------|---|--------------------|----|
| No               | 0 | Myopic Degen     | 5 | non-ARM RPE Change | 10 |
| Trauma           | 1 | Histo /Toxo      |   | non-ARM Detach     | 11 |
| Laser Rx         | 2 | Inflammatory     | 7 | Unknown Etiology   | 12 |
| Vessel Occlusion | 3 | Coloboma / Staph |   | Other              | 15 |
| Dystrophy        | 4 | RLF              | 9 |                    |    |

| Max Drusen Size      |   |
|----------------------|---|
| None                 | 0 |
| Quest/Stip           | 1 |
| < Std C <sub>0</sub> | 2 |
| < Std C <sub>1</sub> | 3 |
| < Std C <sub>2</sub> | 4 |
| Std C <sub>2</sub>   | 5 |
| Retic                | 6 |
| CG                   | 8 |

| OD ARM LESIONS         | No       | Q      | Yes     | CG   |
|------------------------|----------|--------|---------|------|
| Increased Pigment      | 0        | 1      | 2       | 8    |
| RPE Depigmentation     | 0        | 1      | 2       | 8    |
| Geographic Atrophy     | 0        | 1      | 2       | 8    |
| PED/RD Detachment      | 0        | 1      | 2       | 8    |
| Subret Hem             | 0        | 1      | 2       | 8    |
| Subret Scar            | 0        | 1      | 2       | 8    |
| ARM Rx                 | 0        | 1      | 2       | 8    |
| <b>ARM Progression</b> | 0 Better | 1 Same | 2 Worse | 8 CG |

| Drusen Area               |   |
|---------------------------|---|
| None - Q                  | 0 |
| <125 μ                    | 1 |
| <350 μ (I <sub>2</sub> )  | 2 |
| <650 μ (O <sub>2</sub> )  | 3 |
| ≥ 650 μ (O <sub>2</sub> ) | 4 |
| CG                        | 8 |

| OD DIABETIC RET LEVEL |    |   |   |      |    |
|-----------------------|----|---|---|------|----|
|                       | No | Q | Y | CSME | CG |
| Macular Edema         | 0  | 1 | 2 | 3    | 8  |

| Max Drusen Type |   |
|-----------------|---|
| None            | 0 |
| HI              | 1 |
| HD              | 2 |
| SD              | 3 |
| SI/Retic        | 4 |
| CG              | 8 |

| OD OTHER LESIONS   |    | NO = 0 | Yes = 2 | CG = 8 |
|--------------------|----|--------|---------|--------|
|                    | No | Q      | Y       | CG     |
| Recent BVO/CVO     | 0  | 1      | 2       | 8      |
| Hollenhorst Plaque | 0  | 1      | 2       | 8      |
| Mac Hole           | 0  | 1      | 2       | 8      |
| Large C/D          | 0  | 1      | 2       | 8      |
| Other              | 0  | 1      | 2       | 8      |

**OD COMMENTS**

# LALES2 Preliminary Grading Form

Rev #1 08/01/04

| OS PHOTO QUALITY |   | To Reasons | Reasons                      | Good | Fair          | B/P Ex | B/P Unex        | CG |
|------------------|---|------------|------------------------------|------|---------------|--------|-----------------|----|
| Good             | 0 | To Reasons | Focus                        | 0    | 1             | 2      | 3               | 8  |
| Fair             | 1 |            | Field                        | 0    | 1             | 2      | --              | 8  |
| Borderline       | 2 |            | Stereo                       | 0    | 1             | 2      | 3               | 8  |
| Poor-Ungrad      | 3 |            | Other                        | 0    | 1             | 2      | 3               | 8  |
| NA-No Pix        | 9 |            | <b>OS Retakes Requested?</b> |      | <b>No = 0</b> |        | <b>Yes = 20</b> |    |

| ARM EXCLUDE      |   | Reasons            | CG |
|------------------|---|--------------------|----|
| No               | 0 | Myopic Degen       | 5  |
| Trauma           | 1 | non-ARM RPE Change | 10 |
| Laser Rx         | 2 | non-ARM Detach     | 11 |
| Vessel Occlusion | 3 | Inflammatory       | 7  |
| Dystrophy        | 4 | Unknown Etiology   | 12 |
|                  |   | Coloboma / Staph   | 15 |
|                  |   | Other              | 9  |
|                  |   | RLF                | 9  |

| Max Drusen Size      |   | No | Q | Yes | CG |
|----------------------|---|----|---|-----|----|
| None                 | 0 | 0  | 1 | 2   | 8  |
| Quest/Stip           | 1 | 0  | 1 | 2   | 8  |
| < Std C <sub>0</sub> | 2 | 0  | 1 | 2   | 8  |
| < Std C <sub>1</sub> | 3 | 0  | 1 | 2   | 8  |
| < Std C <sub>2</sub> | 4 | 0  | 1 | 2   | 8  |
| Std C <sub>2</sub>   | 5 | 0  | 1 | 2   | 8  |
| Retic                | 6 | 0  | 1 | 2   | 8  |
| CG                   | 8 | 0  | 1 | 2   | 8  |

**OS ARM LESIONS**

| OS ARM LESIONS     | No | Q | Yes | CG |
|--------------------|----|---|-----|----|
| Increased Pigment  | 0  | 1 | 2   | 8  |
| RPE Depigmentation | 0  | 1 | 2   | 8  |
| Geographic Atrophy | 0  | 1 | 2   | 8  |
| PED/RD Detachment  | 0  | 1 | 2   | 8  |
| Subret Hem         | 0  | 1 | 2   | 8  |
| Subret Scar        | 0  | 1 | 2   | 8  |
| ARM Rx             | 0  | 1 | 2   | 8  |

**ARM Progression**      0 Better    1 Same    2 Worse    8 CG

| Drusen Area               |   | No | Q | Y | CSME | CG |
|---------------------------|---|----|---|---|------|----|
| None - Q                  | 0 | 0  | 1 | 2 | 3    | 8  |
| <125 μ                    | 1 | 0  | 1 | 2 | 3    | 8  |
| <350 μ (I <sub>2</sub> )  | 2 | 0  | 1 | 2 | 3    | 8  |
| <650 μ (O <sub>2</sub> )  | 3 | 0  | 1 | 2 | 3    | 8  |
| ≥ 650 μ (O <sub>2</sub> ) | 4 | 0  | 1 | 2 | 3    | 8  |
| CG                        | 8 | 0  | 1 | 2 | 3    | 8  |

**OS DIABETIC RET LEVEL**

| OS DIABETIC RET LEVEL | No | Q | Y | CSME | CG |
|-----------------------|----|---|---|------|----|
| Macular Edema         | 0  | 1 | 2 | 3    | 8  |

| Max Drusen Type |   | NO = 0 | Yes = 2 | CG = 8 |
|-----------------|---|--------|---------|--------|
| None            | 0 | 0      | 1       | 2      |
| HI              | 1 | 0      | 1       | 2      |
| HD              | 2 | 0      | 1       | 2      |
| SD              | 3 | 0      | 1       | 2      |
| SI/Retic        | 4 | 0      | 1       | 2      |
| CG              | 8 | 0      | 1       | 2      |

**OS OTHER LESIONS**

| OS OTHER LESIONS   | No | Q | Y | CG |
|--------------------|----|---|---|----|
| Recent BVO/CVO     | 0  | 1 | 2 | 8  |
| Hollenhorst Plaque | 0  | 1 | 2 | 8  |
| Mac Hole           | 0  | 1 | 2 | 8  |
| Large C/D          | 0  | 1 | 2 | 8  |
| Other              | 0  | 1 | 2 | 8  |

| OS COMMENTS |  |
|-------------|--|
|             |  |

ID \_\_\_\_\_  
 Namecode \_\_\_\_\_  
 Photodate \_\_\_\_\_  
 Grader \_\_\_\_\_  
 Date Graded \_\_\_\_\_

| OD  | OD |    | GRAD |   |     |
|-----|----|----|------|---|-----|
|     | Ab | Pr | No   | Y | G/F |
| F1  | 0  | 2  | 0    | 1 | 2   |
| F2  | 0  | 2  | 0    | 1 | 2   |
| F3  | 0  | 2  | 0    | 1 | 2   |
| F4+ | 0  | 2  | 0    | 1 | 2   |

| OTHER LESIONS     |      | HMA      |   | NVE |    |    |
|-------------------|------|----------|---|-----|----|----|
| Any?              | 0 No | 2 Yes    | 0 | 0   | 0  |    |
|                   |      | All Flds |   |     |    |    |
|                   |      | N        | Q | Y   | PT | CG |
| Calcified Drusen  | 0    | 1        | 2 | -   | 8  |    |
| Peripheral Drusen | 0    | 1        | 2 | -   | 8  |    |
| Peripap Atrophy   | 0    | 1        | 2 | -   | 8  |    |
| Art Sheathing     | 0    | 1        | 2 | -   | 8  |    |
| Cen Art Occlus    | 0    | 1        | 2 | -   | 8  |    |
| Br Art Occlus     | 0    | 1        | 2 | -   | 8  |    |
| Cen Vein Occlus   | 0    | 1        | 2 | -   | 8  |    |
| Br Vein Occlus    | 0    | 1        | 2 | -   | 8  |    |
| Hollen Plaque     | 0    | 1        | 2 | -   | 8  |    |
| Ast Hyalosis      | 0    | 1        | 2 | -   | 8  |    |
| Nevus             | 0    | 1        | 2 | -   | 8  |    |
| Chorioret Scar    | 0    | 1        | 2 | 3   | 8  |    |
| SWR Tension       | 0    | 1        | 2 | 3   | 8  |    |
| SWR Cello Reflex  | 0    | 1        | 2 | -   | 8  |    |
| Mac Hole          | 0    | 1        | 2 | 3   | 8  |    |
| Histoplasmosis    | 0    | 1        | 2 | 3   | 8  |    |
| Ret Detach        | 0    | 1        | 2 | 3   | 8  |    |
| Large C/D         | 0    | 1        | 2 | -   | 8  |    |
| Thick Vit/Glial   | 0    | 1        | 2 | -   | 8  |    |
| Other (comments)  | 0    | 1        | 2 | 3   | 8  |    |

|                   |   |
|-------------------|---|
| None              | 0 |
| Quest             | 1 |
| Def MA's Only     | 2 |
| Def HMA           | 3 |
| Std 1 (4 flds)    | 4 |
| Std 2A            | 5 |
| Std 2A (2/3 flds) | 6 |
| Std 2A (4 flds)   | 7 |
| CG                | 8 |

|       |   |
|-------|---|
| None  | 0 |
| Quest | 1 |
| <½ DA | 2 |
| ½ DA  | 3 |
| CG    | 8 |

**OD ARM GRADING EXCLUDE: N Y**

| MAX DRU SIZE       |       |
|--------------------|-------|
| None               | 0     |
| Quest/HI           | 1     |
| <C <sub>0</sub>    | 2     |
| <C <sub>1</sub>    | 3     |
| <C <sub>2</sub>    | 4     |
| C <sub>2</sub>     | 5     |
| Retic              | 6     |
| CG                 | 8     |
| # Subfields (0-9): | _____ |

| DRU AREA                |    |
|-------------------------|----|
| None / NA               | 0  |
| <63 μ (C <sub>0</sub> ) | 10 |
| <105μ                   | 20 |
| <125μ (C <sub>1</sub> ) | 25 |
| <250μ (C <sub>2</sub> ) | 30 |
| <350 (I <sub>2</sub> )  | 35 |
| <500                    | 40 |
| < 650 (O <sub>2</sub> ) | 45 |
| <½ DA                   | 50 |
| <1 DA                   | 60 |
| 1 DA                    | 70 |
| CG                      | 8  |

| MAX DRU TYPE       |       |
|--------------------|-------|
| None               | 0     |
| HI                 | 1     |
| HD                 | 2     |
| SD                 | 3     |
| SI/Retic           | 4     |
| CG                 | 8     |
| # Subfields (0-9): | _____ |

| DRU GRID TYPE |   |
|---------------|---|
| Absent        | 0 |
| Quest         | 1 |
| Present       | 2 |
| Predom/#      | 3 |
| CG            | 8 |

  

|       |   |   |
|-------|---|---|
| C     | I | O |
| Stip  |   |   |
| HD    |   |   |
| SD    |   |   |
| SI    |   |   |
| Retic |   |   |

| INC PIGMENT     |   |
|-----------------|---|
| None            | 0 |
| Quest           | 1 |
| <C <sub>0</sub> | 2 |
| <C <sub>1</sub> | 3 |
| <C <sub>2</sub> | 4 |
| <O <sub>2</sub> | 5 |
| O <sub>2</sub>  | 6 |
| Pig/Other       | 7 |
| CG              | 8 |

| RPE DEPIGMENT      |       |
|--------------------|-------|
| None               | 0     |
| Quest              | 1     |
| <C <sub>1</sub>    | 20    |
| <C <sub>2</sub>    | 30    |
| < I <sub>2</sub>   | 35    |
| <O <sub>2</sub>    | 40    |
| <½ DA              | 50    |
| <1 DA              | 60    |
| 1 DA               | 70    |
| CG                 | 8     |
| # Subfields (0-9): | _____ |

**ANY 0 No 2 Yes 8 CG**

|                    | N | Q | Y | CC | CPT | CG |
|--------------------|---|---|---|----|-----|----|
| Geographic Atrophy | 0 | 1 | 2 | 3  | 4   | 8  |
| PED/RD             | 0 | 1 | 2 | 3  | 4   | 8  |
| SubRet Hem         | 0 | 1 | 2 | 3  | 4   | 8  |
| SubRet Scar        | 0 | 1 | 2 | 3  | 4   | 8  |
| ARM RX             | 0 | 1 | 2 | 3  | 4   | 8  |

|                  | N | Q | Y | CC | CPT | CG |
|------------------|---|---|---|----|-----|----|
| Inc Pig CC/CPT   | 0 | 1 | 2 | 3  | 8   |    |
| RPE Depig CC/CPT | 0 | 1 | 2 | 3  | 8   |    |

GA # DAs in Grid (0-16): \_\_\_\_\_ Ex # DAs in Grid (0-16): \_\_\_\_\_

| DIABETIC RETINOPATHY LEVEL |    |
|----------------------------|----|
| DR Absent                  | 10 |
| Non-Diabetic               | 12 |
| Questionable               | 13 |
| HE, SE, IRMA, W/O MAs      | 14 |
| Hem Only, No MAs           | 15 |
| Microaneurysms Only        | 20 |
| Mild NPDR                  | 31 |
| Mild/Moderate NPDR         | 37 |
| Moderate NPDR              | 43 |
| Moderately Severe          | 47 |
| Severe NPDR                | 53 |
| FP Only                    | 60 |
| No Ret w/RX                | 61 |
| MA's Only w/RX             | 62 |
| Early NPDR w/RX            | 63 |
| Mod/Severe NPDR w/RX       | 64 |
| Moderate PDR               | 65 |
| DRS HRC                    | 71 |
| Severe DRS HRC             | 75 |
| Advanced PDR               | 81 |
| End-Stage PDR              | 85 |
| Cannot Grade               | 90 |

| HE      |   |
|---------|---|
| None    | 0 |
| Quest   | 1 |
| Present | 2 |
| CG      | 8 |

| LOOPS   |   |
|---------|---|
| None    | 0 |
| Quest   | 1 |
| Present | 2 |
| CG      | 8 |

| SE       |   |
|----------|---|
| None     | 0 |
| Quest    | 1 |
| Definite | 2 |
| CG       | 8 |

| IRMA              |   |
|-------------------|---|
| None              | 0 |
| Quest             | 1 |
| Definite          | 2 |
| Definite (4 flds) | 3 |
| Std 8A            | 4 |
| CG                | 8 |

| VB                |   |
|-------------------|---|
| None              | 0 |
| Quest             | 1 |
| Definite          | 2 |
| Def (2/more flds) | 3 |
| CG                | 8 |

| NVD      |   |
|----------|---|
| None     | 0 |
| Quest    | 1 |
| <Std #19 | 2 |
| Std # 19 | 3 |
| Std 10A  | 2 |
| Std 10A  | 3 |
| CG       | 8 |

**COMMENT**

| IF NVE GRADED 1/2/3 THEN LOCATION |    |   |    |    |
|-----------------------------------|----|---|----|----|
|                                   | Ab | Q | Pr | CG |
| F1                                | 0  | 1 | 2  | 8  |
| F2                                | 0  | 1 | 2  | 8  |
| F3                                | 0  | 1 | 2  | 8  |
| F4                                | 0  | 1 | 2  | 8  |
| F5                                | 0  | 1 | 2  | 8  |
| F6                                | 0  | 1 | 2  | 8  |
| F7                                | 0  | 1 | 2  | 8  |

| FP       |   |
|----------|---|
| None     | 0 |
| Quest    | 1 |
| FPE Only | 2 |
| FPD Only | 3 |
| FPD+FPE  | 4 |
| CG       | 8 |

| PRH-VH |   |
|--------|---|
| None   | 0 |
| Quest  | 1 |
| < 1DA  | 2 |
| ≥ 1 DA | 3 |
| CG     | 8 |

| MAC-ED       |   |
|--------------|---|
| None         | 0 |
| Quest        | 1 |
| Pr, not CSME | 2 |
| Pr, CSME     | 3 |
| Non-Diab     | 7 |
| CG           | 8 |

| PC-SCAR          |   |
|------------------|---|
| None             | 0 |
| Quest/Incomplete | 1 |
| Local            | 2 |
| Scatter Only     | 3 |
| Scatter + Local  | 4 |
| CG               | 8 |

| CTR          |   |
|--------------|---|
| None         | 0 |
| Quest        | 1 |
| Pr, CSME     | 2 |
| CSME w/cysts | 3 |
| Non-Diab     | 7 |
| CG           | 8 |

| FOC-RX        |   |
|---------------|---|
| None          | 0 |
| Quest         | 1 |
| MAs Rx Only   | 2 |
| Grid Only     | 3 |
| MAs + Grid Rx | 4 |
| CG            | 8 |

| ART-NAR  |   |
|----------|---|
| None     | 0 |
| Quest    | 1 |
| <Std #19 | 2 |
| Std # 19 | 3 |
| CG       | 8 |

| A/V-NICK    |   |
|-------------|---|
| Absent      | 0 |
| Quest       | 1 |
| Present     | 2 |
| No A/V Xing | 7 |
| CG          | 8 |

## LALES (AREDS) Severity Scale

| Level | Drusen Area                             | Inc Pigment    | RPE Depigment                       | GA             | Any Exud PED, Srhem, Srscar, Rx |
|-------|-----------------------------------------|----------------|-------------------------------------|----------------|---------------------------------|
| 1     | <125 $\mu$ (0 - 25)                     | 0              | 0                                   | 0              | 0                               |
| 2.1   | $\geq$ 125 $\mu$ - < 250 $\mu$ (30)     | 0              | 0                                   | 0              | 0                               |
| 2.2   | <125 $\mu$ (0 - 25)                     | $\geq$ Q (1-6) | 0                                   | 0              | 0                               |
| 2.3   | <125 $\mu$ (0 - 25)                     | NA             | $\geq$ Q - <350 $\mu$ (1 - 35)      | 0              | 0                               |
| 3     | $\geq$ 250 $\mu$ - <350 $\mu$ (35)      | 0              | 0                                   | 0              | 0                               |
| 4.1   | $\geq$ 350 $\mu$ - <650 $\mu$ (40, 45)  | 0              | 0                                   | 0              | 0                               |
| 4.2   | $\geq$ 125 $\mu$ - <350 $\mu$ (30 - 35) | $\geq$ Q (1-6) | 0 - < 350 $\mu$ (0-35)              | 0              | 0                               |
| 4.3   | $\geq$ 125 $\mu$ - <350 $\mu$ (30 - 35) | NA             | $\geq$ Q - <350 $\mu$ (1 - 35)      | 0              | 0                               |
| 4.4   | <250 $\mu$ (0 - 30)                     | NA             | $\geq$ 350 $\mu$ - <1/2 DA (40, 50) | 0              | 0                               |
| 5.1   | $\geq$ 650 $\mu$ - <1/2 DA (50)         | 0              | 0                                   | 0              | 0                               |
| 5.2   | $\geq$ 350 $\mu$ - <650 $\mu$ (40, 45)  | $\geq$ Q (1-6) | 0 - < 350 $\mu$ (0 - 35)            | 0              | 0                               |
| 5.3   | $\geq$ 350 $\mu$ - <650 $\mu$ (40, 45)  | NA             | $\geq$ Q - <350 $\mu$ (1-35)        | 0              | 0                               |
| 5.4   | $\geq$ 250 $\mu$ - <350 $\mu$ (35)      | NA             | $\geq$ 350 $\mu$ - <1/2 DA (40, 50) | 0              | 0                               |
| 6.1   | $\geq$ 1/2 DA (60, 70)                  | 0              | 0                                   | 0              | 0                               |
| 6.2   | $\geq$ 650 $\mu$ - <1/2 DA (50)         | $\geq$ Q (1-6) | 0 - < 350 $\mu$ (0 - 35)            | 0              | 0                               |
| 6.3   | $\geq$ 650 $\mu$ - <1/2 DA (50)         | NA             | $\geq$ Q - <350 $\mu$ (1 - 35)      | 0              | 0                               |
| 6.4   | $\geq$ 350 $\mu$ - <650 $\mu$ (40, 45)  | NA             | $\geq$ 350 $\mu$ - <1/2 DA (40, 50) | 0              | 0                               |
| 7.1   | $\geq$ 1/2 DA (60, 70)                  | $\geq$ Q (1-6) | 0 - < 350 $\mu$ (0 - 35)            | 0              | 0                               |
| 7.2   | $\geq$ 1/2 DA (60, 70)                  | NA             | $\geq$ Q - <350 $\mu$ (1 - 35)      | 0              | 0                               |
| 7.3   | $\geq$ 650 $\mu$ - <1/2 DA (50)         | NA             | $\geq$ 350 $\mu$ - <1/2 DA (40, 50) | 0              | 0                               |
| 8.1   | $\geq$ 1/2 DA (60, 70)                  | NA             | $\geq$ 350 $\mu$ - <1/2 DA (40, 50) | 0              | 0                               |
| 8.2   | Any (10-70)                             | NA             | $\geq$ 1/2 DA (60, 70)              | 0              | 0                               |
| 9     | Any (10-70)                             | NA             | NA                                  | noncentral (2) | 0                               |
| 10    | NA                                      | NA             | NA                                  | central (3-4)  | 0                               |
| 11    | NA                                      | NA             | NA                                  | NA             | any (2-4)                       |

# K. Rotterdam Study AMD Grading Form

klaver 16-02-95

## Rotterdam Study Age-related Maculopathy (ARM) Grading Form

Date of photo grading: \_\_\_\_\_

ID grader: \_\_\_\_\_

ID participant: \_\_\_\_\_

Date of photography: \_\_\_\_\_

OD / OS

Photo:

| Presence |                  | Focus |               | Fields            | Findings |
|----------|------------------|-------|---------------|-------------------|----------|
| No       | 0.0 unknown      | CG    | 0.0 photo     | 0 none            | 0 no     |
|          | 0.1 no eye exam  |       | 0.1 cataract  | 1 central         | 1 Q      |
|          | 0.2 no mydriasis |       | 0.2 mydriasis | 2 central, middle | 2 yes    |
| Yes      | 1.1 1 slide      | Fair  | 1.0 photo     | 3 all             | 7 CG     |
|          | 1.2 2 slides     |       | 1.1 cataract  |                   | 8 NA     |
| NA       | 8.8              |       |               | 1.2 mydriasis     |          |
|          |                  | Good  | 2.2           |                   |          |

Drusen:

Drusen in grid:

| Number           | in grid | outside grid | Largest size       | Most frequent type | Confluence   |
|------------------|---------|--------------|--------------------|--------------------|--------------|
| < C <sub>0</sub> | 0       | 0            | 1 Q                | 1 Q                | 0            |
|                  | 1 < 10  | 1 < 10       | 2 < C <sub>0</sub> | 2 < C <sub>0</sub> | 1 Q or < 10% |
|                  | 2 < 20  | 2 < 20       | 3 < C <sub>1</sub> | 3 < C <sub>1</sub> | 2 < 50%      |
|                  | 3 ≥ 20  | 3 ≥ 20       | 4 < C <sub>2</sub> | 4 < C <sub>2</sub> | 3 ≥ 50%      |
| < C <sub>1</sub> | 0       | 0            | 5 ≥ C <sub>2</sub> | 5 ≥ C <sub>2</sub> | 7 CG         |
|                  | 1 < 10  | 1 < 10       | 6 reticular        | 6 reticular        | 8 NA         |
|                  | 2 < 20  | 2 < 20       | 7 CG               | 7 CG               |              |
|                  | 3 ≥ 20  | 3 ≥ 20       | 8 NA               | 8 NA               |              |
| ≥ C <sub>1</sub> | 0       | 0            |                    |                    |              |
|                  | 1 < 10  | 1 < 10       |                    |                    |              |
|                  | 2 < 20  | 2 < 20       |                    |                    |              |
|                  | 3 ≥ 20  | 3 ≥ 20       |                    |                    |              |

| Drusen type     | central | inner | outer | Drusen area | central     | inner           | outer       |
|-----------------|---------|-------|-------|-------------|-------------|-----------------|-------------|
| hard            | 0       | 0     | 0     | < 1%        | $0 < 2xC_0$ | $0 < C_1 + C_2$ | $0 < 4xC_2$ |
| soft < $C_1$    | 1       | 1     | 1     | < 10%       | 1           | 1               | 1           |
| soft distinct   | 2       | 2     | 2     | < 25%       | 2           | 2               | 2           |
| soft indistinct | 3       | 3     | 3     | < 50%       | 3           | 3               | 3           |
| reticular       | 4       | 4     | 4     | $\geq 50\%$ | 4           | 4               | 4           |
| CG              | 7       | 7     | 7     | CG          | 7           | 7               | 7           |
| NA              | 8       | 8     | 8     | NA          | 8           | 8               | 8           |

| Increased pigment   | RPE degeneration        |
|---------------------|-------------------------|
| 0 no                | 0 no                    |
| 1 Q or outside grid | 1 Q or outside grid     |
| $2 < C_1$           | $2 < C_2$               |
| $3 < C_2$           | $3 < 5x C_2$            |
| $4 \geq C_2$        | 4 < central circle      |
| 5 pigment, other    | $5 \geq$ central circle |
| 7 CG                | 7 CG                    |
| 8 NA                | 8 NA                    |

**AMD:**

**Geographic Atrophy**

- 0 no
- 1 yes

**Neovascular MD**

- 0 no
- 1 yes

| If GA, presence | central | inner | outer | If NMD, presence | central | inner | outer |
|-----------------|---------|-------|-------|------------------|---------|-------|-------|
| none            | 0       | 0     | 0     | none             | 0       | 0     | 0     |
| Q               | 1       | 1     | 1     | Q                | 1       | 1     | 1     |
| < 25%           | 2       | 2     | 2     | < 25%            | 2       | 2     | 2     |
| < 50%           | 3       | 3     | 3     | < 50%            | 3       | 3     | 3     |
| ≥ 50%           | 4       | 4     | 4     | ≥ 50%            | 4       | 4     | 4     |
| CG              | 7       | 7     | 7     | CG               | 7       | 7     | 7     |
| NA              | 8       | 8     | 8     | NA               | 8       | 8     | 8     |

| If NMD, features | serous detachment | subretinal hemorrhage | fibrous scar | hard exudates |
|------------------|-------------------|-----------------------|--------------|---------------|
| absent           | 0                 | 0                     | 0            | 0             |
| Q                | 1                 | 1                     | 1            | 1             |
| present          | 2                 | 2                     | 2            | 2             |
| CG               | 7                 | 7                     | 7            | 7             |
| NA               | 8                 | 8                     | 8            | 8             |

*Other Observations:*

| Dot/blot hemorrhages | Arteriovenous nicking |
|----------------------|-----------------------|
| -- exact number      | 0                     |
| 77 CG                | 1 Q                   |
| 88 NA                | 2 present             |
|                      | 7 CG                  |
|                      | 8 NA                  |

1. ----- ICD-9 classification  
 000.00 remark  
 777.77 CG  
 888.88 NA

3. ----- ICD-9 classification  
 000.00 remark  
 777.77 CG  
 888.88 NA

2. ----- ICD-9 classification  
 000.00 remark  
 777.77 CG  
 888.88 NA

4. ----- ICD-9 classification  
 000.00 remark  
 777.77 CG  
 888.88 NA

Remarks

## L. Rotterdam Study 4-Step Age-Related Macular Degeneration Severity Scale

| Stage | Definition                                                                                     |
|-------|------------------------------------------------------------------------------------------------|
| 0 a   | No signs of AMD at all                                                                         |
| 0 b   | Hard drusen (< 63 $\mu\text{m}$ ) only                                                         |
| 1 a   | Soft distinct drusen ( $\geq$ 63 $\mu\text{m}$ ) only                                          |
| 1 b   | Pigmentary abnormalities only, no soft drusen ( $\geq$ 63 $\mu\text{m}$ )                      |
| 2 a   | Sift indistinct drusen ( $\geq$ 125 $\mu\text{m}$ ) or reticular drusen only                   |
| 2 b   | Soft distinct drusen ( $\geq$ 63 $\mu\text{m}$ ) with pigmentary abnormalities                 |
| 3     | Soft indistinct ( $\geq$ 125 $\mu\text{m}$ ) or reticular drusen with pigmentary abnormalities |
| 4     | Atrophic, neovascular, or mixed AMD                                                            |

AMD, age-related macular degeneration.



## **M. Members of the Three Continent AMD Consortium and Their Affiliations**

*(alphabetical by last name)*

Sivakumaran Theru Arumugam, PhD  
Assistant Professor of Clinical Pediatrics  
Assistant Director of Molecular Genetics Laboratory  
Division of Human Genetics, Cincinnati Children's Hospital Medical Center, Cincinnati,  
Ohio, USA

John Attia, MD, PhD  
Professor  
1) Centre for Clinical Epidemiology and Biostatistics, School of Medicine and Public  
Health, University of Newcastle, Newcastle, New South Wales, Australia  
2) Department of Medicine, John Hunter Hospital and Hunter Medical Research  
Institute, Newcastle, New South Wales, Australia

Gabriëlle H. S. Buitendijk, MD, MSc  
PhD Candidate  
Departments of Ophthalmology & Epidemiology, Erasmus Medical Centre, Rotterdam,  
the Netherlands

Paulus T. V. M. de Jong, MD, PhD  
Professor  
1) Department of Ophthalmogenetics, Netherlands Institute of Neurosciences, Institute  
of the Royal Netherlands Academy of Arts & Sciences, Amsterdam, the Netherlands  
2) Department of Ophthalmology, Academic Medical Center, Amsterdam, the  
Netherlands  
3) Department of Ophthalmology, Leiden University Medical Center, Leiden, the  
Netherlands

Ronald E. Gangnon, PhD  
Assistant Professor  
Departments of Population Health Sciences & Biostatistics and Medical Informatics,  
University of Wisconsin-Madison, Madison, Wisconsin, USA

Xiaoyi (Raymond) Gao, PhD  
Assistant Professor of Research  
1) Keck School of Medicine, University of Southern California, Los Angeles, California,  
USA  
2) Department of Ophthalmology and Visual Science, University of Illinois, Chicago,  
Illinois, USA

Albert Hofman, MD, PhD  
Professor  
1) Department of Epidemiology, Erasmus Medical Centre, Rotterdam, the Netherlands  
2) Netherlands Consortium for Healthy Aging, Netherlands Genomics Initiative, the  
Hague, the Netherlands

Elizabeth G. Holliday, PhD  
Researcher  
Centre for Clinical Epidemiology and Biostatistics, and School of Medicine and Public Health, University of Newcastle, Newcastle, New South Wales, Australia

Sudha K. Iyengar, PhD  
Professor  
Department of Epidemiology and Biostatistics, Case Western Reserve University, Cleveland, Ohio, USA

Caroline C. W. Klaver, MD, PhD  
Professor  
Departments of Ophthalmology & Epidemiology, Erasmus Medical Centre, Rotterdam, the Netherlands

Ronald Klein, MD, MPH  
Professor  
Department of Ophthalmology & Visual Sciences, University of Wisconsin-Madison, Madison, Wisconsin, USA

Barbara E. K. Klein, MD, MPH  
Professor  
Department of Ophthalmology & Visual Sciences, University of Wisconsin-Madison, Madison, Wisconsin, USA

Kristine E. Lee, MS  
Senior Biostatistician  
Department of Ophthalmology & Visual Sciences, University of Wisconsin-Madison, Madison, Wisconsin, USA

Roberta McKean-Cowdin, PhD  
Assistant Professor of Research  
Keck School of Medicine, University of Southern California, Los Angeles, California, USA

Stacy M. Meuer, BS  
Senior Grader  
Department of Ophthalmology & Visual Sciences, University of Wisconsin-Madison, Madison, Wisconsin, USA

Paul Mitchell, MD, PhD  
Professor  
Clinical Ophthalmology & Eye Health, University of Sydney, Westmead, New South Wales, Australia

Chelsea E. Myers, MStat  
Biostatistician  
Department of Ophthalmology & Visual Sciences, University of Wisconsin-Madison,  
Madison, Wisconsin, USA

Elena Rochtchina, MAppStat  
Senior Statistician  
Centre for Vision Research, Westmead Hospital, University of Sydney, Westmead, New  
South Wales, Australia

Ava G. Tan, BSc (Hons), MAIT  
Photographic Grader/Data & Computer Manager  
Centre for Vision Research, University of Sydney, Westmead Hospital, Westmead, New  
South Wales, Australia

Andrè G. Uitterlinden, PhD  
Professor  
1) Department of Epidemiology, Erasmus Medical Centre, Rotterdam, the Netherlands  
2) Department of Internal Medicine, Erasmus Medical Centre, Rotterdam, the  
Netherlands  
3) Netherlands Consortium for Healthy Aging, Netherlands Genomics Initiative, the  
Hague, the Netherlands

Cornelia M. van Duijn, PhD  
Professor  
Department of Epidemiology, Erasmus Medical Centre, Rotterdam, the Netherlands

Rohit Varma, MD, MPH  
Professor  
1) Doheny Eye Institute, University of Southern California, Los Angeles, California, USA  
2) Department of Ophthalmology and Visual Science, University of Illinois, Chicago,  
Illinois, USA

Johannes R. Vingerling, MD, PhD  
Professor  
Departments of Ophthalmology & Epidemiology, Erasmus Medical Centre, Rotterdam,  
the Netherlands

Jie Jin Wang, PhD  
Associate Professor  
Centre for Vision Research, Department of Ophthalmology, Westmead Hospital,  
University of Sydney, Westmead, New South Wales, Australia
